# Clues to Neuro-Degeneration in Niemann-Pick Type C Disease from Global Gene Expression Profiling

Jonathan V. Reddy, Ian G. Ganley, Suzanne R. Pfeffer\*

Department of Biochemistry, Stanford University School of Medicine, Stanford, California, United States of America

**Background.** Niemann-Pick Type C (NPC) disease is a neurodegenerative disease that is characterized by the accumulation of cholesterol and glycosphingolipids in the late endocytic pathway. The majority of NPC cases are due to mutations in the NPC1 gene. The precise function of this gene is not yet known. **Methodology/Principal Findings.** Using cDNA microarrays, we analyzed the genome-wide expression patterns of human fibroblasts homozygous for the I1061T NPC1 mutation that is characterized by a severe defect in the intracellular processing of low density lipoprotein-derived cholesterol. A distinct gene expression profile was identified in NPC fibroblasts from different individuals when compared with fibroblasts isolated from normal subjects. As expected, NPC1 mutant cells displayed an inappropriate homeostatic response to accumulated intracellular cholesterol. In addition, a number of striking parallels were observed between NPC disease and Alzheimer's disease. **Conclusions/Significance.** Many genes involved in the trafficking and processing of amyloid precursor protein and the microtubule binding protein, tau, were more highly expressed. Numerous genes important for membrane traffic and the cellular regulation of calcium, metals and other ions were upregulated. Finally, NPC fibroblasts exhibited a gene expression profile indicative of oxidative stress. These changes are likely contributors to the pathophysiology of Niemann-Pick Type C disease.

Citation: Reddy JV, Ganley IG, Pfeffer SR (2006) Clues to Neuro-Degeneration in Niemann-Pick Type C Disease from Global Gene Expression Profiling. PLoS ONE 1(1): e19. doi:10.1371/journal.pone.0000019

## INTRODUCTION

Niemann Pick Type C disease (NPC) is a fatal, autosomal recessive neurodegenerative disease due to mutations in the NPC1 or NPC2 genes [1,2]. NPC is associated with an inability to process cellular cholesterol, which accumulates together with glycosphingolipids within lysosomes of affected individuals. The disease is often diagnosed in early childhood, with patients typically displaying cerebellar ataxia, difficulty speaking and swallowing, and progressive dementia. Mutations in the NPC1 gene account for approximately 95% of NPC cases.

NPC1 is a 1278 amino acid protein with 13 transmembrane domains that is important for normal cholesterol homeostasis [3]. NPC1 transmembrane domains 3–7 comprise a so-called sterol sensing domain that is related to hydroxymethylglutaryl CoA reductase [4], sterol regulatory element-binding protein cleavage activating protein (SCAP; [5], PATCHED [6,7]) and NPC1-like protein, NPC1L1 [8]. The NPC1 protein was recently shown to bind cholesterol [9]. Mutations in the NPC1 sterol sensing domain can cause disease, as can mutations throughout the protein, the bulk of which resides within the membrane bilayer or within the lumen of late endosomes [1].

To begin to understand how loss of NPC1 function leads to neurodegeneration, we have examined the global pattern of gene expression in primary fibroblast cells from NPC patients. To avoid possible phenotypic variation between different mutant alleles, we designed our analysis using cells from different individuals who each carried the identical, homozygous mutations within their NPC1 loci. The most common NPC-1 mutation described is I1061T, which accounts for 20% of the alleles in the United Kingdom and France and about 15% in the United States [10,11] and leads to a severe disruption of cholesterol processing. Homozygous carriers of the I1061T mutation present with a relatively mild neurological form of the disease with onset in juvenile years; importantly, their clinical presentation is homogeneous. In our experimental design, we hoped that gene expression differences between any two individuals would be averaged out, highlighting changes due to this specific mutation at both NPC1

alleles. As shown here, NPC1 fibroblasts showed highly significant differences when compared with normal fibroblast controls. The specific gene expression changes observed provide important clues to the pathophysiology of NPC disease.

## RESULTS AND DISCUSSION

Primary skin fibroblasts isolated from four patients homozygous for the I1061T mutation and four control individuals were cultured under identical conditions. RNA was isolated from all samples and hybridized to cDNA microarrays consisting of approximately 43,000 elements representing approximately 36,000 genes. Analysis of the data using a supervised hierarchical clustering method identified a gene expression pattern that was unique and consistent among NPC fibroblasts (Figure 1A). To identify statistically significant gene expression profile changes that are likely to result from the I1061T mutation in the NPC1 gene we used SAM (Significance Analysis of Microarrays; [12]).

SAM identifies genes with statistically significant changes in expression by assimilating a set of gene-specific *t* tests. Each gene is assigned a score on the basis of its change in gene expression relative to the standard deviation of repeated measurements for

.....  
**Academic Editor:** Winston Hide, University of the Western Cape, South Africa

**Received** August 23, 2006; **Accepted** September 14, 2006; **Published** December 20, 2006

**DOI:** 10.1371/journal.pone.0000019

**Copyright:** © 2006 Reddy et al. This is an open-access article distributed under the terms of the Creative Commons Attribution License, which permits unrestricted use, distribution, and reproduction in any medium, provided the original author and source are credited.

**Funding:** Ara Parseghian Medical Research Foundation and the NIH (DK37332).

**Competing Interests:** The authors have declared that no competing interests exist.

\* **To whom correspondence should be addressed.** E-mail: pfeffer@stanford.edu

that gene. Genes with scores greater than a threshold are deemed potentially significant. The percentage of such genes identified by chance is defined as the false discovery rate. Figure 1B shows the distribution of the ~43,000 elements analyzed in this study. Many more genes were found to be significantly up-regulated (3578, red points) than down-regulated (699, green points) when comparing normal and NPC1 cells (Fig. 1B). SAM identified approximately 3600 significant genes in our data set with an estimated false discovery rate of 5%; ~1300 genes showed  $\geq 1.5$  fold up-regulation compared with normal cells. The large number of upregulated genes suggests that NPC cells are compensating to survive under challenging circumstances. An Excel list of all significant genes showing a  $< 2\%$  false discovery rate is included for the reader as a supplemental file (Dataset S1).

It is important to note that the absolute fold change in the level of a specific transcript need not be high to be highly significant, and to have significant consequences for cell physiology [12]. For many of the genes shown, the potential false discovery rate was less than 1%, and as described below, several of the changes have been verified at the protein level.

Initial analysis of the upregulated genes confirmed the validity of our experimental protocol, as genes expected to be upregulated in cells lacking NPC1 function were upregulated: for example, the

gene encoding NPC2 protein was upregulated 1.7 fold and the gene encoding NPC1-like protein, NPC1L1 was upregulated 1.3 fold (Table 1). This confirms previous work demonstrating the upregulation of NPC2 at the protein level in NPC1 fibroblasts [13,14].

### Cholesterol Homeostasis

In normal cells, cholesterol levels are tightly regulated by a number of mechanisms that include cholesterol uptake, storage and efflux [15]. At the transcriptional level, sterol regulatory element-binding proteins regulate the expression of a large number of genes involved in the synthesis and uptake of cholesterol, fatty acids, triglycerides and phospholipids, as well as NADPH that is needed for lipid and cholesterol synthesis [16]. In the presence of adequate cholesterol in the endoplasmic reticulum (ER), these transcription factors fail to translocate to the nucleus, and genes involved in cholesterol synthesis and uptake are no longer activated.

NPC cells are well documented in terms of their inability to respond to the accumulation of unesterified cholesterol within late endocytic compartments. In these cells, LDL receptor expression is not down-regulated and consequently, LDL uptake continues to occur despite the increased cellular content of free cholesterol [17]. Microarray analysis confirmed this dysregulation: elevated expression (1.5 fold) of the LDL receptor gene was readily detected in NPC fibroblasts homozygous for the I1061T mutation when compared with normal fibroblasts (Table 1).

Cellular cholesterol is also regulated by Liver X Receptors (LXRs), which are activated by cholesterol-derived oxysterols. LXRs activate target genes that participate in the efflux of cellular cholesterol, including the transporters, ABCA1 and ABCG5/ABCG8. NPC cells are defective in oxysterol generation and subsequent LXR activation [18]. Previous, direct measurements of ABCA1 mRNA indicated significantly less upregulation of ABCA1 gene expression in NPC1<sup>-/-</sup> cells upon cholesterol addition than observed in wild type cells [19]. ABCA1 and ABCG5 expression levels were altered in NPC cells in accordance with earlier reports (Table 1). In addition, we observed increased expression of ABCA7, a non-LXR regulated transporter that has the ability to support apolipoprotein-mediated release of cellular cholesterol and phospholipid (Table 1, ref. [20]).

Increased expression of several proteins from the oxysterol binding protein family (OSBPL3, OSBPL6 and OSBPL8) was also detected (Table 1). One function ascribed to this protein family is non-vesicular cholesterol transfer between the ER and the plasma membrane [21]. Both OSBPL3 and OSBPL6 contain targeting sequences for the ER and plasma membrane. Interestingly, overexpression of the related OSBP2 protein leads to the activation of cholesterol synthesis and LDL receptor upregulation, perhaps by enhancing ER cholesterol efflux [21].

### Links to Neurodegenerative Disease

As in Alzheimer's disease, defects in the processing of the amyloid precursor protein (APP) are well documented for NPC cells [22–25]. APP can be processed via two different pathways. In the non-amyloidogenic pathway, APP is cleaved by alpha-secretase to generate a C-terminal fragment (CTF) followed by cleavage with the gamma-secretase complex, resulting in the generation of two non-amyloidogenic peptides. In the amyloidogenic pathway, APP is cleaved by beta-secretase prior to cleavage with gamma-secretase, generating the Abeta fragments that are associated with amyloid plaque formation. Burns et al. [23] have shown that mouse NPC cells show enhanced gamma secretase activity, leading to increased Abeta, Abeta42 and beta-CTF production.

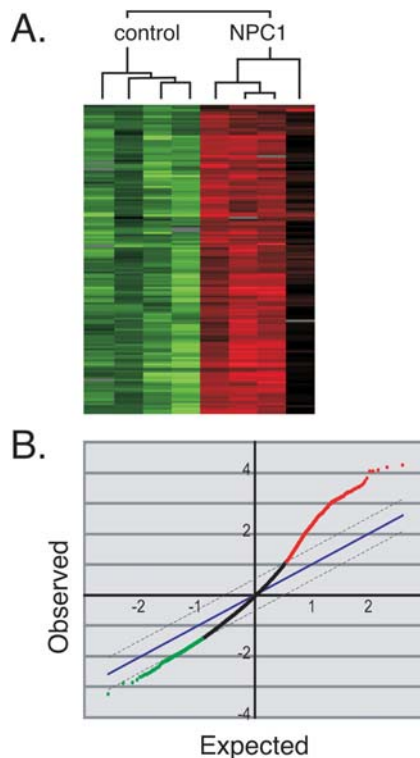

**Figure 1.** Gene expression is significantly altered in NPC1 fibroblasts. (A) Supervised hierarchical clustering of the top 200 genes after SAM analysis. The dendrogram at the top shows clustering of NPC and control fibroblasts into distinct groups. Genes with higher expression are shown in red; genes with lower expression are shown in green. Gray bars indicate missing data. Cell lines clustered in the following order (left to right): control lines AG10803, GM05659, GM09503, GM03726; NPC-1 lines GM017909, 59413, 83.16, and GM18453. (B) Significance Analysis of Microarrays [12] was used to identify genes that varied in expression between NPC fibroblasts and control fibroblasts from healthy patients. The plot of the data from 43,000 elements reveals approximately 3600 significant genes that have increased expression in NPC fibroblasts (shown in red). doi:10.1371/journal.pone.0000019.g001

**Table 1.** Genes involved in Cholesterol Homeostasis are upregulated in NPC cells.

| Accession number | Symbol | Name                                                              | Fold Change | False Discovery Rate |
|------------------|--------|-------------------------------------------------------------------|-------------|----------------------|
| AI206275         | ABCA1  | ATP-binding cassette, sub-family A (ABC1), member 1               | 1.4         | 0.5                  |
| AI668630         | ABCA7  | ATP-binding cassette, sub-family A (ABC1), member 7               | 1.4         | 0.9                  |
| T97780           | ABCG5  | ATP-binding cassette, sub-family G (WHITE), member 5 (sterolin 1) | 1.4         | 2.8                  |
| AA255954         | ACBD3  | Acyl-Coenzyme A binding domain containing 3                       | 1.4         | 1.9                  |
| AA702706         | CYP3A5 | Cytochrome P450, family 3, subfamily A, polypeptide 43            | 1.4         | 1.2                  |
| AA992540         | CYP7B1 | Cytochrome P450, family 7, subfamily B, polypeptide 1             | 1.7         | 0.1                  |
| AA928708         | CYP8B1 | Cytochrome P450, family 8, subfamily B, polypeptide 1             | 1.8         | 0                    |
| AA669312         | LDLR   | Low density lipoprotein receptor                                  | 1.4         | 1.9                  |
| AA976046         | LPL    | Lipoprotein lipase                                                | 1.8         | 0.1                  |
| AA676945         | NPC1L1 | NPC1 (Niemann-Pick disease, type C1, gene)-like 1                 | 1.3         | 3.6                  |
| AA630449         | NPC2   | Niemann-Pick disease, type C2                                     | 1.7         | 0.4                  |
| AI342012         | MSR1   | Macrophage scavenger receptor 1                                   | 1.6         | 0.2                  |
| H10059           | OSBPL3 | Oxysterol binding protein-like 3                                  | 1.4         | 1.2                  |
| AI094626         | OSBPL6 | Oxysterol binding protein-like 6                                  | 1.5         | 1.2                  |
| AA126551         | OSBPL8 | Oxysterol binding protein-like 8                                  | 1.5         | 0.4                  |

DOI: 10.1371/journal.pone.0000019.t001

They also noted an alteration in the localization of presenilin 1 to some Rab5-positive, putative early endosomes in NPC cells [23]. Increased levels of Abeta, Abeta 42 and beta-CTF were also reported by others [22,24,25].

Consistent with previous analyses of mouse NPC cells [23], we found little difference in the mRNA and protein levels of full length amyloid precursor protein, beta secretases (BACE), or the level of the gamma secretase component, presenilin, in human NPC1 cells compared with normal fibroblasts (Figure 2). At the protein level, Nicastrin polypeptide was increased, which could contribute to increased gamma secretase activity. Importantly, we confirmed a significant increase in the generation of amyloid C-terminal fragments at the protein level, in human NPC-1 fibroblasts (Figure 2).

Additionally, expression of the amyloid beta precursor binding protein 2 (APBB2 or Fe65-like), was upregulated 2.6 fold with high significance (0.1% false discovery rate), and was among the highest upregulated genes in our entire data set (Table 2). This protein is thought to regulate the intracellular transport of the amyloid precursor protein. As shown in Figure 2, both the mRNA and APBB2 protein were upregulated ~2.5 fold in NPC1 cells as determined by immunoblotting of cell extracts. APBB2 interacts with the cytoplasmic domain of APP [26,27]. The association of APBB2 with APP is required for subsequent processing of APP CTF's by gamma secretases, and overexpression of APBB2 leads to the increased generation of the amyloidogenic Abeta42 fragment [27]. Upregulation of APBB2 in NPC fibroblasts may contribute to the increased generation of Abeta42 in NPC cells.

Recent work has indicated that Abeta42 may directly activate neutral sphingomyelinases [28]. This activation would potentially increase ceramide generation in NPC1 cells and may be linked to oxidative stress. A neutral sphingomyelinase activating protein mRNA (NSMAF) was upregulated in our dataset (Table 2).

Genes encoding LDL receptor-related proteins (LRP1, LRP2 and LRP6) were upregulated 1.8, 2.2 and 2.7 fold, respectively, in NPC fibroblasts (Table 2 and Supp. Table 3). LRP1 interacts with APP and may enhance its internalization, thereby favoring initial intracellular APP cleavage by beta-secretase [29]. APP undergoes axonal transport to nerve terminals in a complex with the signaling

protein, MAPK8IP1 in a kinesin-1 dependent manner [30,31]. A Kinesin-1 component (KLC2) and MAPK8IP1 were all upregulated in NPC cells, and could contribute to the transport of APP in NPC neurons (Table 2). In summary, genes encoding multiple factors that contribute to the generation of amyloid are expressed at higher levels in NPC1 cells.

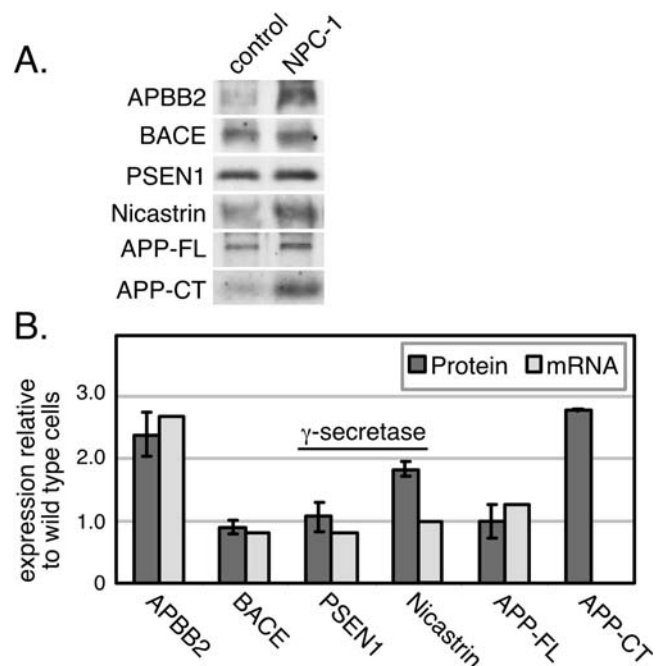

**Figure 2.** Links to Alzheimer's disease at the mRNA and protein levels in NPC Cells. Protein levels in control and NPC-1 fibroblasts, determined by immunoblot (panel A), are quantified in B (dark shaded bars); mRNA levels from microarray data are shown in light shaded bars for comparison.

doi:10.1371/journal.pone.0000019.g002

**Table 2.** Genes associated with Alzheimer's disease are upregulated in NPC cells.

| Accession number | Symbol   | Name                                                                        | Fold Change | False Discovery Rate |
|------------------|----------|-----------------------------------------------------------------------------|-------------|----------------------|
| AA553762         | APBB2    | Amyloid beta (A4) precursor protein-binding, family B, member 2 (Fe65-like) | 2.6         | 0                    |
| AA234298         | BDNF     | Brain-derived neurotrophic factor                                           | 1.7         | 0.2                  |
| W47179           | CTSB     | Cathepsin B                                                                 | 1.5         | 1.3                  |
| AA121031         | ERBB4    | V-erb-a erythroblastic leukemia viral oncogene homolog 4                    | 1.9         | 0                    |
| AA626316         | KLC2     | Likely ortholog of kinesin light chain 2                                    | 1.6         | 0                    |
| AA464566         | LRP1     | Low density lipoprotein-related protein 1 (alpha-2-macroglobulin receptor)  | 1.8         | 0.1                  |
| AI821048         | LRP2     | Low density lipoprotein-related protein 2                                   | 2.2         | 0.1                  |
| W47666           | MAPK8    | Mitogen-activated protein kinase 8                                          | 1.4         | 1.6                  |
| AI206407         | MAPK8IP1 | Mitogen-activated protein kinase 8 interacting protein 1                    | 1.5         | 0.4                  |
| AA046107         | NSMAF    | Neutral sphingomyelinase (N-5Mase) activation associated factor             | 1.5         | 0.2                  |
| N63949           | NTRK2    | Neurotrophic tyrosine kinase, receptor, type 2                              | 1.4         | 1.7                  |
| AI360356         | SYP      | Synaptophysin                                                               | 1.5         | 0.2                  |
| AA564047         | TGM4     | Transglutaminase 4 (prostate)                                               | 2.9         | 0                    |
| N80413           | TTBK1    | Tau tubulin kinase 1                                                        | 1.4         | 0.9                  |

DOI: 10.1371/journal.pone.0000019.t002

### Intracellular Calcium Regulation

The expression of a number of calcium-regulated and regulating proteins was increased in NPC fibroblasts (Table 3). These include voltage gated calcium channels such as CACNA1C, calcium dependent protein kinases (CAMK1 and CAMK4), phospholipase C, ryanodine receptor and also calpains (CAPN5). The upregulation of these proteins is consistent with altered cytosolic calcium levels in NPC1 mutant cells. Defects in calcium regulation have been reported for a number of neurodegenerative diseases (see [32,33] for review). Moreover, Abeta42 has been shown to disrupt intracellular calcium regulation which may play a role in Alzheimer's disease [34]. Abeta increases the activation of L type voltage gated calcium channels [35,36] and has even been proposed to itself form a cation channel [37].

**Tau protein** One of the major features of both Alzheimer's and NPC diseases is the accumulation of neurofibrillary tangles in the brain. A major component of such tangles is an abnormally phosphorylated form of the microtubule binding protein, tau [38]. Although the mechanism of tangle formation is unknown, phosphorylation of the tau protein C-terminus is thought to disrupt microtubule binding and trigger subsequent aggregation. NPC fibroblasts displayed enhanced expression of a number of kinases that may participate in tau phosphorylation (TTBK1, MAPK8, PRKCG) (Table 2, III; [39–41]). Divalent cations such as calcium have also been implicated in the formation of phosphorylated tau aggregates [42]. As discussed earlier, many alterations in gene expression suggest an alteration in calcium homeostasis in NPC cells (Table 3).

**Table 3.** Genes associated with calcium regulation are upregulated in NPC fibroblasts.

| Accession number | Symbol | Name                                                                      | Fold Change | False Discovery Rate |
|------------------|--------|---------------------------------------------------------------------------|-------------|----------------------|
| AW004620         | CAMK1  | Calcium/calmodulin-dependent protein kinase I                             | 1.8         | 0.1                  |
| AA903749         | CAMK1D | Calcium/calmodulin-dependent protein kinase ID                            | 1.6         | 0.1                  |
| AA455227         | CAMK4  | Calcium/calmodulin-dependent protein kinase IV                            | 1.4         | 1.6                  |
| AA521411         | CAMLG  | Calcium modulating ligand                                                 | 1.6         | 1.7                  |
| AA458480         | CAMTA2 | Calmodulin binding transcription activator 2                              | 1.6         | 0.2                  |
| AA587773         | CANT1  | Calcium activated nucleotidase 1                                          | 1.9         | 0.1                  |
| H81543           | CAPN5  | Calpain 5                                                                 | 2.2         | 0                    |
| AA412186         | CAST   | Calpastatin                                                               | 1.5         | 0.2                  |
| AA857871         | NFATC3 | Nuclear factor of activated T-cells, cytoplasmic, calcineurin-dependent 3 | 2           | 0                    |
| AI820551         | P2RY1  | Purinergic receptor P2Y, G-protein coupled, 1                             | 2.5         | 0                    |
| R89714           | PRKCG  | Protein kinase C, gamma                                                   | 1.6         | 0.2                  |
| AA815407         | RYR1   | Ryanodine receptor 1 (skeletal)                                           | 1.5         | 1.1                  |

DOI: 10.1371/journal.pone.0000019.t003

Transglutaminase catalyzes the formation of insoluble tau aggregates *in vitro*, and increased transglutaminase activity has been observed in Alzheimer's disease [43,44]. Transglutaminase 4 is significantly upregulated in NPC fibroblasts, and may contribute to tau aggregation in NPC disease [Table 2].

**Cellular toxicity induced in NPC disease** Oxidative stress is a major factor in a variety of neurodegenerative diseases [45]. NPC cells displayed a number of changes in gene expression that are associated with the generation of reactive oxygen and nitrogen species (Table 4). CHGA (chromogranin A), a component of Alzheimer's disease plaques [46], induces nitric oxide efflux from microglia, a key step in neurodegeneration [47]. Components of the phagocytic NADPH oxidase (CYBB, NCF4) that can generate reactive oxygen species were upregulated [48]. Correspondingly, a number of genes that respond to oxidative stress (MT1G, MT3, GPX3 and GSTM2) were also upregulated in NPC fibroblasts.

Components of the mitochondrial electron transport chain were also upregulated. This may indicate a compensatory response to a disruption in electron transport chain function as seen in other neurodegenerative diseases such as Parkinson's. Reduced electron transport chain activity has been associated with reactive oxygen species production [49].

Altered levels of the metal ions copper, zinc and iron have been observed in Alzheimer's disease. The disruption in steady state levels of iron and copper may play a role in oxidative damage [50,51]. NPC fibroblasts demonstrated enhanced expression of a wide range of transporters and solute carriers, suggesting that the cells are electro-physiologically challenged (Table S1). Genes involved in iron homeostasis and copper and zinc transport were also upregulated, suggestive of an alteration in the cellular homeostasis of these cations (Table S2).

## Pleiotropic Changes in Membrane Trafficking Factors

The increased cholesterol in NPC late endosomes and lysosomes interferes with transport of proteins between these compartments (cf. [52]). Consequently, proteins involved in membrane trafficking and in particular, lysosome biogenesis, may be upregulated to compensate for this defect. The lysosomal hydrolase, cathepsin B,

was upregulated in NPC cells. Both cathepsin B and cathepsin D can function as beta-secretase enzymes, and are partially mislocalized to early endosomes in Alzheimer's disease [53,54]. We have shown elsewhere that in NPC cells, the cation-independent mannose 6-phosphate receptor (CI-MPR) is upregulated 1.6 fold at the protein level, along with two proteins involved in its recycling to the Golgi complex: Rab9 GTPase and the Rab9 effector, p40 [52]. p40 mRNA showed a 1.3 fold upregulation in our dataset (Table S3); CI-MPR and Rab9 were not present among the final array data elements. The cation-dependent (CD)-MPR was upregulated 1.5 fold in our microarray analyses (Table S3). This may be in part to compensate for this protein's rapid degradation in NPC fibroblasts [52].

In addition to the MPR trafficking components, many key factors required for membrane traffic were upregulated (Table S3). This includes as many as 8 Rab GTPases and numerous Rab interacting proteins and GTPase activating proteins (TBC-domain containing proteins), and several coat complexes involved in transport vesicle assembly. Rab proteins are general regulators of membrane traffic and have been of particular interest in NPC-disease, as overexpression of several Rabs appears to reverse the cholesterol accumulation phenotype in cell culture [reviewed in 52]. The BLOC1S1 protein complex that is key in the biogenesis of lysosome related organelles was upregulated 2.4 fold (Table S3), and an AP3-subunit key for synaptic vesicle recycling was also upregulated 1.3 fold. Loss of AP3 leads to hippocampal granule deficiency in mice deficient in this component [55]. A number of so-called SNARE proteins and general membrane traffic components including SEC22 and SEC24 were also upregulated. These latter two proteins participate in protein transport from the endoplasmic reticulum to the Golgi complex.

Multiple kinesin, myosin and dynein motors were upregulated, perhaps to compensate for the inhibition of vesicle motility characteristic of cells lacking NPC1 function [56,57]. Additional cytoskeletal regulatory proteins including annexin A13 and A6, ankyrin2, several Rho GTPase activating proteins and actin related protein 3 were all upregulated. Many of these changes likely reflect compensatory responses to cholesterol and sphingolipid accumulation-triggered defects.

**Table 4.** Genes involved in oxidative stress that are upregulated in NPC fibroblasts.

| Accession number | Symbol  | Name                                                               | Fold Change | False Discovery Rate |
|------------------|---------|--------------------------------------------------------------------|-------------|----------------------|
| AI039375         | ALDH7A1 | Aldehyde dehydrogenase 7 family, member A1                         | 1.5         | 0.7                  |
| AI301973         | CHGA    | Chromogranin A (parathyroid secretory protein 1)                   | 2.1         | 0                    |
| AA463492         | CYBB    | Cytochrome b-245, beta polypeptide (chronic granulomatous disease) | 1.4         | 2.4                  |
| AA508838         | DDAH1   | Dimethylarginine dimethylaminohydrolase 1                          | 2           | 0.1                  |
| AI271623         | DUOX1   | Dual oxidase 1                                                     | 1.4         | 4.5                  |
| AA664180         | GPX3    | Glutathione peroxidase 3 (plasma)                                  | 2.5         | 0                    |
| AA290737         | GSTM2   | Glutathione S-transferase M2 (muscle)                              | 1.5         | 1.9                  |
| AI648396         | HMOX1   | Heme oxygenase (decycling) 1                                       | 1.6         | 3.6                  |
| N66278           | JUND    | Jun D proto-oncogene                                               | 1.8         | 0.4                  |
| AI745626         | MT1G    | Metallothionein 1G                                                 | 1.7         | 0.2                  |
| AI362950         | MT3     | Metallothionein 3 (growth inhibitory factor (neurotrophic))        | 1.4         | 0.7                  |
| AA969460         | NCF4    | Neutrophil cytosolic factor 4, 40kDa                               | 1.9         | 0.2                  |
| H01039           | NOS3    | Nitric oxide synthase 3 (endothelial cell)                         | 1.8         | 0.1                  |
| AA405415         | TXNRD1  | Thioredoxin reductase 1                                            | 1.6         | 0.4                  |
| AI185559         | TXNRD3  | Thioredoxin reductase 3                                            | 1.4         | 0.8                  |

DOI: 10.1371/journal.pone.0000019.t004

## CONCLUSIONS

Gene expression analysis of fibroblasts from patients with Niemann-Pick type C have revealed many intriguing similarities with classic neurodegenerative diseases. Further study of newly identified candidate genes are likely to reveal important clues to the pathophysiology of this genetic disorder.

## MATERIALS AND METHODS

### Cells

NPC1<sup>I1061T</sup> homozygous fibroblasts GM18453, GM17909 and the heterozygous GM03123 fibroblast cell line containing the I1061T mutation were obtained from Coriell cell repositories (Camden, NJ.) and NPC1<sup>I1061T</sup> homozygous fibroblasts 83.16 and 59413 were obtained from Dr. John O'Brien (Mayo Clinic, Rochester, MN). Normal skin fibroblasts AG10803, GM09503, GM05659 and GM03726 were obtained from the Coriell Cell Repository. All fibroblasts were cultured in DMEM containing 10% fetal bovine serum. Cells were harvested at 50–70% confluency.

### Microarray procedures and Data analysis

mRNA was isolated with the FastTrack 2.0 mRNA isolation kit according to the manufacturer's instructions (Invitrogen, Carlsbad, CA). A reference RNA comprised of 10 cell lines was used as the control for each hybridized sample (Stratagene, La Jolla, CA). Both sample and reference RNAs were amplified using the MessageAmp II aRNA amplification kit (Ambion, Austin, TX). Human cDNA microarrays consisting of ~43,000 elements were obtained from the Stanford University functional genomics facility [58]. Hybridizations were conducted essentially as described [59]. The selected genes had >2 fold intensity ratio/background and were measurable in at least 80% of the data set. The resulting output was grouped by hierarchical clustering [60]. The two sets of genes were analyzed by significance analysis of microarrays (SAM) using 100 iterations in the two-class, unpaired data option [12].

### Immunoblots

Normal (AG10803) or NPC (GM03123) skin fibroblasts were washed 3 times with PBS, followed by incubation with RIPA buffer for 15 min. Lysates were centrifuged at 100,000 x g for

10 min and equal amounts of protein were analysed by immunoblot using commercially available antibodies. Signals were detected by chemiluminescence (Perkin Elmer Life Sciences Inc., Boston, MA). Antibodies and their sources were: Rabbit anti-FE65L1 (APPB2), Dr. Suzanne Guenette, Harvard Medical School; rabbit anti-BACE, Santa Cruz Biotechnology, Inc; Mouse anti-Nicastrin, BD transduction Laboratories; Rabbit anti-PSEN1 and APP-CT, Dr. William Mobley, Stanford School of Medicine.

### Data deposition

Original microarray data have been deposited in the Stanford Microarray Database: <http://smd.stanford.edu>

## SUPPORTING INFORMATION

**Table S1** Gene encoding channels, transporters and solute carriers that are upregulated in NPC fibroblasts.

Found at: doi:10.1371/journal.pone.0000019.s001 (0.07 MB DOC)

**Table S2** Genes involved in metal transport and homeostasis that are upregulated in NPC fibroblasts.

Found at: doi:10.1371/journal.pone.0000019.s002 (0.03 MB DOC)

**Table S3** Genes involved in membrane traffic and the cytoskeleton that are upregulated in NPC fibroblasts.

Found at: doi:10.1371/journal.pone.0000019.s003 (0.09 MB DOC)

**Dataset S1** This excel file presents SAM results for this data set, sorted alphabetically. False discovery rates are all <2%.

Found at: doi:10.1371/journal.pone.0000019.s004 (2.47 MB XLS)

## ACKNOWLEDGMENTS

Thanks to Drs. Gilbert Chu, Patrick Brown, Annika Saaf, and other members of the Brown lab for critical advice.

## Author Contributions

Conceived and designed the experiments: SP JR IG. Performed the experiments: JR IG. Analyzed the data: SP JR IG. Wrote the paper: SP JR

## REFERENCES

1. Vanier MT, Millat G (2003) Niemann-Pick disease type C. *Clin. Genet.* 64: 269–281.
2. Sturley SL, Patterson MC, Balch W, Liscum L (2004) The pathophysiology and mechanisms of NP-C disease. *Biochim Biophys Acta* 1685: 83–87.
3. Carstea ED, Morris JA, Coleman KG, Loftus SK, Zhang D, et al. (1997) Niemann-Pick C1 disease gene: homology to mediators of cholesterol homeostasis. *Science* 277: 228–231.
4. Sever N, Yang T, Brown MS, Goldstein JL, DeBose-Boyd RA (2003) Accelerated degradation of HMG CoA reductase mediated by binding of insig-1 to its sterol-sensing domain. *Mol Cell* 11: 25–33.
5. Hua X, Nohturfft A, Goldstein JL, Brown MS (1996) Sterol resistance in CHO cells traced to point mutation in SREBP cleavage-activating protein. *Cell* 87: 415–426.
6. Martin V, Carrillo G, Torroja C, Guerrero I (2001) The sterol-sensing domain of Patched protein seems to control Smoothed activity through Patched vesicular trafficking. *Curr Biol* 11: 601–607.
7. Strutt H, Thomas C, Nakano Y, Stark D, Neave B, et al. (2001) Mutations in the sterol-sensing domain of Patched suggest a role for vesicular trafficking in Smoothed regulation. *Curr Biol* 11: 608–613.
8. Altmann SW, Davis Jr HR, Zhu LJ, Yao X, Hoos LM, et al. (2004) Niemann-Pick C1 Like 1 protein is critical for intestinal cholesterol absorption. *Science* 303: 1201–1204.
9. Ohgami N, Ko DC, Thomas M, Scott MP, Chang CC, et al. (2004) Binding between the Niemann-Pick C1 protein and a photoactivatable cholesterol analog requires a functional sterol-sensing domain. *Proc Natl Acad Sci U S A* 101: 12473–12478.
10. Millat G, Marçais C, Rafi MA, Yamamoto T, Morris JA, et al. (1999) Niemann-Pick C1 disease: the I1061T substitution is a frequent mutant allele in patients of Western European descent and correlates with a classic juvenile phenotype. *Am J Hum Genet* 65: 1321–1329.
11. Park WD, O'Brien JF, Lundquist PA, Kraft DL, Vockley CW, et al. (2003) Identification of 58 novel mutations in Niemann-Pick disease type C: correlation with biochemical phenotype and importance of PTC1-like domains in NPC1. *Hum Mutat* 22: 313–325.
12. Tusher VG, Tibshirani R, Chu G (2001) Significance analysis of microarrays applied to the ionizing radiation response. *Proc Natl Acad Sci USA* 98: 5116–5121.
13. Blom TS, Linder MD, Snow K, Pihko H, Hess MW, et al. (2003) Defective endocytic trafficking of NPC1 and NPC2 underlying infantile Niemann-Pick type C disease. *Hum Mol Genet* 12: 257–272.
14. Klein A, Amigo L, Retamal MJ, Morales MG, Miquel JF, et al. (2006) NPC2 is expressed in human and murine liver and secreted into bile: potential implications for body cholesterol homeostasis. *Hepatology* 43: 126–33.
15. Maxfield FR, Tabas I (2005) Role of cholesterol and lipid organization in disease. *Nature* 438: 612–621.
16. Horton JD, Goldstein JL, Brown MS (2002) SREBPs: activators of the complete program of cholesterol and fatty acid synthesis in the liver. *J Clin Invest* 109: 1125–1130.

17. Liscum L, Faust JR (1987) Low density lipoprotein (LDL)-mediated suppression of cholesterol synthesis and LDL uptake is defective in Niemann-Pick type C fibroblasts. *J Biol Chem* 262: 17002–17008.
18. Frolov A, Zielinski SE, Crowley JR, Dudley-Rucker N, Schaffer JE, et al. (2003) NPC1 and NPC2 regulate cellular cholesterol homeostasis through generation of low density lipoprotein cholesterol-derived oxysterols. *J Biol Chem* 278: 25517–25525.
19. Choi HY, Karten B, Chan T, Vance JE, Greer WL, et al. (2003) Impaired ABCA1-dependent lipid efflux and hypoalphalipoproteinemia in human Niemann-Pick type C disease. *J Biol Chem* 278: 32569–32577.
20. Abe-Dohmae S, Ikeda Y, Matsuo M, Hayashi M, Okuhira K, et al. (2004) Human ABCA7 supports apolipoprotein-mediated release of cellular cholesterol and phospholipid to generate high density lipoprotein. *J Biol Chem* 279: 604–611.
21. Olkkonen VM, Levine TP (2004) Oxysterol binding proteins: in more than one place at one time? *Biochem Cell Biol* 82: 87–98.
22. Yamazaki T, Chang TY, Haass C, Ihara Y (2001) Accumulation and aggregation of amyloid beta-protein in late endosomes of Niemann-pick type C cells. *J Biol Chem* 276: 4454–4460.
23. Runz H, Rietdorf J, Tomic I, de Bernard M, Beyreuther K, et al. (2002) Inhibition of intracellular cholesterol transport alters presenilin localization and amyloid precursor protein processing in neuronal cells. *J Neurosci* 22: 1679–1689.
24. Burns M, Gaynor K, Olm V, Mercken M, LaFrancois J, et al. (2003) Presenilin redistribution associated with aberrant cholesterol transport enhances beta-amyloid production in vivo. *J Neurosci* 23: 5645–5649.
25. Vincent I, Bird T (2004) Intracellular accumulation of amyloidogenic fragments of amyloid-beta precursor protein in neurons with Niemann-Pick type C defects is associated with endosomal abnormalities. *Am J Pathol* 164: 975–985.
26. Guenette SY, Chen J, Jondro PD, Tanzi RE (1996) Association of a novel human FE65-like protein with the cytoplasmic domain of the beta-amyloid precursor protein. *Proc Natl Acad Sci USA* 93: 10832–10837.
27. Chang Y, Tesco G, Jeong WJ, Lindsley L, Eckman EA, et al. (2003) Generation of the beta-amyloid peptide and the amyloid precursor protein C-terminal fragment gamma are potentiated by FE65L1. *J Biol Chem* 278: 51100–51107.
28. Grimm MO, Grimm HS, Patzold AJ, Zinser EG, Halonen R, et al. (2005) Regulation of cholesterol and sphingomyelin metabolism by amyloid-beta and presenilin. *Nat Cell Biol* 7: 1118–1123.
29. Cam JA, Zerbini CV, Li Y, Bu G (2005) Rapid endocytosis of the low density lipoprotein receptor-related protein modulates cell surface distribution and processing of the beta-amyloid precursor protein. *J Biol Chem* 280: 15464–15470.
30. Kamal A, Stokin GB, Yang Z, Xia CH, Goldstein LS (2000) Axonal transport of amyloid precursor protein is mediated by direct binding to the kinesin light chain subunit of kinesin-I. *Neuron* 28: 449–459.
31. Muresan Z, Muresan V (2005) Coordinated transport of phosphorylated amyloid-beta precursor protein and c-Jun NH2-terminal kinase-interacting protein-1. *J Cell Biol* 171: 615–25.
32. LaFerla FM (2002) Calcium dyshomeostasis and intracellular signalling in Alzheimer's disease. *Nat Rev Neurosci* 3: 862–872.
33. Jayakumar M, Dwek RA, Butters TD, Platt FM (2005) Storage solutions: treating lysosomal disorders of the brain. *Nat Rev Neurosci* 6: 713–725.
34. Mattson MP, Cheng B, Davis D, Bryant K, Lieberburg I, et al. (1992) beta-Amyloid peptides destabilize calcium homeostasis and render human cortical neurons vulnerable to excitotoxicity. *J Neurosci* 12: 376–389.
35. Ueda K, Shinohara S, Yagami T, Asakura K, Kawasaki K (1997) Amyloid beta protein potentiates Ca<sup>2+</sup> influx through L-type voltage-sensitive Ca<sup>2+</sup> channels: a possible involvement of free radicals. *J Neurochem* 68: 265–271.
36. Ekinici FJ, Malik KU, Shea TB (1999) Activation of the L voltage-sensitive calcium channel by mitogen-activated protein (MAP) kinase following exposure of neuronal cells to beta-amyloid. MAP kinase mediates beta-amyloid-induced neurodegeneration. *J Biol Chem* 274: 30322–30327.
37. Arispe N, Pollard HB, Rojas E (1993) Giant multilevel cation channels formed by Alzheimer disease amyloid beta-protein [A beta P-(1–40)] in bilayer membranes. *Proc Natl Acad Sci USA* 90: 10573–10577.
38. Auer IA, Schmidt ML, Lec VM, Curry B, Suzuki K, et al. (1995) Paired helical filament tau (PHFtau) in Niemann-Pick type C disease is similar to PHFtau in Alzheimer's disease. *Acta Neuropathol (Berl)* 90: 547–551.
39. Correas I, Diaz-Nido J, Avila J (1992) Microtubule-associated protein tau is phosphorylated by protein kinase C on its tubulin binding domain. *J Biol Chem* 267: 15721–15728.
40. Reynolds CH, Betts JC, Blackstock WP, Nebreda AR, Anderton BH (2000) Phosphorylation sites on tau identified by nanoelectrospray mass spectrometry: differences in vitro between the mitogen-activated protein kinases ERK2, c-Jun N-terminal kinase and P38, and glycogen synthase kinase-3beta. *J Neurochem* 74: 1587–1595.
41. Tomizawa K, Omori A, Ohtake A, Sato K, Takahashi M (2001) Tau-tubulin kinase phosphorylates tau at Ser-208 and Ser-210, sites found in paired helical filament-tau. *FEBS Lett* 492: 221–227.
42. Yang LS, Ksiazek-Reding H (1999) Ca<sup>2+</sup> and Mg<sup>2+</sup> selectively induce aggregates of PHF-tau but not normal human tau. *J Neurosci Res* 55: 36–43.
43. Appelt DM, Balin BJ (1997) The association of tissue transglutaminase with human recombinant tau results in the formation of insoluble filamentous structures. *Brain Res* 745: 21–31.
44. Johnson GV, Cox TM, Lockhart JP, Zimmerman MD, Miller ML, et al. (1997) Transglutaminase activity is increased in Alzheimer's disease brain. *Brain Res* 751: 323–329.
45. Andersen JK (2004) Oxidative stress in neurodegeneration: cause or consequence? *Nat Med* 10: Suppl: S18–S25.
46. Brion JP, Couck AM, Bruce M, Anderton B, Flament-Durand J (1991) Synaptophysin and chromogranin A immunoreactivities in senile plaques of Alzheimer's disease. *Brain Res* 539: 143–150.
47. Twig G, Graf SA, Messerli MA, Smith PJ, Yoo SH, et al. (2005) Synergistic amplification of beta-amyloid- and interferon-gamma-induced microglial neurotoxic response by the senile plaque component chromogranin A. *Am J Physiol Cell Physiol* 288: C169–175.
48. Lambeth JD (2004) NOX enzymes and the biology of reactive oxygen. *Nat Rev Immunol* 4: 181–189.
49. Chinopoulos C, Adam-Vizi V (2006) Calcium, mitochondria and oxidative stress in neuronal pathology. Novel aspects of an enduring theme. *FEBS J* 273: 433–450.
50. Smith MA, Harris PL, Sayre LM, Perry G (1997) Iron accumulation in Alzheimer disease is a source of redox-generated free radicals. *Proc Natl Acad Sci USA* 94: 9866–9868.
51. Lovell MA, Robertson JD, Teesdale WJ, Campbell JL, Markesbery WR (1998) Copper, iron and zinc in Alzheimer's disease senile plaques. *J Neurol Sci* 158: 47–52.
52. Ganley IG, Pfeffer SR (2006) Cholesterol accumulation sequesters Rab9 and disrupts late endosome function in NPC1-deficient cells. *J Biol Chem* 281: 17890–17899.
53. Cataldo AM, Barnett JL, Pieroni C, Nixon RA (1997) Increased neuronal endocytosis and protease delivery to early endosomes in sporadic Alzheimer's disease: neuropathologic evidence for a mechanism of increased beta-amyloidogenesis. *J Neurosci* 17: 6142–6151.
54. Hook V, Toneff T, Bogyo M, Greenbaum D, Medzihradsky KF, et al. (2005) Inhibition of cathepsin B reduces beta-amyloid production in regulated secretory vesicles of neuronal chromaffin cells: evidence for cathepsin B as a candidate beta-secretase of Alzheimer's disease. *Biol Chem* 386: 931–940.
55. Li W, Rusiniak ME, Chintala S, Gautam R, Novak EK, et al. (2004) Murine Hermansky-Pudlak syndrome genes: regulators of lysosome-related organelles. *BioEssays* 26: 616–628.
56. Ko DC, Gordon MD, Jin JY, Scott MP (2001) Dynamic movements of organelles containing Niemann-Pick C1 protein: NPC1 involvement in late endocytic events. *Mol Biol Cell* 12: 601–614.
57. Zhang M, Dwyer NK, Love DC, Cooney A, Comly M, et al. (2001) Cessation of rapid late endosomal tubulovesicular trafficking in Niemann-Pick type C1 disease. *Proc Natl Acad Sci USA* 98: 4466–4471.
58. Sherlock G, Hernandez-Boussard T, Kasarskis A, Binkley G, Matese JC, et al. (2001) The Stanford Microarray Database. *Nucleic Acids Res* 29: 152–155.
59. Alizadeh AA, Eisen MB, Davis RE, Ma C, Lossos, et al. (2000) Distinct types of diffuse large B-cell lymphoma identified by gene expression profiling. *Nature* 403: 503–511.
60. Eisen MB, Spellman PT, Brown PO, Botstein D (1998) Cluster analysis and display of genome-wide expression patterns. *Proc Natl Acad Sci USA* 95: 14863–14868.
