# Supplementary material for: Clues to Neuro-Degeneration in Niemann-Pick Type C Disease from Global Gene Expression Profiling
Source: PLoS One. 2006 Dec 20;1(1):e19. doi: 10.1371/journal.pone.0000019 (PMC1762405; doi:10.1371/journal.pone.0000019)
Supplement: Dataset S1 — This excel file presents SAM results for this data set, sorted alphabetically. False discovery rates are all <2%. (2.47 MB XLS) [file pone.0000019.s004.xls]

## Sheet: Sheet1
Gene Name	Fold Change	False discovery rate (%)
|| || || || || || 306804	1.46403	0.94976
|| || || || || || 306806	1.49079	0.803811
|| || || || || || 306811	1.94548	0
|| || || || || || 306813	1.39396	1.16101
|| || || || || || 306815	2.42619	0
|| || || || || || 306818	1.66781	0.185724
|| || || || || || 306819	1.37681	1.47707
|| || || || || || 306822	1.92826	0
|| || || || || || 306825	1.33489	0.803811
|| || || || || || 306826	1.82305	0.247501
|| || || || || || 309551	1.78311	0.185724
|| || || || || || 310693	1.40545	1.62173
|| || || || || || 472876	1.66116	0.542583
|| || || AA002258 || || || 103216	1.49004	0.94976
|| || || AA004582 || || || 110689	1.37224	1.87613
|| || || AA024897 || || || 110382	1.65134	0.185724
|| || || AA044664 || || || 114202	1.85122	0
|| || || AA121141 || || || 116202	1.60295	1.62173
|| || || AA150487 || || || 98890	1.86288	0.131852
|| || || AA164228 || || || 98356	1.96079	0
|| || || AA164412 || || || 116143	2.02123	0
|| || || AA195014 || || || 99315	1.38302	1.68793
|| || || AA228263 || || || 117086	1.58215	0.364305
|| || || AA229499 || || || 100595	2.18241	0.0990004
|| || || AA258057 || Unknown UG Hs.175511 ESTs sc_id827 || || 187293	1.34694	1.62173
|| || || AA278757 || || || 226826	1.69448	0.131852
|| || || AA284378 || Unknown UG Hs.193408 ESTs, Weakly similar to REGULATOR OF || || 185319	1.60249	0.451626
|| || || AA291169 || Unknown UG Hs.99706 EST || || 187749	1.61735	0.244054
|| || || AA398289 || || || 105592	1.45365	1.62173
|| || || AA401244 || || || 108043	1.45453	1.32401
|| || || AA406203 || || || 101978	1.44779	0.803811
|| || || AA410572 || || || 117607	1.65692	0.247501
|| || || AA410584 || || || 309992	1.53073	0.247501
|| || || AA411391 || || || 116683	2.49586	0.0990004
|| || || AA421646 || || || 308783	1.35549	1.68793
|| || || AA429215 || || || 101658	3.33781	0
|| || || AA431787 || || || 104756	1.44891	1.16101
|| || || AA446011 || || || 100297	1.71722	0.244054
|| || || AA455070 || || || 309070	1.45409	0.326679
|| || || AA459381 || || || 114469	2.27234	0
|| || || AA479055 || || || 101076	1.47564	1.68793
|| || || AA479362 || || || 112401	1.38905	1.62173
|| || || AA481425 || || || 112491	1.88081	0.185724
|| || || AA481935 || || || 108554	2.15232	0
|| || || AA484302 || || || 110738	2.59008	0
|| || || AA486807 || || || 114100	2.04681	0
|| || || AA489593 || || || 112923	1.6769	0
|| || || AA490612 || Unknown UG Hs.112864 ESTs sc_id2842 || || 163059	1.49429	0.704799
|| || || AA496132 || || || 117888	1.53416	0.244054
|| || || AA502625 || || || 105467	1.43491	1.87613
|| || || AA505588 || || || 113391	2.85025	0
|| || || AA514513 || || || 105206	1.35791	0.94976
|| || || AA521416 || || || 222884	1.39491	1.07143
|| || || AA523852 || || || 102182	2.13316	0
|| || || AA563806 || || || 107908	1.79003	0.131852
|| || || AA568247 || || || 116755	2.56291	0
|| || || AA573624 || || || 110988	1.64902	0.367894
|| || || AA580048 || || || 109495	1.95833	0.185724
|| || || AA581429 || || || 116377	1.58983	0.247501
|| || || AA582530 || || || 119307	1.40934	0.803811
|| || || AA594805 || || || 118282	1.30875	0.793728
|| || || AA599042 || || || 105439	1.41818	0.367894
|| || || AA608863 || || || 116181	1.60954	0.542583
|| || || AA609245 || || || 98935	1.52081	1.47707
|| || || AA609292 || || || 114532	1.3947	0.803811
|| || || AA609566 || || || 115052	1.47275	1.87613
|| || || AA609781 || || || 118546	1.31865	1.07143
|| || || AA609907 || || || 119524	1.40762	2.01742
|| || || AA610081 || || || 105457	1.43609	1.68793
|| || || AA620632 || || || 102390	1.90758	0.425188
|| || || AA620674 || || || 116830	1.35459	0.803811
|| || || AA620682 || || || 112773	1.43173	0.793728
|| || || AA620794 || || || 118414	1.4194	0.704799
|| || || AA620840 || || || 115719	1.41232	1.62173
|| || || AA621294 || || || 108076	1.35576	1.47707
|| || || AA621339 || || || 109473	1.40968	0.793728
|| || || AA621761 || || || 104990	1.61484	1.47707
|| || || AA626018 || || || 223233	1.56009	0.451626
|| || || AA626040 || || || 224527	1.24352	1.68793
|| || || AA628230 || || || 222672	2.01646	0
|| || || AA629617 || || || 105058	1.47026	1.07143
|| || || AA629838 || || || 119582	1.64403	0.367894
|| || || AA630214 || || || 112842	1.38129	1.32401
|| || || AA631004 || || || 112175	2.17209	0
|| || || AA635147 || || || 223736	1.43903	0.364305
|| || || AA644091 || || || 109158	1.67997	0.185724
|| || || AA653120 || || || 105974	1.84011	0.131852
|| || || AA653686 || || || 119578	2.14672	0
|| || || AA662117 || || || 117443	2.73963	0
|| || || AA668698 || || || 113859	1.85327	0.131852
|| || || AA669725 || || || 104633	1.6661	0.131852
|| || || AA670429 || || || 110839	1.59932	0.793728
|| || || AA676833 || || || 222698	1.41182	0.793728
|| || || AA677647 || || || 224936	1.30545	1.87613
|| || || AA678098 || || || 222988	1.37734	1.47707
|| || || AA679629 || || || 118989	1.50932	0.542583
|| || || AA679634 || || || 120560	1.42491	1.87613
|| || || AA682229 || || || 221582	1.35194	1.68793
|| || || AA682565 || || || 223452	1.61426	0.244054
|| || || AA687438 || || || 102450	2.32866	0
|| || || AA688217 || || || 112985	2.56492	0
|| || || AA694497 || || || 226343	1.34398	1.62173
|| || || AA700330 || || || 220734	1.33958	1.32401
|| || || AA700722 || || || 225836	1.38545	1.07143
|| || || AA702820 || || || 225956	1.35405	1.07143
|| || || AA702986 || || || 222164	1.33941	1.47707
|| || || AA705836 || || || 315854	1.74085	0
|| || || AA707784 || || || 226231	1.3422	1.62173
|| || || AA707915 || || || 116325	1.34555	1.68793
|| || || AA707920 || || || 118943	1.26995	1.87613
|| || || AA708243 || || || 308215	1.71757	0.131852
|| || || AA708285 || || || 309501	1.30421	1.47707
|| || || AA743933 || || || 101643	1.50939	0.247501
|| || || AA745659 || || || 106157	1.47683	1.16101
|| || || AA746175 || || || 110261	2.11384	0
|| || || AA757711 || || || 225831	1.30841	0.803811
|| || || AA757873 || || || 226395	1.37638	0.94976
|| || || AA772066 || || || 117734	2.42928	0
|| || || AA773548 || || || 104590	2.02321	0.244054
|| || || AA775149 || || || 106307	1.74522	0.247501
|| || || AA775211 || || || 113570	1.76589	0.185724
|| || || AA775732 || || || 310585	1.66928	0.247501
|| || || AA775799 || || || 220801	1.34721	1.32401
|| || || AA776797 || || || 315704	1.49463	0.244054
|| || || AA776825 || || || 224305	1.81513	0.185724
|| || || AA776844 || || || 223946	1.31968	2.01742
|| || || AA779153 || || || 222401	1.46974	1.07143
|| || || AA826514 || || || 104482	1.35293	1.87613
|| || || AA827293 || || || 107523	1.70228	0.185724
|| || || AA828818 || || || 102730	1.31691	1.68793
|| || || AA828959 || || || 107856	1.35111	1.68793
|| || || AA834497 || || || 110228	2.15866	0
|| || || AA862485 || || || 105189	1.64538	0.244054
|| || || AA865707 || || || 111395	1.38785	0.451626
|| || || AA872709 || || || 107655	1.50384	0.704799
|| || || AA873038 || || || 99913	1.58501	0.367894
|| || || AA877071 || || || 109806	2.14597	0
|| || || AA877935 || || || 103325	1.97033	0.131852
|| || || AA878772 || || || 100202	1.2703	2.01742
|| || || AA883200 || || || 221692	1.9187	0.131852
|| || || AA884244 || || || 317317	1.58093	0.704799
|| || || AA886349 || || || 311113	1.33511	1.62173
|| || || AA886897 || || || 118946	1.38817	0.803811
|| || || AA886921 || || || 314627	1.5006	0.704799
|| || || AA890136 || || || 117511	1.68196	0.425188
|| || || AA894817 || || || 105009	1.51375	1.47707
|| || || AA905059 || || || 308389	1.45213	0.364305
|| || || AA906386 || || || 308019	1.41179	0.425188
|| || || AA908801 || || || 220467	1.65176	0.185724
|| || || AA916080 || || || 115254	1.56301	0.451626
|| || || AA916322 || || || 317050	1.46884	0.542583
|| || || AA916780 || || || 223236	1.44832	0.793728
|| || || AA918626 || || || 103847	1.66348	0.185724
|| || || AA918647 || || || 116706	1.70612	0.425188
|| || || AA919035 || || || 310049	1.51013	0.793728
|| || || AA923631 || || || 109579	1.27811	1.68793
|| || || AA927040 || || || 307009	1.28501	1.87613
|| || || AA928321 || || || 314619	1.33377	1.68793
|| || || AA931414 || || || 114508	1.8468	0.131852
|| || || AA934831 || || || 113012	1.50495	0.94976
|| || || AA937574 || || || 120295	1.53026	0.425188
|| || || AA937785 || || || 310121	1.336	1.16101
|| || || AA938546 || || || 103030	1.76121	0.185724
|| || || AA969791 || || || 101828	1.58789	0.367894
|| || || AA974821 || || || 106063	1.37563	0.704799
|| || || AA974989 || || || 307911	1.54781	0.185724
|| || || AA975267 || || || 226174	1.27856	1.47707
|| || || AA985580 || || || 310809	1.68201	0.185724
|| || || AA991744 || || || 308914	1.31585	1.62173
|| || || AA992668 || || || 224490	1.36009	0.704799
|| || || AA999906 || || || 102622	2.01952	0
|| || || AI002390 || || || 307727	1.52941	0.326679
|| || || AI004164 || || || 99828	1.44057	0.793728
|| || || AI004631 || || || 307098	1.3999	0.94976
|| || || AI005051 || || || 120416	2.22118	0
|| || || AI015478 || || || 318558	1.37616	1.16101
|| || || AI016716 || || || 105698	1.46128	1.47707
|| || || AI017195 || || || 307448	1.33427	1.68793
|| || || AI018208 || || || 315371	1.80901	0
|| || || AI025943 || || || 307387	1.37519	0.367894
|| || || AI033961 || || || 318673	1.36801	1.62173
|| || || AI039161 || || || 312615	1.71374	0.0990004
|| || || AI049689 || || || 105138	1.52609	0.131852
|| || || AI049923 || || || 117533	2.34662	0
|| || || AI050091 || || || 109803	1.80982	0.131852
|| || || AI051493 || || || 319032	1.75957	0.247501
|| || || AI053995 || || || 113280	1.7517	0.247501
|| || || AI056438 || || || 317805	1.40695	1.07143
|| || || AI074172 || || || 106867	1.35526	1.16101
|| || || AI075329 || || || 117358	2.00865	0
|| || || AI079632 || || || 316931	1.36244	2.01742
|| || || AI079787 || || || 317065	1.42235	0.704799
|| || || AI082711 || || || 318833	1.74987	0.131852
|| || || AI083527 || || || 310317	1.4565	0.803811
|| || || AI086414 || || || 318990	1.71311	0.185724
|| || || AI088183 || || || 311425	1.91295	0.131852
|| || || AI089583 || || || 317679	1.60503	0.131852
|| || || AI091654 || || || 319967	1.30504	1.87613
|| || || AI092582 || || || 316882	1.36922	1.47707
|| || || AI092654 || || || 317405	1.50845	0.803811
|| || || AI097617 || || || 319924	2.17215	0
|| || || AI123249 || || || 317087	1.78774	0
|| || || AI123396 || || || 319649	1.98529	1.47707
|| || || AI123732 || || || 307193	1.37795	0.94976
|| || || AI126877 || || || 318486	1.68086	0.326679
|| || || AI129107 || || || 315602	1.70565	0.185724
|| || || AI131501 || || || 315526	1.54344	0.367894
|| || || AI140795 || || || 308660	1.35791	2.01742
|| || || AI140860 || || || 311184	1.34425	1.32401
|| || || AI141551 || || || 313843	1.37646	1.68793
|| || || AI142434 || || || 311461	1.55149	0.185724
|| || || AI143066 || || || 312525	1.35638	1.87613
|| || || AI144001 || || || 318311	1.33104	1.32401
|| || || AI144128 || || || 317042	1.33817	2.01742
|| || || AI146354 || || || 314843	1.6367	0.367894
|| || || AI147061 || || || 312474	1.58741	0.94976
|| || || AI148233 || || || 306868	1.40907	1.47707
|| || || AI151105 || || || 312750	1.53453	0.185724
|| || || AI151385 || || || 331046	1.80419	0.131852
|| || || AI167637 || || || 317293	1.41392	0.704799
|| || || AI187194 || || || 313643	1.52197	0.244054
|| || || AI202908 || || || 313239	1.94203	0.185724
|| || || AI203272 || || || 316217	2.12955	0.131852
|| || || AI214913 || || || 312781	1.37875	1.62173
|| || || AI218581 || || || 318069	1.89104	0.326679
|| || || AI222520 || || || 319762	1.6631	0.131852
|| || || AI240278 || || || 314279	1.59801	0.131852
|| || || AI245689 || || || 316475	1.57313	0.451626
|| || || AI253193 || || || 100475	1.72029	0.704799
|| || || AI253669 || || || 118225	1.80024	0.425188
|| || || AI255007 || || || 99590	1.4376	0.94976
|| || || AI261606 || || || 104570	1.84653	0
|| || || AI261813 || || || 315469	1.66907	0.367894
|| || || AI261860 || || || 113796	1.50736	0.451626
|| || || AI262370 || || || 316765	1.63233	0.244054
|| || || AI262805 || || || 109519	1.62746	0.247501
|| || || AI264099 || || || 314060	1.46622	0.425188
|| || || AI265991 || || || 311733	2.25698	0
|| || || AI266426 || || || 311693	1.37559	1.16101
|| || || AI269677 || || || 309669	1.51803	0.803811
|| || || AI272896 || || || 314687	1.28519	1.68793
|| || || AI276500 || || || 318715	1.69249	0.185724
|| || || AI276527 || || || 319686	1.36269	1.16101
|| || || AI276654 || || || 319147	1.53051	0.451626
|| || || AI276770 || || || 317292	1.87563	0
|| || || AI276808 || || || 314467	2.10565	0
|| || || AI276882 || || || 313507	2.26296	0
|| || || AI277319 || || || 313441	1.73587	0.185724
|| || || AI278325 || || || 317578	1.58299	0.326679
|| || || AI280269 || || || 314624	1.53817	0.247501
|| || || AI284170 || || || 318931	1.45872	0.793728
|| || || AI288738 || || || 311551	1.43097	1.68793
|| || || AI289659 || || || 312490	1.43101	1.62173
|| || || AI291174 || || || 312530	2.43067	0
|| || || AI291598 || || || 319349	1.43845	1.07143
|| || || AI298953 || || || 313930	1.33415	1.87613
|| || || AI300362 || || || 317941	1.58804	1.32401
|| || || AI300909 || || || 311249	1.47776	0.704799
|| || || AI301513 || || || 319100	1.74906	0.131852
|| || || AI301734 || || || 314051	1.48002	1.87613
|| || || AI309037 || || || 314449	1.47143	0.326679
|| || || AI333299 || || || 317325	1.46081	0.793728
|| || || AI335817 || || || 319477	1.5544	0.542583
|| || || AI336401 || || || 311404	1.56313	0.185724
|| || || AI337424 || || || 309353	1.49485	0.793728
|| || || AI337874 || || || 311267	1.88827	0
|| || || AI337876 || || || 312611	1.56561	0.793728
|| || || AI338675 || || || 313192	1.3988	1.62173
|| || || AI340203 || || || 318837	1.85408	0.247501
|| || || AI340482 || || || 308320	1.51883	0.704799
|| || || AI348493 || || || 316636	1.49565	1.32401
|| || || AI350489 || || || 311725	2.15859	0
|| || || AI351056 || || || 313512	1.78656	0.244054
|| || || AI351975 || || || 311372	2.05566	0.185724
|| || || AI352188 || || || 319691	1.51936	1.07143
|| || || AI352512 || || || 317435	1.46591	1.07143
|| || || AI376113 || || || 311625	1.42314	0.364305
|| || || AI438958 || Unknown UG Hs.169638 Human placenta (Diff48) mRNA, complet || || 191208	2.02889	0
|| || || AI471079 || || || 314167	1.76391	0.247501
|| || || AI493835 || || || 318010	1.72152	0.704799
|| || || AI589966 || || || 330262	1.31938	1.47707
|| || || AI601142 || || || 331154	1.84989	0.185724
|| || || AI652285 || || || 315637	2.32764	0
|| || || AI675802 || || || 330892	1.54463	0.247501
|| || || AI688133 || || || 330438	1.45369	0.367894
|| || || AI698289 || || || 330773	1.72656	0.185724
|| || || AI732244 || || || 102271	1.43589	1.32401
|| || || AI732253 || || || 118985	1.39852	1.16101
|| || || AI820531 || || || 101607	1.58247	0.247501
|| || || AI820768 || || || 99114	2.22678	0
|| || || AI821004 || || || 117172	1.92734	0
|| || || AI821020 || || || 114047	1.68173	0.247501
|| || || AI822043 || || || 115926	1.40974	0.793728
|| || || AI822045 || || || 108192	1.3316	1.68793
|| || || AI951933 || || || 330643	1.3689	0.542583
|| || || AI991418 || || || 330815	1.6028	0.247501
|| || || AW055017 || || || 330861	1.90001	0.131852
|| || || AW074896 || || || 330762	1.52237	0.131852
|| || || H23037 || || || 105375	1.50792	0.542583
|| || || H53316 || || || 107667	1.34896	1.68793
|| || || H57480 || || || 116715	1.49275	1.62173
|| || || H62922 || || || 307825	1.40471	0.542583
|| || || H73561 || || || 308447	1.92264	0
|| || || H78181 || || || 112980	1.42681	0.94976
|| || || H80633 || || || 114002	1.5926	0.793728
|| || || H87106 || || || 103040	1.38462	0.704799
|| || || H98194 || || || 306959	1.36046	0.542583
|| || || H99120 || || || 225337	1.3874	2.01742
|| || || N25555 || || || 106313	1.7575	0
|| || || N34563 || || || 113490	1.65751	0.131852
|| || || N35614 || || || 220486	1.32908	1.87613
|| || || N36812 || || || 106434	1.39705	1.62173
|| || || N38990 || || || 102516	1.70201	0.185724
|| || || N45681 || || || 309668	1.48278	0.542583
|| || || N46324 || || || 108537	1.5053	0.367894
|| || || N47355 || || || 221451	1.47609	0.451626
|| || || N49895 || || || 103337	1.30419	1.07143
|| || || N50792 || || || 308460	1.57852	0.425188
|| || || N50959 || || || 116145	1.3824	1.07143
|| || || N51663 || || || 308799	1.3106	1.87613
|| || || N52535 || || || 99707	1.39277	0.94976
|| || || N54395 || || || 117630	1.34785	1.68793
|| || || N59220 || || || 308365	1.85091	0.185724
|| || || N59866 || || || 100556	2.27796	0.326679
|| || || N62499 || || || 220895	1.32506	1.87613
|| || || N62716 || || || 221631	1.35306	2.01742
|| || || N62876 || || || 309329	1.516	0.425188
|| || || N63479 || || || 308776	1.98035	0.131852
|| || || N66138 || || || 225101	1.7107	0.793728
|| || || N66607 || || || 103566	1.62125	0.364305
|| || || N72313 || || || 99236	1.42734	1.16101
|| || || N75727 || || || 102140	1.47532	1.62173
|| || || N90595 || || || 103653	1.43014	0.542583
|| || || N92085 || || || 102692	1.29015	1.32401
|| || || N95139 || || || 108555	1.37567	1.47707
|| || || R01643 || || || 308033	1.31065	1.68793
|| || || R06711 || || || 109894	1.42402	0.94976
|| || || R06861 || || || 99720	1.41245	0.793728
|| || || R07484 || || || 308922	1.41451	0.704799
|| || || R08261 || || || 118352	1.35815	1.68793
|| || || R10451 || || || 106806	1.9554	0.131852
|| || || R20650 || || || 98416	1.47638	0.367894
|| || || R22029 || || || 309143	1.35856	1.07143
|| || || R22856 || || || 115528	1.29937	1.62173
|| || || R25203 || || || 310555	1.37319	0.803811
|| || || R25375 || || || 103681	1.44864	1.47707
|| || || R25992 || || || 316524	1.71987	0.131852
|| || || R27244 || || || 308217	1.72126	0.244054
|| || || R28068 || || || 307637	1.95435	0.0990004
|| || || R33855 || || || 104030	1.35248	2.01742
|| || || R35979 || || || 110056	1.54716	0.364305
|| || || R39454 || || || 310296	1.51712	0.425188
|| || || R63528 || || || 111968	1.53479	0.131852
|| || || R64103 || || || 99436	1.45107	0.704799
|| || || R66806 || || || 309594	1.5549	0.364305
|| || || R66922 || || || 115466	1.31319	1.87613
|| || || R68682 || || || 111498	1.31681	1.16101
|| || || R70473 || || || 119612	1.31165	2.01742
|| || || R76498 || || || 109487	1.71382	0.244054
|| || || R77293 || CD54=ICAM-1 || || 108510	1.35311	0.803811
|| || || R78565 || || || 119610	1.86609	0
|| || || R81827 || || || 121483	1.47881	0.244054
|| || || R82024 || || || 308646	1.31758	1.87613
|| || || R86216 || || || 308912	1.28447	2.01742
|| || || T62969 || || || 120843	1.39322	0.793728
|| || || T67136 || || || 118018	1.44003	0.425188
|| || || T83842 || || || 116159	1.42741	0.364305
|| || || T91080 || || || 110513	1.70873	0.131852
|| || || T95975 || H.sapiens mRNA for HCGIX protein || || 246838	1.46359	0.364305
|| || || T97546 || || || 100674	1.38983	0.704799
|| || || T98389 || || || 310471	2.03517	0
|| || || T98784 || || || 98387	1.36066	1.62173
|| || || W15574 || || || 109881	1.48467	1.68793
|| || || W37857 || || || 309346	1.78164	0
|| || || W44701 || IL-3 receptor alpha chain || || 104741	2.65288	0
|| || || W46575 || || || 102620	1.39723	0.793728
|| || || W86423 || || || 98762	1.58796	0.185724
|| || || W86464 || || || 101737	1.27533	1.16101
|| || || W96205 || || || 106690	1.56344	0.185724
|| || || W96463 || || || 100720	1.68931	0.367894
|| **CDNA clone IMAGE:5217021, with apparent retained intron || Hs.550698 || AA458882 || || || 117973	1.90046	0.244054
|| **Full-length cDNA clone CS0DB003YO16 of Neuroblastoma Cot 10-normalized of Homo sapiens (human) || Hs.533437 || AA460930 || || || 309624	1.38763	1.47707
|| **Hypothetical LOC387977 || Hs.143441 || N45575 || || 387977 || 306971	1.50054	0.364305
|| **Immunoglobulin heavy chain V region (Humha448) || Hs.383169 || R36263 || || || 107291	1.45817	0.367894
|| **MRNA; cDNA DKFZp667E1010 (from clone DKFZp667E1010) || Hs.145130 || AA412499 || || || 107829	1.75605	0.131852
|| **Similar to hypothetical protein FLJ38374 || Hs.516952 || AA425016 || || 400840 || 108477	1.48159	0.326679
|| **Similar to tripartite motif-containing 43 || Hs.528594 || AA046498 || || 390233 || 109644	1.65074	0.326679
|| **Transcribed locus || Hs.205066 || AA284803 || || || 108384	1.32439	1.87613
|| **Transcribed locus || Hs.547709 || AA621827 || || || 117132	1.364	2.01742
|| **Transcribed locus, moderately similar to NP_055301.1 neuronal thread protein AD7c-NTP [Homo sapiens] || Hs.536416 || AI049575 || || || 119663	1.40482	1.07143
|| **Transcribed locus, moderately similar to XP_040486.4 zinc finger, matrin type 1 [Homo sapiens] || Hs.471338 || AA035343 || || || 220448	1.84672	0
|| **Transcribed locus, moderately similar to XP_361640.1 Magnaporthe grisea 70-15 MG04114.4 gene || Hs.208372 || AA424957 || || || 100800	1.42594	0.367894
|| **Transcribed locus, strongly similar to NP_002334.1 lactotransferrin [Homo sapiens] || Hs.518419 || AA156736 || || || 113894	1.37403	1.07143
|| **Transcribed locus, strongly similar to XP_507735.1 similar to hypothetical protein [Pan troglodytes] || Hs.499297 || AI732269 || || || 113666	1.56984	0.793728
|| **Transcribed locus, strongly similar to XP_522077.1 similar to MGC35521 protein [Pan troglodytes] || Hs.523816 || AA284281 || || || 111110	1.43225	1.47707
|| **Transcribed locus, weakly similar to NP_000769.1 cytochrome P450, family 4, subfamily A, polypeptide 11 [Homo sapiens] || Hs.543214 || W84867 || || || 100968	1.61773	0
|| **Transcribed locus, weakly similar to XP_513408.1 similar to origin recognition complex, subunit 1; origin recognition complex, subunit 1, S. cerevisiae, homolog-like; origin recognition complex 1; r || Hs.44098 || N29850 || || || 102067	1.67503	0.451626
|| *mitoch. cont. **Homo sapiens cDNA FLJ32297 fis, clone PROST2001899, highly similar to Human Rar protein mRNA || || || || || 433354	1.39822	1.87613
|| *mitoch. cont. || || || || || 433303	1.55358	2.01742
|| *mitoch. cont. || || || || || 433321	1.85157	0.185724
|| *mitoch. cont. || || || || || 433325	1.43989	1.87613
|| *mitoch. cont. || || || || || 433374	1.63548	0.367894
|| *mitoch. cont. ESTs || || || || || 433356	1.51842	0.803811
|| *mitoch. cont. wingless-type MMTV integration site family, member 5A || || || || || 433328	1.85883	0.185724
|| Breast cancer antigen 32004 mRNA, partial sequence || Hs.550181 || R36138 || || || 113786	1.49403	0.244054
|| CAMP-binding guanine nucleotide exchange factor IV (cAMP-GEFIV) mRNA, clone W15, partial sequence || Hs.529001 || W15542 || || || 102174	1.802	0.131852
|| CDNA clone IMAGE:30332316, partial cds || Hs.143408 || AA456631 || || || 102186	1.41305	0.803811
|| CDNA clone IMAGE:4557810, partial cds || Hs.98587 || AA460313 || || || 110403	1.67756	0.185724
|| CDNA clone IMAGE:4611512, partial cds || Hs.66194 || AA975145 || || || 98943	1.65775	0.244054
|| CDNA clone IMAGE:4687481, partial cds || Hs.112553 || AA602992 || || || 106550	1.29818	1.47707
|| CDNA clone IMAGE:4794876, partial cds || Hs.356239 || N48348 || || || 224029	1.54063	0.425188
|| CDNA clone IMAGE:4816339, partial cds || Hs.254117 || N63099 || || || 117961	1.51552	0.247501
|| CDNA clone IMAGE:5266242, partial cds || Hs.187018 || AA994594 || || || 316316	1.49047	0.244054
|| CDNA FLJ12376 fis, clone MAMMA1002494 || Hs.124652 || AA857628 || || || 101288	1.43023	0.704799
|| CDNA FLJ12425 fis, clone MAMMA1003104 || Hs.388565 || AA868042 || || || 224856	1.48453	0.364305
|| CDNA FLJ14942 fis, A-PLACE1011185 || Hs.506182 || AA905925 || || || 223558	1.55763	0.542583
|| CDNA FLJ23791 fis, clone HEP21711 || Hs.547943 || R33659 || || || 308586	1.54753	0.185724
|| CDNA FLJ25081 fis, clone CBL07659 || Hs.549573 || AI092274 || || || 317865	1.84692	0.131852
|| CDNA FLJ25860 fis, clone CBR01771 || Hs.436787 || AA129561 || || || 111641	1.79339	0.185724
|| CDNA FLJ26096 fis, clone SLV00701 || Hs.442702 || W86910 || || || 225659	1.78311	0
|| CDNA FLJ26950 fis, clone RCT08544 || Hs.444300 || AA609482 || || || 115666	1.48025	0.364305
|| CDNA FLJ30581 fis, clone BRAWH2007069 || Hs.145569 || AI262148 || || || 105547	2.16634	0
|| CDNA FLJ30906 fis, clone FEBRA2006055 || Hs.180711 || AA426030 || || || 102984	1.31299	1.68793
|| CDNA FLJ31249 fis, clone KIDNE2005327 || Hs.519749 || AI340148 || || || 316156	1.5589	0.326679
|| CDNA FLJ32121 fis, clone PEBLM1000083 || Hs.314372 || T67444 || || || 118648	1.39252	1.07143
|| CDNA FLJ33158 fis, clone UTERU2000418 || Hs.62314 || N50419 || || || 227051	1.56871	0.244054
|| CDNA FLJ33419 fis, clone BRACE2019877 || Hs.293672 || N36927 || || || 220369	1.49581	0.94976
|| CDNA FLJ34261 fis, clone FEBRA2001772 || Hs.519558 || AI301670 || || || 312732	1.80745	0.131852
|| CDNA FLJ34358 fis, clone FEBRA2013905 || Hs.102679 || N52937 || || || 310085	1.99145	0.244054
|| CDNA FLJ34482 fis, clone HLUNG2004067 || Hs.547489 || W94041 || || || 104770	1.60338	1.07143
|| CDNA FLJ35971 fis, clone TESTI2013257 || Hs.177930 || AA394186 || || || 114118	1.47242	1.47707
|| CDNA FLJ37989 fis, clone CTONG2011676 || Hs.363342 || AI299358 || || || 312163	1.44614	0.425188
|| CDNA FLJ38107 fis, clone D3OST2001669 || Hs.145411 || AI253622 || || || 117985	1.5757	1.16101
|| CDNA FLJ42069 fis, clone SYNOV2011233 || Hs.444174 || AA935724 || || || 98423	1.53154	0.326679
|| CDNA FLJ43356 fis, clone NT2RP7011909, weakly similar to Homo sapiens X-linked retinopathy protein || Hs.458623 || AA620309 || || || 120309	1.61322	0.326679
|| CDNA FLJ43453 fis, clone OCBBF2034333 || Hs.302350 || N39434 || || || 117308	1.90433	0
|| CDNA FLJ44134 fis, clone THYMU2008876 || Hs.156414 || AI339738 || || || 317684	1.68854	0.185724
|| CDNA FLJ45825 fis, clone NT2RP8003657 || Hs.199962 || AA444002 || || || 100018	1.91337	0.326679
|| CDNA FLJ46900 fis, clone UTERU3022922 || Hs.126951 || AI206175 || || || 315339	1.62825	0.793728
|| CDNA: FLJ23006 fis, clone LNG00414 || Hs.79881 || AA121366 || || || 104439	1.5812	0.367894
|| Clone 161455-2-3 B cell expressed mRNA from chromosome X. || Hs.496916 || H25551 || || || 116435	1.38092	1.47707
|| Clone BCSynL21 immunoglobulin lambda light chain variable region mRNA, partial cds || Hs.542471 || AA582497 || || || 106452	2.22638	0
|| Clone IMAGE:205688, mRNA sequence || Hs.508364 || T98842 || || || 112684	1.31248	1.87613
|| Clone TESTIS-750 mRNA sequence || Hs.545676 || AA411988 || || || 117917	1.27362	1.68793
|| Clone TUA8 Cri-du-chat region mRNA || Hs.27621 || AA284237 || || || 102582	2.18327	0.185724
|| EST from clone 27306, 5' end || Hs.90221 || W72098 || || || 113745	1.40396	0.793728
|| Full length insert cDNA clone YI54B09 || Hs.536415 || R71323 || || || 99480	1.4048	1.07143
|| Full length insert cDNA clone ZA79D12 || Hs.102834 || AI822047 || || || 113078	2.21781	0
|| Full length insert cDNA clone ZB77E08 || Hs.55047 || N94447 || || || 117947	1.31678	1.87613
|| Full length insert cDNA clone ZB81B12 || Hs.102941 || N95440 || || || 107398	1.4473	0.247501
|| Full length insert cDNA clone ZC35F11 || Hs.355331 || AA284109 || || || 116106	1.45618	0.451626
|| Full length insert cDNA clone ZD63C05 || Hs.535261 || AA626131 || || || 220664	1.44608	0.704799
|| Full length insert cDNA clone ZD73D05 || Hs.134314 || W74123 || || || 111629	2.05774	0.131852
|| Full length insert cDNA YH77E09 || Hs.401842 || T60508 || || || 118839	1.28417	1.87613
|| Full-length cDNA clone CS0CAP002YO01 of Thymus of Homo sapiens (human) || Hs.370450 || AA044696 || || || 102150	1.59156	0.185724
|| Full-length cDNA clone CS0DC029YI23 of Neuroblastoma Cot 25-normalized of Homo sapiens (human) || Hs.177532 || AA099389 || || || 224475	1.55637	0.793728
|| Full-length cDNA clone CS0DF011YM22 of Fetal brain of Homo sapiens (human) || Hs.92290 || R22052 || || || 114692	1.32833	1.87613
|| Full-length cDNA clone CS0DI057YK09 of Placenta Cot 25-normalized of Homo sapiens (human) || Hs.405158 || AA705911 || || || 222515	1.33249	1.47707
|| Full-length cDNA clone CS0DN001YG07 of Adult brain of Homo sapiens (human) || Hs.549432 || H99650 || || || 101103	1.42561	1.32401
|| Homo sapiens, clone IMAGE:3453782, mRNA || Hs.535775 || AA644007 || || || 98579	1.52141	1.16101
|| Homo sapiens, clone IMAGE:3868989, mRNA, partial cds || Hs.42239 || AA421256 || || || 108313	1.32354	1.62173
|| Homo sapiens, clone IMAGE:4082361, mRNA || Hs.141003 || AI668616 || || || 106659	1.42067	1.32401
|| Homo sapiens, clone IMAGE:4347271, mRNA || Hs.547125 || AA521339 || || || 99973	1.62692	0.131852
|| Homo sapiens, clone IMAGE:4469683, mRNA || Hs.411402 || H96668 || || || 99460	1.67793	0.244054
|| Homo sapiens, clone IMAGE:4795773, mRNA || Hs.434275 || AA858107 || || || 103419	1.39074	1.16101
|| Homo sapiens, clone IMAGE:4801297, mRNA || Hs.458447 || AA151498 || || || 109295	1.44437	1.16101
|| Homo sapiens, clone IMAGE:4826152, mRNA || Hs.535619 || AA936147 || || || 317668	1.74609	0.244054
|| Homo sapiens, clone IMAGE:4829494, mRNA || Hs.528519 || N70739 || || || 98855	1.56868	0.185724
|| Homo sapiens, clone IMAGE:5167229, mRNA || Hs.518427 || AI205781 || || || 314250	1.51148	0.326679
|| Homo sapiens, clone IMAGE:5194204, mRNA || Hs.372009 || AA493270 || || || 113812	1.3237	1.87613
|| Homo sapiens, clone IMAGE:5259272, mRNA || Hs.184430 || N59808 || || || 226482	1.58004	1.47707
|| Homo sapiens, clone IMAGE:5284125, mRNA || Hs.26409 || AI338473 || || || 317917	1.48462	1.07143
|| Homo sapiens, clone IMAGE:5302158, mRNA || Hs.22247 || AA455087 || || || 105221	1.22994	1.87613
|| Homo sapiens, clone IMAGE:5575764, mRNA || Hs.550477 || N48070 || || || 101824	1.45062	1.07143
|| Homo sapiens, clone IMAGE:5583725, mRNA || Hs.103070 || AA284275 || || || 110976	1.4145	1.47707
|| Homo sapiens, clone IMAGE:5583725, mRNA || Hs.103070 || AI075688 || || || 318835	1.42731	0.793728
|| Homo sapiens, Similar to AD038, clone IMAGE:3838464, mRNA || Hs.498939 || AI300542 || || || 312927	1.69821	0.131852
|| HSPC324 || Hs.191591 || R69602 || || || 310672	1.38383	1.87613
|| Hypothetical gene supported by AF147354 || Hs.349092 || AA873152 || || 388789 || 109219	1.36293	1.87613
|| Hypothetical gene supported by AK090593 || Hs.529566 || AI095492 || || 442498 || 315048	1.88811	0
|| Hypothetical gene supported by AK098833 || Hs.517502 || AA879119 || || 440823 || 220165	1.31927	1.62173
|| Hypothetical gene supported by AK124295 || Hs.440258 || AA534305 || || 389641 || 99199	1.78647	0.131852
|| Hypothetical gene supported by AK124295 || Hs.440258 || AA563589 || || 389641 || 98517	2.17429	0
|| Hypothetical gene supported by AK126414 || Hs.468280 || AA453517 || || 388942 || 101418	1.38439	1.68793
|| Hypothetical gene supported by BC042734 || Hs.434230 || AA620821 || || 440384 || 117839	2.24839	0
|| Hypothetical gene supported by BX648586 || Hs.147194 || AI015940 || || 401287 || 307676	1.28673	1.87613
|| Hypothetical LOC283157 || Hs.224422 || AA644123 || || 283157 || 108688	2.36073	0
|| Hypothetical LOC387904 || Hs.549325 || AI206458 || || 387904 || 313313	1.36728	0.542583
|| Hypothetical LOC387943 || Hs.525926 || AA926858 || || 387943 || 315547	1.43946	1.32401
|| Hypothetical LOC388002 || Hs.116304 || AA629110 || || 388002 || 225809	1.43568	0.425188
|| Hypothetical LOC388790 || Hs.293550 || AA195038 || || 388790 || 309791	1.43295	0.94976
|| Hypothetical LOC388890 || Hs.96704 || AI025975 || || 388890 || 309983	1.59627	0.326679
|| Hypothetical LOC389071 || Hs.516721 || AA115071 || || 389071 || 111409	1.5985	0.244054
|| Hypothetical LOC389100 || Hs.99391 || R06980 || || 389100 || 307894	1.38907	1.07143
|| Hypothetical LOC389440 || Hs.32804 || W37337 || || 389440 || 111536	2.23421	0
|| Hypothetical LOC389650 || Hs.60288 || AA625966 || || 389650 || 225358	1.39257	1.68793
|| Hypothetical LOC389656 || Hs.222064 || AA883521 || || 389656 || 315449	1.44291	0.542583
|| Hypothetical LOC392790 || Hs.105944 || AA570178 || || 392790 || 120242	1.56535	0.247501
|| Hypothetical LOC399933 || Hs.503429 || W19228 || || 399933 || 120516	1.47315	0.94976
|| Hypothetical LOC400030 || Hs.380659 || AA421446 || || 400030 || 116582	1.58852	0.244054
|| Hypothetical LOC400201 || Hs.546613 || AA612992 || || 400201 || 106796	2.45773	0
|| Hypothetical LOC400781 || Hs.125298 || AA878703 || || 400781 || 109722	1.48376	0.364305
|| Hypothetical LOC401058 || Hs.125904 || AI003894 || || 401058 || 308212	1.36089	1.47707
|| Hypothetical LOC401884 || Hs.147362 || AA534579 || || 401884 || 118859	1.87514	0.131852
|| Hypothetical LOC402564 || Hs.210944 || AI300832 || || 402564 || 312816	1.84691	0.131852
|| Immunoglobulin heavy chain || Hs.533963 || AI654630 || || || 317463	1.50124	0.185724
|| LOC439993 || Hs.36190 || N59075 || || 439993 || 111714	1.36999	1.87613
|| LOC440309 || Hs.459403 || AA449623 || || 440309 || 105025	1.59949	1.16101
|| LOC440334 || Hs.371397 || AI338518 || || 440334 || 313669	1.5429	0.425188
|| LOC440669 || Hs.515635 || AA503815 || || 440669 || 102230	1.98702	0.131852
|| LOC440767 || Hs.235484 || AI279721 || || 440767 || 319227	2.26373	0.185724
|| LOC440803 || Hs.396963 || AA922551 || || 440803 || 312106	1.52777	1.16101
|| LOC440856 || Hs.145555 || AI261870 || || 440856 || 104385	1.45251	0.793728
|| LOC441097 || Hs.244768 || AA873338 || || 441097 || 107613	1.37761	1.07143
|| LOC441119 || Hs.484309 || AA934493 || || 441119 || 113101	1.43026	1.16101
|| LOC442119 || Hs.549423 || AA707523 || || 442119 || 220933	1.35614	1.87613
|| LOC442521 || Hs.401375 || AA608684 || || 442521 || 111360	1.80328	0.131852
|| LQK1 hypothetical protein short isoform (LQK1) mRNA, complete cds, alternatively spliced || Hs.552649 || AA010221 || || || 103387	1.36264	1.62173
|| Marker A mRNA, partial sequence || Hs.149004 || AA609657 || || || 108753	1.76757	0.185724
|| Monoclonal antibody CA4 Ig heavy chain variable region || Hs.525874 || AA740786 || || || 102577	2.48006	0
|| MRNA of muscle specific gene M1. || Hs.58049 || W69743 || || || 223985	1.36873	0.704799
|| MRNA; cDNA DKFZp434I212 (from clone DKFZp434I212) || Hs.549537 || AI674943 || || || 331348	1.42824	1.16101
|| MRNA; cDNA DKFZp451D1716 (from clone DKFZp451D1716) || Hs.22005 || AA622232 || || || 113526	1.40799	1.62173
|| MRNA; cDNA DKFZp566N0924 (from clone DKFZp566N0924) || Hs.519506 || AA487179 || || || 113282	1.41854	1.16101
|| MRNA; cDNA DKFZp686D22106 (from clone DKFZp686D22106) || Hs.445036 || N33342 || || || 220191	1.34569	1.16101
|| MRNA; cDNA DKFZp686G17118 (from clone DKFZp686G17118) || Hs.439334 || AA634108 || || || 225834	1.68075	0
|| MRNA; cDNA DKFZp686J17110 (from clone DKFZp686J17110) || Hs.59773 || AA054443 || || || 106698	1.32452	1.07143
|| MRNA; cDNA DKFZp686K07244 (from clone DKFZp686K07244) || Hs.444495 || R31402 || || || 106745	1.56724	0.364305
|| MRNA; cDNA DKFZp761I1311 (from clone DKFZp761I1311) || Hs.529392 || AA709271 || || || 103391	1.42771	0.542583
|| PREDICTED: Homo sapiens hypothetical gene supported by AK094370 (LOC441208), mRNA || Hs.529584 || AA609057 || || || 112071	1.38279	1.16101
|| PRO1310 || Hs.478267 || W72227 || || || 107057	1.93194	0
|| Similar to 40S ribosomal protein S10 || Hs.433461 || R09218 || || 158104 || 98881	1.45497	1.07143
|| Similar to AI661453 protein || Hs.444277 || AI002038 || || 389389 || 104965	1.41411	1.47707
|| Similar to BTG3 associated nuclear protein isoform b; BANP homolog; SMAR1 homolog || Hs.460515 || AA937728 || || 440352 || 110351	1.39025	0.704799
|| Similar to carbonic anhydrase VA, mitochondrial precursor; carbonic anhydrase V, mitochondrial; carbonic dehydratase || Hs.546649 || AA699469 || || 440355 || 114772	1.57596	0.803811
|| Similar to CXXC finger 6; leukemia-associated protein with a CXXC domain; ten-eleven translocation-1 || Hs.444185 || AI338607 || || 442020 || 319544	1.28969	1.87613
|| Similar to GTP-binding protein SAR1a (COPII-associated small GTPase) || Hs.28312 || R64580 || || 344988 || 104739	1.33877	1.68793
|| Similar to KIAA0752 protein || Hs.368516 || AA707531 || || 389347 || 223076	1.60172	0.704799
|| Similar to LPIN3 || Hs.528618 || AI208765 || || 391248 || 319357	1.5027	0.185724
|| Similar to matrilin 2 precursor || Hs.491104 || AA947456 || || 285929 || 311489	1.50327	0.704799
|| Similar to mFLJ00251 protein || Hs.135119 || AA291601 || || 387750 || 111030	2.39435	0
|| Similar to mFLJ00251 protein || Hs.135119 || AA496312 || || 387750 || 106842	2.305	0
|| Similar to mitochondrial C1-tetrahydrofolate synthase || Hs.404758 || AA609608 || || 389752 || 105184	1.56025	1.62173
|| Similar to Polyadenylate-binding protein 4 (Poly(A)-binding protein 4) (PABP 4) (Inducible poly(A)-binding protein) (iPABP) (Activated-platelet protein-1) (APP-1) || Hs.49889 || AI822078 || || 132430 || 107108	1.41002	1.32401
|| Similar to protein of fungal metazoan origin like (11.1 kD) (2C514) || Hs.466662 || N26621 || || 440574 || 225273	1.91473	0.131852
|| Similar to putative haemopoietic membrane protein || Hs.443469 || AA460254 || || 387733 || 107695	1.43448	0.451626
|| Similar to ribosomal protein L22 || Hs.22571 || R18900 || || 402100 || 109978	2.03136	0.0990004
|| Similar to RIKEN cDNA 0610009J22 || Hs.549272 || AA626379 || || 200312 || 224992	1.66316	0.0990004
|| Similar to RPE-spondin || Hs.356766 || AA625574 || || 441951 || 221314	1.48962	1.68793
|| Similar to Zinc finger protein 254 (Bone marrow zinc finger 5) (BMZF-5) (Hematopoietic cell derived zinc finger protein 1) (HD-ZNF1) || Hs.550575 || AA884735 || || 390913 || 224879	1.42147	2.01742
|| Similar to Zinc finger protein 264 || Hs.22488 || AA954234 || || 390980 || 315329	1.31595	1.32401
|| Similar to Zinc finger protein Rlf (Rearranged L-myc fusion gene protein) (Zn-15 related protein) || Hs.167614 || AA173525 || || 440971 || 103328	1.30014	1.32401
|| Transcribed locus || Hs.100938 || R24253 || || || 105378	1.56308	0.425188
|| Transcribed locus || Hs.104801 || AA417560 || || || 222430	1.61125	0.185724
|| Transcribed locus || Hs.104881 || AA430570 || || || 102595	2.14445	0
|| Transcribed locus || Hs.105423 || AA502641 || || || 103327	1.87029	0.244054
|| Transcribed locus || Hs.105473 || AA515997 || || || 101800	1.39785	0.364305
|| Transcribed locus || Hs.105551 || AA523428 || || || 104307	2.0229	0.131852
|| Transcribed locus || Hs.105735 || AA504626 || Unknown UG Hs.105735 ESTs sc_id3048 || || 185589	1.59159	0.247501
|| Transcribed locus || Hs.105821 || AA532765 || || || 109071	1.89542	0
|| Transcribed locus || Hs.105830 || AA534565 || || || 105976	1.72115	0.185724
|| Transcribed locus || Hs.112582 || AA523051 || || || 115365	1.71484	0.247501
|| Transcribed locus || Hs.112582 || AA879017 || || || 107761	1.81927	0.185724
|| Transcribed locus || Hs.112623 || AA608977 || || || 118171	1.46677	1.62173
|| Transcribed locus || Hs.112679 || AA609289 || || || 98452	1.72291	0.247501
|| Transcribed locus || Hs.112689 || AA609323 || || || 118122	1.52091	0.542583
|| Transcribed locus || Hs.112731 || AA609605 || || || 120191	1.42785	0.704799
|| Transcribed locus || Hs.112789 || AA609935 || || || 110763	1.43834	0.451626
|| Transcribed locus || Hs.112851 || AA620287 || || || 102845	1.54937	1.16101
|| Transcribed locus || Hs.112970 || AA621313 || || || 106326	1.40129	1.32401
|| Transcribed locus || Hs.116066 || AA625671 || || || 227063	1.35238	1.87613
|| Transcribed locus || Hs.116075 || AA625764 || || || 225308	1.39396	1.32401
|| Transcribed locus || Hs.116141 || AA626256 || || || 221377	1.65512	0.131852
|| Transcribed locus || Hs.116142 || N50783 || || || 307166	1.43475	0.793728
|| Transcribed locus || Hs.116296 || AA629040 || || || 224353	1.59472	0.185724
|| Transcribed locus || Hs.116507 || AA652323 || || || 112320	1.31146	1.68793
|| Transcribed locus || Hs.116530 || AA653524 || || || 107841	1.59237	0.364305
|| Transcribed locus || Hs.116864 || AA884261 || || || 224040	1.32738	2.01742
|| Transcribed locus || Hs.117115 || AA678267 || || || 223849	1.70595	0.247501
|| Transcribed locus || Hs.117249 || AA718934 || || || 220592	1.51049	1.62173
|| Transcribed locus || Hs.119225 || AA420966 || || || 222137	1.36325	0.793728
|| Transcribed locus || Hs.119921 || AA705808 || || || 223380	1.30763	1.47707
|| Transcribed locus || Hs.120299 || AA707617 || || || 226118	1.37343	2.01742
|| Transcribed locus || Hs.120863 || AA706664 || || || 224083	1.52866	0.94976
|| Transcribed locus || Hs.123106 || AA857991 || || || 226530	1.5488	0.185724
|| Transcribed locus || Hs.123153 || AA687914 || || || 98531	1.28786	1.47707
|| Transcribed locus || Hs.123543 || AI005270 || || || 308193	1.34754	1.07143
|| Transcribed locus || Hs.124173 || AI052137 || || || 316500	1.4739	0.803811
|| Transcribed locus || Hs.124327 || AA953470 || || || 307922	1.60232	0.367894
|| Transcribed locus || Hs.124547 || AI079672 || || || 311692	1.6386	0.185724
|| Transcribed locus || Hs.125407 || AA878944 || || || 106549	1.41905	1.32401
|| Transcribed locus || Hs.125439 || AI015833 || || || 307832	1.53258	0.542583
|| Transcribed locus || Hs.125533 || AA911200 || || || 315689	1.59568	0
|| Transcribed locus || Hs.125626 || AI286183 || || || 314866	1.35052	1.87613
|| Transcribed locus || Hs.126101 || AA973297 || || || 308848	1.87064	0
|| Transcribed locus || Hs.127144 || AA937603 || || || 111071	1.63158	0.451626
|| Transcribed locus || Hs.127344 || AA954687 || || || 102121	1.61288	0.131852
|| Transcribed locus || Hs.128011 || AA993600 || || || 319000	1.40492	1.32401
|| Transcribed locus || Hs.128128 || AA906934 || || || 100394	1.44576	1.07143
|| Transcribed locus || Hs.128128 || AA971610 || || || 117582	1.40236	0.704799
|| Transcribed locus || Hs.128325 || AA973750 || || || 315238	1.50093	0.704799
|| Transcribed locus || Hs.128470 || AA976138 || || || 100956	1.40802	1.32401
|| Transcribed locus || Hs.128903 || AA834452 || || || 113669	1.48574	0.704799
|| Transcribed locus || Hs.129235 || AA991437 || || || 318572	1.31348	2.01742
|| Transcribed locus || Hs.129613 || AA999790 || || || 100908	1.6267	0.131852
|| Transcribed locus || Hs.129796 || AA994958 || || || 310324	1.74408	0.185724
|| Transcribed locus || Hs.130009 || AA886702 || || || 114194	1.36762	1.32401
|| Transcribed locus || Hs.130027 || AA897630 || || || 310302	1.33214	1.62173
|| Transcribed locus || Hs.130176 || AA907360 || || || 309017	1.47731	0.451626
|| Transcribed locus || Hs.130180 || AA908170 || || || 100867	1.69883	0
|| Transcribed locus || Hs.130213 || AA910814 || || || 116358	1.32878	1.62173
|| Transcribed locus || Hs.130585 || AI004765 || || || 310993	1.34665	1.07143
|| Transcribed locus || Hs.130639 || AI005310 || || || 306934	1.47118	0.364305
|| Transcribed locus || Hs.131179 || AI017577 || || || 308008	1.43732	0.364305
|| Transcribed locus || Hs.131242 || AI018780 || || || 309420	1.46071	1.68793
|| Transcribed locus || Hs.132141 || AI041717 || || || 317051	1.32187	1.32401
|| Transcribed locus || Hs.133024 || AI049730 || || || 106626	1.70021	0
|| Transcribed locus || Hs.134662 || AI262375 || || || 106909	1.34738	1.47707
|| Transcribed locus || Hs.134687 || AI088327 || || || 318964	1.54811	0.326679
|| Transcribed locus || Hs.135082 || AI097258 || || || 317939	1.77162	0
|| Transcribed locus || Hs.135108 || AI096353 || || || 315627	2.09234	0
|| Transcribed locus || Hs.135421 || AI073507 || || || 317632	1.39667	1.16101
|| Transcribed locus || Hs.135492 || AI090477 || || || 317289	1.54486	0.247501
|| Transcribed locus || Hs.135536 || AI096468 || || || 319724	1.35	1.16101
|| Transcribed locus || Hs.135851 || AA921942 || || || 316004	1.40671	0.244054
|| Transcribed locus || Hs.135853 || AA922734 || || || 314848	1.31695	1.16101
|| Transcribed locus || Hs.136401 || AA527182 || || || 102034	2.39399	0
|| Transcribed locus || Hs.136418 || AA548781 || || || 113029	3.05711	0
|| Transcribed locus || Hs.136472 || AA581464 || || || 111532	1.32761	2.01742
|| Transcribed locus || Hs.136495 || AA587807 || || || 106323	2.2057	0.185724
|| Transcribed locus || Hs.136788 || AA775059 || || || 114378	2.16674	0
|| Transcribed locus || Hs.136791 || AA776380 || || || 107051	1.82467	0.131852
|| Transcribed locus || Hs.137398 || AA164566 || || || 106750	1.75225	0
|| Transcribed locus || Hs.139649 || AA504810 || Unknown UG Hs.139649 EST || || 185628	1.3506	1.32401
|| Transcribed locus || Hs.143434 || H19023 || || || 116414	1.49505	0.367894
|| Transcribed locus || Hs.143495 || AI147112 || || || 315159	2.00108	0
|| Transcribed locus || Hs.143587 || AA935523 || || || 315414	1.43918	1.07143
|| Transcribed locus || Hs.144651 || R00271 || || || 308141	1.3464	0.793728
|| Transcribed locus || Hs.144651 || R02329 || || || 110236	1.29481	1.16101
|| Transcribed locus || Hs.145394 || AI253164 || || || 103077	1.44036	0.704799
|| Transcribed locus || Hs.145686 || AI266439 || || || 314378	1.67751	0.244054
|| Transcribed locus || Hs.145933 || AI275419 || || || 312349	1.62824	0.364305
|| Transcribed locus || Hs.145940 || AI276124 || || || 312788	1.58694	0.185724
|| Transcribed locus || Hs.145993 || AI277784 || || || 313105	1.59339	0.451626
|| Transcribed locus || Hs.146933 || AI168102 || || || 319591	1.97577	0.185724
|| Transcribed locus || Hs.146949 || AI168608 || || || 315008	1.51943	0.326679
|| Transcribed locus || Hs.147030 || AI186173 || || || 320061	1.44782	0.803811
|| Transcribed locus || Hs.147381 || AA884256 || || || 221284	1.33884	1.16101
|| Transcribed locus || Hs.147948 || AI083918 || || || 318132	1.77008	0
|| Transcribed locus || Hs.148649 || AI203259 || || || 313525	1.69377	0
|| Transcribed locus || Hs.149089 || AA130408 || || || 100068	2.12559	0
|| Transcribed locus || Hs.149995 || AI052026 || || || 312483	1.49401	0.542583
|| Transcribed locus || Hs.150001 || AI291563 || || || 312586	1.46161	0.704799
|| Transcribed locus || Hs.150399 || AA911032 || || || 317493	1.45944	0.542583
|| Transcribed locus || Hs.150743 || AI123352 || || || 319754	1.60972	0.247501
|| Transcribed locus || Hs.150808 || AI302464 || || || 319949	1.3561	1.62173
|| Transcribed locus || Hs.151285 || AI301355 || || || 312591	1.36499	1.62173
|| Transcribed locus || Hs.151334 || AI306471 || || || 317760	1.5881	0.185724
|| Transcribed locus || Hs.152812 || AI123717 || || || 313493	1.41103	0.793728
|| Transcribed locus || Hs.156393 || AI339219 || || || 317527	1.82088	0.185724
|| Transcribed locus || Hs.156420 || AI339882 || || || 319920	1.45837	1.87613
|| Transcribed locus || Hs.156981 || AA885209 || || || 221172	1.27338	1.87613
|| Transcribed locus || Hs.156984 || AA885221 || || || 223331	1.36858	1.16101
|| Transcribed locus || Hs.158667 || AI371390 || || || 317979	1.29322	1.68793
|| Transcribed locus || Hs.163813 || R25152 || || || 115704	1.85167	0.185724
|| Transcribed locus || Hs.164964 || AI025239 || || || 308834	1.39224	1.07143
|| Transcribed locus || Hs.16633 || AA679279 || || || 225571	1.41869	0.793728
|| Transcribed locus || Hs.168132 || AA973334 || || || 313660	1.82404	0
|| Transcribed locus || Hs.181085 || AA989075 || || || 108309	1.87493	0.185724
|| Transcribed locus || Hs.181895 || AA429399 || || || 101010	1.37531	0.94976
|| Transcribed locus || Hs.18826 || R10452 || || || 110527	1.32835	2.01742
|| Transcribed locus || Hs.191602 || AA420602 || || || 105345	1.53078	0.425188
|| Transcribed locus || Hs.196244 || AA669600 || || || 225058	1.4078	1.47707
|| Transcribed locus || Hs.201858 || AA884826 || || || 221939	1.35749	1.32401
|| Transcribed locus || Hs.215801 || AA995971 || || || 99873	1.43635	1.07143
|| Transcribed locus || Hs.220488 || AA905438 || || || 310408	1.31708	1.16101
|| Transcribed locus || Hs.24276 || R28190 || || || 98532	1.67925	1.16101
|| Transcribed locus || Hs.249975 || AI147705 || || || 314930	1.72133	0.131852
|| Transcribed locus || Hs.25577 || AI732310 || || || 106960	1.24633	1.87613
|| Transcribed locus || Hs.261314 || AA114939 || || || 119207	2.05709	0.131852
|| Transcribed locus || Hs.262789 || AI022933 || || || 310070	1.42776	0.793728
|| Transcribed locus || Hs.270552 || AI015709 || || || 108404	1.46327	0.367894
|| Transcribed locus || Hs.299119 || AI732317 || || || 119968	1.48605	0.451626
|| Transcribed locus || Hs.303719 || AA776771 || || || 225198	1.5848	0.185724
|| Transcribed locus || Hs.304474 || AA746053 || || || 116044	1.85269	0
|| Transcribed locus || Hs.317713 || AI026048 || || || 310239	1.58205	0.803811
|| Transcribed locus || Hs.325070 || AA620977 || || || 315365	1.44419	0.94976
|| Transcribed locus || Hs.326357 || AA884618 || || || 320002	1.86672	0.451626
|| Transcribed locus || Hs.332843 || AA608907 || || || 108362	1.4748	1.68793
|| Transcribed locus || Hs.332916 || H59625 || || || 101062	1.42382	1.68793
|| Transcribed locus || Hs.338322 || AI147724 || || || 319109	1.45966	0.425188
|| Transcribed locus || Hs.343713 || AI261369 || || || 109565	1.82689	0.131852
|| Transcribed locus || Hs.343713 || AI261380 || || || 102062	1.93655	0.247501
|| Transcribed locus || Hs.355689 || AA424568 || || || 119611	1.57088	0.364305
|| Transcribed locus || Hs.358953 || N56948 || || || 225753	1.91926	0.185724
|| Transcribed locus || Hs.368206 || AA400154 || || || 101972	1.47703	1.32401
|| Transcribed locus || Hs.368804 || AI346770 || || || 315786	1.33624	1.32401
|| Transcribed locus || Hs.377419 || AA532810 || || || 116330	1.69915	0.704799
|| Transcribed locus || Hs.377508 || AA224785 || || || 106841	1.39701	1.62173
|| Transcribed locus || Hs.381048 || H77855 || || || 105430	1.48328	0.704799
|| Transcribed locus || Hs.399958 || AA992107 || || || 310045	1.45014	0.803811
|| Transcribed locus || Hs.405849 || AA629282 || || || 222002	1.47914	1.47707
|| Transcribed locus || Hs.406371 || N33195 || || || 223673	1.38209	0.451626
|| Transcribed locus || Hs.42192 || H97496 || || || 107586	1.67238	0.185724
|| Transcribed locus || Hs.434903 || AA985582 || || || 103844	1.6763	0.131852
|| Transcribed locus || Hs.435804 || AI271427 || || || 317076	1.53509	0.185724
|| Transcribed locus || Hs.437918 || R76247 || || || 116488	1.59746	0.364305
|| Transcribed locus || Hs.438441 || AA609314 || || || 110867	1.63053	1.16101
|| Transcribed locus || Hs.439558 || R00964 || || || 307789	1.52854	0.185724
|| Transcribed locus || Hs.442306 || AA004811 || || || 103332	1.33722	1.32401
|| Transcribed locus || Hs.443564 || AA504462 || Unknown UG Hs.105730 ESTs || || 185456	1.33944	1.07143
|| Transcribed locus || Hs.443742 || AA631814 || || || 100970	1.5053	0.704799
|| Transcribed locus || Hs.443819 || AA683338 || || || 224108	1.40552	0.367894
|| Transcribed locus || Hs.444493 || AI273403 || || || 318610	1.3828	1.07143
|| Transcribed locus || Hs.445499 || AA976215 || || || 104206	1.83428	0.185724
|| Transcribed locus || Hs.445843 || T99071 || || || 110066	1.49689	0.793728
|| Transcribed locus || Hs.445915 || AA488859 || Unknown UG Hs.139535 ESTs sc_id2721 || || 185457	1.46856	1.16101
|| Transcribed locus || Hs.446169 || AA904797 || || || 224520	1.39002	2.01742
|| Transcribed locus || Hs.494822 || AI264462 || || || 317824	1.52786	0.542583
|| Transcribed locus || Hs.511042 || AA621037 || || || 112539	1.3915	0.94976
|| Transcribed locus || Hs.515804 || AA400235 || || || 101036	1.4471	0.704799
|| Transcribed locus || Hs.518637 || AA620828 || || || 108442	1.48827	1.07143
|| Transcribed locus || Hs.523316 || AA757455 || || || 221068	1.55762	1.32401
|| Transcribed locus || Hs.523969 || AA609474 || || || 115535	2.69159	0
|| Transcribed locus || Hs.526719 || AI263595 || || || 306984	1.51094	1.07143
|| Transcribed locus || Hs.527314 || N27303 || || || 107358	1.42409	0.704799
|| Transcribed locus || Hs.530399 || AI261402 || || || 317627	1.39933	1.87613
|| Transcribed locus || Hs.531274 || AA626942 || || || 220458	1.37586	0.451626
|| Transcribed locus || Hs.534067 || AI279449 || || || 313639	1.39628	0.803811
|| Transcribed locus || Hs.535266 || AI123752 || || || 313698	1.50796	0.803811
|| Transcribed locus || Hs.535913 || AA426068 || || || 116307	1.32797	1.68793
|| Transcribed locus || Hs.536038 || AA953994 || || || 310364	1.35336	1.32401
|| Transcribed locus || Hs.536290 || AA625844 || || || 221030	1.50772	0.367894
|| Transcribed locus || Hs.536529 || AI283016 || || || 313186	1.42291	0.793728
|| Transcribed locus || Hs.536859 || AA973963 || || || 113281	1.57216	0.364305
|| Transcribed locus || Hs.537174 || AI051857 || || || 312368	1.5589	0.185724
|| Transcribed locus || Hs.537394 || AI309045 || || || 311765	1.32083	1.47707
|| Transcribed locus || Hs.537695 || AA598548 || || || 119134	1.35973	1.07143
|| Transcribed locus || Hs.537766 || T97314 || || || 118409	1.30436	1.87613
|| Transcribed locus || Hs.537776 || AI349532 || || || 314945	1.66055	0.131852
|| Transcribed locus || Hs.537861 || AA135932 || || || 224594	1.28217	1.68793
|| Transcribed locus || Hs.538411 || AI024592 || || || 307207	1.96116	0.131852
|| Transcribed locus || Hs.538467 || AI263561 || || || 313473	1.33236	1.07143
|| Transcribed locus || Hs.538869 || AA534286 || || || 101331	1.54228	0.185724
|| Transcribed locus || Hs.539085 || AA989351 || || || 105924	1.41179	1.07143
|| Transcribed locus || Hs.539330 || AA682779 || || || 226585	1.69292	0.247501
|| Transcribed locus || Hs.539367 || AI371376 || || || 311657	1.37422	2.01742
|| Transcribed locus || Hs.539586 || AA581248 || || || 116659	1.8016	0.185724
|| Transcribed locus || Hs.539639 || AI087882 || || || 312420	1.41652	0.803811
|| Transcribed locus || Hs.539840 || AI051664 || || || 161259	1.61841	0.0990004
|| Transcribed locus || Hs.540529 || AA548242 || || || 104541	1.88595	0.131852
|| Transcribed locus || Hs.541326 || AA992015 || || || 317297	1.53393	1.62173
|| Transcribed locus || Hs.541596 || AA620741 || || || 113741	1.33623	1.87613
|| Transcribed locus || Hs.541943 || AA630519 || || || 100538	1.41208	1.16101
|| Transcribed locus || Hs.542090 || AA233416 || || || 306873	1.34341	1.32401
|| Transcribed locus || Hs.542440 || AI214695 || || || 316900	1.34646	1.47707
|| Transcribed locus || Hs.543119 || AI092576 || || || 319564	1.6159	1.16101
|| Transcribed locus || Hs.543249 || AA448158 || || || 106253	1.3839	1.62173
|| Transcribed locus || Hs.543811 || AI205811 || || || 316941	1.56289	0.247501
|| Transcribed locus || Hs.543844 || AA884386 || || || 220464	1.38494	0.803811
|| Transcribed locus || Hs.543886 || AA448271 || || || 109539	1.61703	0.542583
|| Transcribed locus || Hs.545352 || AA480325 || || || 108081	2.6259	0.131852
|| Transcribed locus || Hs.545392 || AA678525 || || || 115543	1.52711	0.94976
|| Transcribed locus || Hs.545602 || N90609 || || || 103553	1.39658	0.451626
|| Transcribed locus || Hs.545742 || AA609295 || || || 118607	1.71804	0.803811
|| Transcribed locus || Hs.545887 || AA775035 || || || 116513	1.54686	0.94976
|| Transcribed locus || Hs.546112 || AI277621 || || || 311075	1.3724	0.793728
|| Transcribed locus || Hs.546811 || AA609955 || || || 103025	1.30022	2.01742
|| Transcribed locus || Hs.546936 || AA620973 || || || 113096	1.48964	0.425188
|| Transcribed locus || Hs.547288 || R07483 || || || 100748	1.36992	1.62173
|| Transcribed locus || Hs.54802 || N92526 || || || 119282	1.56552	0.247501
|| Transcribed locus || Hs.548860 || AA902764 || || || 308743	1.44778	0.704799
|| Transcribed locus || Hs.549485 || AA292856 || || || 111225	1.28125	1.47707
|| Transcribed locus || Hs.549823 || AA134494 || || || 116818	1.39556	1.32401
|| Transcribed locus || Hs.550005 || N93807 || || || 110370	1.66956	0.185724
|| Transcribed locus || Hs.550709 || AA946764 || || || 115810	1.34441	0.704799
|| Transcribed locus || Hs.551125 || AI339477 || || || 314050	1.71044	0.185724
|| Transcribed locus || Hs.551832 || AA569957 || || || 104968	1.53531	0.451626
|| Transcribed locus || Hs.55185 || AI668706 || || || 107202	1.7219	0.244054
|| Transcribed locus || Hs.552082 || W37371 || || || 117282	1.47166	1.07143
|| Transcribed locus || Hs.552970 || R01899 || || || 110331	1.35521	0.704799
|| Transcribed locus || Hs.553068 || AA916511 || || || 110831	1.34131	1.32401
|| Transcribed locus || Hs.553083 || W95947 || || || 98769	1.45047	0.364305
|| Transcribed locus || Hs.553244 || W31389 || || || 119266	1.71847	0.131852
|| Transcribed locus || Hs.66290 || AA579567 || || || 102277	2.22506	0
|| Transcribed locus || Hs.71999 || AA876080 || || || 111621	2.05946	0
|| Transcribed locus || Hs.7413 || AA975538 || || || 314597	1.28271	1.87613
|| Transcribed locus || Hs.88651 || AA443594 || || || 100055	1.34559	1.16101
|| Transcribed locus || Hs.91384 || R16655 || || || 98998	1.43581	2.01742
|| Transcribed locus || Hs.97408 || AA437090 || || || 225431	1.46106	0.542583
|| Transcribed locus || Hs.97584 || AA398193 || || || 108343	1.41523	1.68793
|| Transcribed locus || Hs.97631 || AA398235 || || || 99762	1.46365	0.131852
|| Transcribed locus || Hs.98007 || AA406083 || || || 102881	1.3779	1.16101
|| Transcribed locus || Hs.98163 || AA416889 || || || 113136	1.35442	1.32401
|| Transcribed locus || Hs.99394 || AA455130 || || || 105523	1.37093	0.425188
|| Transcribed locus, moderately similar to NP_004650.1 matrix metalloproteinase 23A [Homo sapiens] || Hs.536740 || AI334253 || || || 318583	1.77578	0
|| Transcribed locus, moderately similar to NP_055301.1 neuronal thread protein AD7c-NTP [Homo sapiens] || Hs.524270 || N89814 || || || 113052	2.07557	0
|| Transcribed locus, moderately similar to NP_055301.1 neuronal thread protein AD7c-NTP [Homo sapiens] || Hs.549681 || AI289160 || || || 319710	1.57392	0.185724
|| Transcribed locus, moderately similar to NP_057053.1 mitochondrial ribosomal protein S17 [Homo sapiens] || Hs.541023 || AA733080 || || || 220511	1.29669	2.01742
|| Transcribed locus, moderately similar to NP_659411.1 hypothetical protein FLJ31846 [Homo sapiens] || Hs.551055 || N90470 || || || 116432	1.93093	0
|| Transcribed locus, moderately similar to NP_689672.2 hypothetical protein MGC45438 [Homo sapiens] || Hs.547698 || AI291184 || || || 313671	1.53692	0.803811
|| Transcribed locus, moderately similar to NP_710156.2 hypothetical protein FLJ38973 [Homo sapiens] || Hs.132426 || AI298798 || || || 315865	1.3173	1.47707
|| Transcribed locus, moderately similar to NP_775622.1 expressed sequence AW121567 [Mus musculus] || Hs.535394 || R15891 || || || 103885	1.35993	1.62173
|| Transcribed locus, moderately similar to NP_997349.1 Homo sapiens FLJ46489 gene || Hs.105416 || AA502275 || || || 119166	2.38599	0
|| Transcribed locus, moderately similar to XP_209041.2 KIAA1503 protein [Homo sapiens] || Hs.21364 || N62279 || || || 226431	1.37	0.803811
|| Transcribed locus, moderately similar to XP_209041.2 KIAA1503 protein [Homo sapiens] || Hs.414071 || AA669549 || || || 116463	1.70795	0.131852
|| Transcribed locus, moderately similar to XP_375042.2 DKFZP434B061 protein [Homo sapiens] || Hs.535667 || AI187214 || || || 313696	1.93065	0.185724
|| Transcribed locus, moderately similar to XP_499060.1 LOC441203 [Homo sapiens] || Hs.105081 || AA468683 || || || 99833	1.58944	0.364305
|| Transcribed locus, moderately similar to XP_499060.1 LOC441203 [Homo sapiens] || Hs.105081 || AI262333 || || || 112119	1.50858	0.367894
|| Transcribed locus, moderately similar to XP_508595.1 similar to Protein tyrosine phosphatase receptor type C-associated protein (PTPRC-associated protein) (CD45-associated protein) (CD45-AP) (Lymphocy || Hs.553131 || AI991606 || || || 330964	2.07037	0
|| Transcribed locus, moderately similar to XP_510104.1 similar to hypothetical protein FLJ25224 [Pan troglodytes] || Hs.437039 || AA454543 || || || 109852	1.52071	0.704799
|| Transcribed locus, moderately similar to XP_512541.1 similar to hypothetical protein [Pan troglodytes] || Hs.47068 || N52874 || || || 103318	1.44092	0.793728
|| Transcribed locus, moderately similar to XP_512541.1 similar to hypothetical protein [Pan troglodytes] || Hs.55452 || W31465 || || || 104976	1.28076	1.62173
|| Transcribed locus, moderately similar to XP_514848.1 a disintegrin and metalloprotease with thrombospondin motifs-5 [Pan troglodytes] || Hs.100839 || R13341 || || || 114212	1.52432	0.326679
|| Transcribed locus, moderately similar to XP_515456.1 LOC459212 [Pan troglodytes] || Hs.515975 || AA609282 || || || 113464	2.20578	0
|| Transcribed locus, moderately similar to XP_517655.1 similar to KIAA0825 protein [Pan troglodytes] || Hs.514833 || AI291970 || || || 312096	1.38442	0.451626
|| Transcribed locus, moderately similar to XP_517655.1 similar to KIAA0825 protein [Pan troglodytes] || Hs.547514 || AI298671 || || || 311763	1.56607	0.244054
|| Transcribed locus, moderately similar to XP_517948.1 similar to titin immunoglobulin domain protein; myotilin [Pan troglodytes] || Hs.508917 || AI822069 || || || 117820	1.31905	1.47707
|| Transcribed locus, moderately similar to XP_518970.1 similar to GLCCI1 protein [Pan troglodytes] || Hs.552810 || AA251825 || || || 223487	1.27721	1.87613
|| Transcribed locus, moderately similar to XP_520664.1 similar to tetratricopeptide repeat domain 5 [Pan troglodytes] || Hs.365809 || AA412446 || || || 109042	1.39709	0.803811
|| Transcribed locus, moderately similar to XP_526826.1 similar to iroquois homeobox protein 2 [Pan troglodytes] || Hs.149648 || AI261993 || || || 116596	1.31397	1.47707
|| Transcribed locus, moderately similar to XP_530187.1 LOC457314 [Pan troglodytes] || Hs.490253 || AA456642 || || || 108107	1.51693	0.244054
|| Transcribed locus, moderately similar to XP_530499.1 LOC459536 [Pan troglodytes] || Hs.468769 || N70088 || || || 113659	1.96525	0
|| Transcribed locus, moderately similar to XP_531995.1 similar to calicin [Canis familiaris] || Hs.438914 || AA018460 || || || 120572	1.55413	0.131852
|| Transcribed locus, moderately similar to XP_533947.1 similar to GA10727-PA [Canis familiaris] || Hs.536505 || AI202885 || || || 319593	1.37812	1.16101
|| Transcribed locus, strongly similar to NP_060666.1 trimethyllysine hydroxylase, epsilon [Homo sapiens] || Hs.552798 || N49068 || || || 103623	1.51013	0.793728
|| Transcribed locus, strongly similar to NP_067044.1 lymphocyte antigen 6 complex, locus G5B [Homo sapiens] || Hs.512669 || R69566 || || || 98810	2.33937	0
|| Transcribed locus, strongly similar to NP_904329.1 Mus musculus ND2 gene || Hs.526858 || AI057558 || || || 316585	1.57834	0.185724
|| Transcribed locus, strongly similar to XP_209668.2 similar to RIKEN cDNA 1700007I06 [Homo sapiens] || Hs.131570 || AI024830 || || || 308390	1.29439	1.32401
|| Transcribed locus, strongly similar to XP_211174.1 hypothetical LOC283710 [Homo sapiens] || Hs.444573 || AA954372 || || || 309897	1.35488	1.16101
|| Transcribed locus, strongly similar to XP_211174.1 hypothetical LOC283710 [Homo sapiens] || Hs.444573 || AI298812 || || || 317422	1.32321	1.68793
|| Transcribed locus, strongly similar to XP_373845.2 hypothetical LOC388638 [Homo sapiens] || Hs.120204 || AA973879 || || || 312631	1.5403	0.247501
|| Transcribed locus, strongly similar to XP_379643.2 hypothetical gene supported by BC032955 [Homo sapiens] || Hs.493239 || AA628225 || || || 223389	1.32739	1.68793
|| Transcribed locus, strongly similar to XP_496055.1 similar to p40 [Homo sapiens] || Hs.131441 || AI023820 || || || 307805	1.55263	0.425188
|| Transcribed locus, strongly similar to XP_499156.1 LOC441460 [Homo sapiens] || Hs.377120 || AA626249 || || || 222509	2.03937	0
|| Transcribed locus, strongly similar to XP_508853.1 similar to Toll-interleukin 1 receptor domain-containing adaptor protein isoform b; adapter protein wyatt; MyD88 adapter-like protein; TIR domain-con || Hs.478416 || AI187349 || || || 319234	1.79725	0.185724
|| Transcribed locus, strongly similar to XP_508976.1 similar to C10 protein; C10 gene [Pan troglodytes] || Hs.459859 || AI042180 || || || 319398	1.62282	0.326679
|| Transcribed locus, strongly similar to XP_509281.1 similar to SNRPF protein [Pan troglodytes] || Hs.125549 || AA884114 || || || 223913	1.30835	1.62173
|| Transcribed locus, strongly similar to XP_513429.1 similar to 24-dehydrocholesterol reductase; seladin-1; 3 beta-hydroxysterol delta 24 reductase [Pan troglodytes] || Hs.498748 || AA430093 || || || 104371	1.30627	1.68793
|| Transcribed locus, strongly similar to XP_513608.1 similar to family with sequence similarity 10, member A5 [Pan troglodytes] || Hs.98480 || AA425131 || || || 118170	1.50337	0.425188
|| Transcribed locus, strongly similar to XP_515285.1 similar to inhibitor of DNA binding 2; inhibitor of differentiation 2; DNA-binding protein inhibitor ID2; helix-loop-helix protein ID2 [Pan troglodyt || Hs.128064 || AA970710 || || || 308113	1.4592	0.793728
|| Transcribed locus, strongly similar to XP_518411.1 similar to LEM domain containing 2 [Pan troglodytes] || Hs.165387 || AA628214 || || || 223579	1.75387	0.185724
|| Transcribed locus, strongly similar to XP_519419.1 similar to homeodomain interacting protein kinase 2 [Pan troglodytes] || Hs.131706 || W38000 || || || 224342	1.5176	1.47707
|| Transcribed locus, strongly similar to XP_525497.1 similar to minichromosome maintenance protein 3 associated protein; germinal center-associated nuclear protein; MCM3 import protein; minichromosome m || Hs.306764 || AI147284 || || || 318954	1.91822	0.185724
|| Transcribed locus, strongly similar to XP_526859.1 similar to arrestin domain containing 3 [Pan troglodytes] || Hs.116364 || AA620955 || || || 223689	1.31776	0.94976
|| Transcribed locus, strongly similar to XP_528497.1 similar to Paired box protein Pax-5 (B-cell specific transcription factor) (BSAP) [Pan troglodytes] || Hs.493845 || AA286939 || Unknown UG Hs.105096 EST || || 187122	1.43386	0.451626
|| Transcribed locus, strongly similar to XP_528622.1 similar to transcription factor TFII-I-alpha [Pan troglodytes] || Hs.404330 || AA494413 || || || 115825	2.01648	0
|| Transcribed locus, strongly similar to XP_529518.1 LOC452210 [Pan troglodytes] || Hs.127346 || AA954738 || || || 99410	1.68559	0.244054
|| Transcribed locus, strongly similar to XP_529695.1 LOC453551 [Pan troglodytes] || Hs.535432 || AA453519 || || || 111854	1.62425	1.32401
|| Transcribed locus, strongly similar to XP_530393.1 LOC458842 [Pan troglodytes] || Hs.444056 || AA826462 || || || 105507	1.27808	1.87613
|| Transcribed locus, strongly similar to XP_530540.1 LOC459884 [Pan troglodytes] || Hs.194084 || AA932735 || || || 101594	1.62817	0.704799
|| Transcribed locus, strongly similar to XP_531118.1 LOC464096 [Pan troglodytes] || Hs.126813 || AA931221 || || || 106400	1.92147	0.131852
|| Transcribed locus, weakly similar to NP_055301.1 neuronal thread protein AD7c-NTP [Homo sapiens] || Hs.269654 || AA054669 || || || 112386	1.59219	0.367894
|| Transcribed locus, weakly similar to NP_055301.1 neuronal thread protein AD7c-NTP [Homo sapiens] || Hs.547153 || W74071 || || || 101484	1.49892	0.704799
|| Transcribed locus, weakly similar to NP_060190.1 signal-transducing adaptor protein-2 [Homo sapiens] || Hs.150401 || AA857391 || || || 105927	1.60204	0.451626
|| Transcribed locus, weakly similar to NP_060312.1 hypothetical protein FLJ20489 [Homo sapiens] || Hs.150093 || AI298567 || || || 319528	1.90087	0
|| Transcribed locus, weakly similar to NP_060312.1 hypothetical protein FLJ20489 [Homo sapiens] || Hs.552014 || AI302661 || || || 318274	1.35485	0.793728
|| Transcribed locus, weakly similar to NP_062553.1 hypothetical protein FLJ11267 [Homo sapiens] || Hs.116465 || AA631782 || || || 103092	1.32588	1.47707
|| Transcribed locus, weakly similar to NP_079012.2 gasdermin domain containing 1 [Homo sapiens] || Hs.466529 || AA863016 || || || 98561	1.7217	0
|| Transcribed locus, weakly similar to NP_079012.2 gasdermin domain containing 1 [Homo sapiens] || Hs.466529 || AA918715 || || || 101231	1.75323	0.451626
|| Transcribed locus, weakly similar to NP_659411.1 hypothetical protein FLJ31846 [Homo sapiens] || Hs.335052 || AI309321 || || || 313457	1.57225	0.244054
|| Transcribed locus, weakly similar to NP_665872.1 harmonin-interacting ankyrin-repeat containing protein [Homo sapiens] || Hs.498869 || AA587690 || || || 105882	1.52596	0.367894
|| Transcribed locus, weakly similar to NP_689672.2 hypothetical protein MGC45438 [Homo sapiens] || Hs.169444 || AA004527 || || || 98373	1.9885	0
|| Transcribed locus, weakly similar to NP_689672.2 hypothetical protein MGC45438 [Homo sapiens] || Hs.180902 || AI217458 || || || 314695	1.45281	0.247501
|| Transcribed locus, weakly similar to NP_689672.2 hypothetical protein MGC45438 [Homo sapiens] || Hs.77542 || N32811 || || || 115401	1.70743	0.131852
|| Transcribed locus, weakly similar to NP_699177.1 chromosome X open reading frame 20 [Homo sapiens] || Hs.435682 || AI191489 || || || 311923	1.56123	0.244054
|| Transcribed locus, weakly similar to XP_209041.2 KIAA1503 protein [Homo sapiens] || Hs.127051 || AA862339 || || || 117226	1.55402	0.326679
|| Transcribed locus, weakly similar to XP_209041.2 KIAA1503 protein [Homo sapiens] || Hs.131585 || AI025043 || || || 309682	1.86333	0.185724
|| Transcribed locus, weakly similar to XP_347139.1 LOC363435 [Rattus norvegicus] || Hs.369728 || AI280304 || || || 312021	1.41816	0.803811
|| Transcribed locus, weakly similar to XP_371492.2 similar to signal-transducing adaptor protein-2; brk kinase substrate [Homo sapiens] || Hs.228084 || AA233643 || || || 115149	1.84904	0.326679
|| Transcribed locus, weakly similar to XP_371904.2 similar to Nuclear protein 1 (Protein p8) (Candidate of metastasis 1) [Homo sapiens] || Hs.535882 || AA459937 || || || 112972	1.35972	1.16101
|| Transcribed locus, weakly similar to XP_375410.1 hypothetical gene supported by AK123100 [Homo sapiens] || Hs.522966 || AA932785 || || || 100996	1.61557	0.451626
|| Transcribed locus, weakly similar to XP_375935.1 hypothetical protein LOC284825 [Homo sapiens] || Hs.134812 || AI088179 || || || 317781	1.59743	0.244054
|| Transcribed locus, weakly similar to XP_379430.1 hypothetical protein LOC285758 [Homo sapiens] || Hs.548071 || AI299461 || || || 317974	1.98972	0
|| Transcribed locus, weakly similar to XP_484234.1 RIKEN cDNA 6330500D04 gene [Mus musculus] || Hs.435696 || AI208158 || || || 316100	1.48934	0.542583
|| Transcribed locus, weakly similar to XP_496299.1 hypothetical protein LOC148206 [Homo sapiens] || Hs.356704 || AA483639 || || || 120470	2.45631	0
|| Transcribed locus, weakly similar to XP_497011.1 FLJ16323 protein [Homo sapiens] || Hs.112715 || AA609483 || || || 100529	2.41964	0.185724
|| Transcribed locus, weakly similar to XP_510104.1 similar to hypothetical protein FLJ25224 [Pan troglodytes] || Hs.128605 || AA907020 || || || 307469	2.12544	0
|| Transcribed locus, weakly similar to XP_510104.1 similar to hypothetical protein FLJ25224 [Pan troglodytes] || Hs.136452 || AA573657 || || || 106418	1.5261	0.793728
|| Transcribed locus, weakly similar to XP_510104.1 similar to hypothetical protein FLJ25224 [Pan troglodytes] || Hs.333405 || AI051423 || || || 320013	1.60316	0.364305
|| Transcribed locus, weakly similar to XP_510104.1 similar to hypothetical protein FLJ25224 [Pan troglodytes] || Hs.504085 || AI299236 || || || 318092	1.7153	0.131852
|| Transcribed locus, weakly similar to XP_510104.1 similar to hypothetical protein FLJ25224 [Pan troglodytes] || Hs.545019 || AA782308 || || || 98846	1.70923	0.542583
|| Transcribed locus, weakly similar to XP_510204.1 similar to BC022687 protein [Pan troglodytes] || Hs.134920 || AI093016 || || || 314636	1.81323	0.247501
|| Transcribed locus, weakly similar to XP_511938.1 LOC455191 [Pan troglodytes] || Hs.546893 || AA563615 || || || 111398	2.03656	0
|| Transcribed locus, weakly similar to XP_513056.1 similar to filamin-binding LIM protein-1 [Pan troglodytes] || Hs.148383 || AI083876 || || || 313673	1.56959	0.451626
|| Transcribed locus, weakly similar to XP_513408.1 similar to origin recognition complex, subunit 1; origin recognition complex, subunit 1, S. cerevisiae, homolog-like; origin recognition complex 1; rep || Hs.136371 || AA506092 || || || 102507	1.49751	1.47707
|| Transcribed locus, weakly similar to XP_515470.1 LOC459226 [Pan troglodytes] || Hs.55563 || W37327 || || || 105178	1.53646	0.364305
|| Transcribed locus, weakly similar to XP_517454.1 similar to hypothetical protein MGC45438 [Pan troglodytes] || Hs.146135 || AI263383 || || || 311387	1.53188	0.131852
|| Transcribed locus, weakly similar to XP_517454.1 similar to hypothetical protein MGC45438 [Pan troglodytes] || Hs.517236 || AA485280 || || || 108040	1.58837	0
|| Transcribed locus, weakly similar to XP_517655.1 similar to KIAA0825 protein [Pan troglodytes] || Hs.146317 || N80308 || || || 106514	1.70774	0
|| Transcribed locus, weakly similar to XP_518535.1 similar to dJ108C2.1.4 (MCM3 minichromosome maintenance deficient 3 (S. cerevisiae), variant 4) [Pan troglodytes] || Hs.380240 || AI025974 || || || 308689	2.05554	0.131852
|| Transcribed locus, weakly similar to XP_518535.1 similar to dJ108C2.1.4 (MCM3 minichromosome maintenance deficient 3 (S. cerevisiae), variant 4) [Pan troglodytes] || Hs.529531 || T95650 || || || 108100	1.36169	1.68793
|| Transcribed locus, weakly similar to XP_520532.1 similar to NOL6 protein [Pan troglodytes] || Hs.222221 || AA505898 || || || 119637	2.64591	0
|| Transcribed locus, weakly similar to XP_535753.1 similar to B15 subunit of the NADH: ubiquinone oxidoreductase complex [Canis familiaris] || Hs.156668 || AI347706 || || || 315473	1.38107	1.16101
|| Transcribed locus, weakly similar to XP_536818.1 similar to RIKEN cDNA 2700055K07 [Canis familiaris] || Hs.551968 || AA045524 || || || 109858	1.43632	0.793728
ABCA1 || ATP-binding cassette, sub-family A (ABC1), member 1 || Hs.429294 || AI206275 || || 19 || 318014	1.45875	0.542583
ABCA7 || ATP-binding cassette, sub-family A (ABC1), member 7 || Hs.134514 || AI668630 || || 10347 || 107853	1.36641	0.94976
ABCA7 || ATP-binding cassette, sub-family A (ABC1), member 7 || Hs.134514 || AI668632 || || 10347 || 100175	1.35881	2.01742
ABCB5 || ATP-binding cassette, sub-family B (MDR/TAP), member 5 || Hs.404102 || AA418850 || || 340273 || 107065	1.57457	0.131852
ABCB5 || ATP-binding cassette, sub-family B (MDR/TAP), member 5 || Hs.404102 || H98200 || || 340273 || 103272	1.48289	0.247501
ABCF1 || ATP-binding cassette, sub-family F (GCN20), member 1 || Hs.9573 || AA485752 || || 23 || 111590	1.62753	0.542583
ABHD5 || Abhydrolase domain containing 5 || Hs.19385 || AI241278 || || 51099 || 311782	1.57364	1.07143
ABHD6 || Abhydrolase domain containing 6 || Hs.476454 || H65409 || || 57406 || 106567	1.41552	0.704799
ABR || Active BCR-related gene || Hs.159306 || AI042100 || || 29 || 316021	1.52761	0.704799
ACACA || Acetyl-Coenzyme A carboxylase alpha || Hs.160556 || AI652142 || || 31 || 330538	1.74218	0.185724
ACADSB || Acyl-Coenzyme A dehydrogenase, short/branched chain || Hs.81934 || T69270 || || 36 || 111938	1.43195	0.364305
ACBD3 || Acyl-Coenzyme A binding domain containing 3 || Hs.520207 || AA255954 || || 64746 || 101711	1.35273	1.87613
ACBD6 || Acyl-Coenzyme A binding domain containing 6 || Hs.200051 || R36512 || || 84320 || 112352	1.37662	1.16101
ACCN2 || Amiloride-sensitive cation channel 2, neuronal || Hs.274361 || AI017398 || || 41 || 224270	1.39971	0.451626
ACPP || Acid phosphatase, prostate || Hs.433060 || AI926993 || || 55 || 330284	2.25789	0
ACRC || Acidic repeat containing || Hs.135167 || AI276640 || || 93953 || 311919	1.55087	0.451626
ACRV1 || Acrosomal vesicle protein 1 || Hs.169222 || H93373 || || 56 || 105463	1.44815	0.326679
ACSL6 || Acyl-CoA synthetase long-chain family member 6 || Hs.14945 || AA426087 || || 23305 || 102076	1.41054	1.68793
ACTR3 || ARP3 actin-related protein 3 homolog (yeast) || Hs.433512 || AA164562 || || 10096 || 101839	1.32253	1.16101
ACTR3 || ARP3 actin-related protein 3 homolog (yeast) || Hs.433512 || R84375 || || 10096 || 109923	1.31902	1.68793
ACVR1B || Activin A receptor, type IB || Hs.438918 || AI972229 || || 91 || 330910	1.88728	0.131852
ACVRL1 || Activin A receptor type II-like 1 || Hs.410104 || N95334 || TGF beta receptor type I || 94 || 178349	1.32375	1.68793
AD031 || AD031 protein || Hs.44004 || AI352084 || || 83935 || 317006	1.38888	2.01742
AD031 || AD031 protein || Hs.44004 || R21422 || || 83935 || 99984	1.57826	0.364305
ADAM12 || A disintegrin and metalloproteinase domain 12 (meltrin alpha) || Hs.386283 || AI066545 || || 8038 || 311707	1.44053	0.803811
ADAM12 || A disintegrin and metalloproteinase domain 12 (meltrin alpha) || Hs.386283 || R33104 || || 8038 || 319342	1.68679	0.367894
ADAM12 || A disintegrin and metalloproteinase domain 12 (meltrin alpha) || Hs.386283 || R63330 || || 8038 || 308784	1.63052	0.247501
ADAM22 || A disintegrin and metalloproteinase domain 22 || Hs.256398 || N29801 || || 53616 || 117073	1.47571	0.451626
ADCY1 || Adenylate cyclase 1 (brain) || Hs.192215 || AI081368 || || 107 || 313103	1.32259	1.68793
ADCY9 || Adenylate cyclase 9 || Hs.391860 || T64004 || || 115 || 107279	1.33284	0.803811
ADH6 || Alcohol dehydrogenase 6 (class V) || Hs.518892 || AI244615 || || 130 || 308061	1.34109	1.68793
ADNP || Activity-dependent neuroprotector || Hs.293736 || N67071 || || 23394 || 112120	1.44383	1.07143
AGT || Angiotensinogen (serine (or cysteine) proteinase inhibitor, clade A (alpha-1 antiproteinase, antitrypsin), member 8) || Hs.19383 || R02546 || || 183 || 120134	1.62798	0.542583
AIP || Aryl hydrocarbon receptor interacting protein || Hs.412433 || AA454926 || || 9049 || 117249	1.54494	0.367894
AK3L1 || Adenylate kinase 3 like 1 || Hs.493362 || N99715 || || 50808 || 109431	1.37326	1.07143
AKAP13 || A kinase (PRKA) anchor protein 13 || Hs.459211 || AA974181 || || 11214 || 313450	1.29391	1.68793
AKAP4 || A kinase (PRKA) anchor protein 4 || Hs.97633 || AI025520 || || 8852 || 220735	1.39495	0.364305
ALDH6A1 || **Aldehyde dehydrogenase 6 family, member A1 || Hs.293970 || AI821444 || || 4329 || 107702	1.64208	0.326679
ALDH6A1 || **Aldehyde dehydrogenase 6 family, member A1 || Hs.293970 || N62179 || || 4329 || 101576	1.73199	0.367894
ALDH7A1 || Aldehyde dehydrogenase 7 family, member A1 || Hs.483239 || AI039375 || || 501 || 319898	1.49256	0.704799
ALDRL6 || Aldehyde reductase (aldose reductase) like 6 || Hs.129227 || AA991342 || || 55586 || 113760	1.37937	1.47707
ALDRL6 || Aldehyde reductase (aldose reductase) like 6 || Hs.129227 || AI253233 || || 55586 || 113320	2.06391	0.131852
ALG6 || Asparagine-linked glycosylation 6 homolog (yeast, alpha-1,3-glucosyltransferase) || Hs.80042 || N63143 || || 29929 || 119670	1.90598	0
ALK || Anaplastic lymphoma kinase (Ki-1) || Hs.196534 || AI367817 || || 238 || 317700	1.59522	0.367894
ALKBH || AlkB, alkylation repair homolog (E. coli) || Hs.94542 || AA609609 || || 8846 || 117804	1.4914	1.07143
ALMS1 || Alstrom syndrome 1 || Hs.184720 || AA694488 || || 7840 || 222021	1.44415	0.542583
ALS2CR15 || Amyotrophic lateral sclerosis 2 (juvenile) chromosome region, candidate 14 || Hs.516629 || N66336 || || 130026 || 120720	1.34399	0.803811
AMPD1 || Adenosine monophosphate deaminase 1 (isoform M) || Hs.89570 || AA086476 || || 270 || 101184	2.22116	0
AMY2A || Amylase, alpha 2A; pancreatic || Hs.514463 || AA844818 || || 279 || 117330	1.40475	2.01742
ANAPC10 || Anaphase promoting complex subunit 10 || Hs.480876 || AA505486 || || 10393 || 98384	1.69177	0.704799
ANK2 || Ankyrin 2, neuronal || Hs.137367 || AA782337 || || 287 || 109919	1.54968	0.364305
ANKRD1 || Ankyrin repeat domain 1 (cardiac muscle) || Hs.448589 || AA969184 || || 27063 || 225345	1.8956	1.68793
ANKRD26 || Ankyrin repeat domain 26 || Hs.361041 || AI023136 || || 22852 || 310924	1.65264	0.131852
ANKRD6 || Ankyrin repeat domain 6 || Hs.177275 || R59488 || Unknown || 22881 || 106552	1.52495	0.542583
ANKS1 || Ankyrin repeat and sterile alpha motif domain containing 1 || Hs.132639 || AI049718 || || 23294 || 114364	1.39286	1.07143
ANTXR2 || Anthrax toxin receptor 2 || Hs.162963 || AA225906 || || 118429 || 102405	1.41826	0.542583
ANXA13 || Annexin A13 || Hs.181107 || AA884167 || || 312 || 119463	1.35341	1.32401
ANXA13 || Annexin A13 || Hs.181107 || AI984289 || || 312 || 331339	1.39827	0.803811
ANXA6 || Annexin A6 || Hs.412117 || AA872001 || || 309 || 112894	1.58089	0.803811
AOAH || Acyloxyacyl hydrolase (neutrophil) || Hs.488007 || AA573860 || || 313 || 113951	1.60848	0.451626
AOC2 || Amine oxidase, copper containing 2 (retina-specific) || Hs.143102 || AA775448 || || 314 || 222903	1.30767	1.68793
AOC3 || Amine oxidase, copper containing 3 (vascular adhesion protein 1) || Hs.198241 || AI871588 || || 8639 || 331001	1.603	0.364305
AOF2 || Amine oxidase (flavin containing) domain 2 || Hs.549117 || AA193380 || || 23028 || 113652	1.60538	0.326679
APBB2 || Amyloid beta (A4) precursor protein-binding, family B, member 2 (Fe65-like) || Hs.479602 || AA553762 || || 323 || 111344	2.56431	0
APBB2 || Amyloid beta (A4) precursor protein-binding, family B, member 2 (Fe65-like) || Hs.479602 || AA866113 || || 323 || 100972	1.4521	1.07143
APEX2 || APEX nuclease (apurinic/apyrimidinic endonuclease) 2 || Hs.154149 || AI674393 || || 27301 || 312796	1.5532	0.244054
APOBEC1 || Apolipoprotein B mRNA editing enzyme, catalytic polypeptide 1 || Hs.560 || AA587939 || || 339 || 98713	1.86749	0.326679
APOBEC1 || Apolipoprotein B mRNA editing enzyme, catalytic polypeptide 1 || Hs.560 || AI862416 || || 339 || 330830	1.53656	0.425188
APPBP2 || Amyloid beta precursor protein (cytoplasmic tail) binding protein 2 || Hs.84084 || AA431206 || || 10513 || 117878	1.47463	1.07143
APXL2 || Apical protein 2 || Hs.519574 || AI214184 || || 134549 || 315985	1.64427	0
AQP2 || Aquaporin 2 (collecting duct) || Hs.130730 || AA995875 || || 359 || 310292	1.65388	0.185724
AQP9 || Aquaporin 9 || Hs.104624 || AA621132 || || 366 || 106047	1.43658	0.803811
ARF6 || ADP-ribosylation factor 6 || Hs.525330 || N22897 || || 382 || 104378	1.33473	1.07143
ARFGEF2 || ADP-ribosylation factor guanine nucleotide-exchange factor 2 (brefeldin A-inhibited) || Hs.62578 || AA581123 || || 10564 || 119264	1.48871	0.94976
ARGBP2 || Arg/Abl-interacting protein ArgBP2 || Hs.481342 || AA142913 || || 8470 || 117072	1.40248	0.704799
ARHGAP26 || Rho GTPase activating protein 26 || Hs.293593 || AA878224 || || 23092 || 109624	1.53049	0.185724
ARHGAP26 || Rho GTPase activating protein 26 || Hs.293593 || AI352622 || || 23092 || 307019	1.27081	2.01742
ARHGAP28 || Rho GTPase activating protein 28 || Hs.183114 || AA905638 || || 79822 || 310767	1.39004	1.87613
ARHGAP8 || Rho GTPase activating protein 8 || Hs.102336 || AI342037 || || 23779 || 317558	1.54093	0.425188
ARHGAP8 || Rho GTPase activating protein 8 || Hs.102336 || R69153 || || 23779 || 111677	1.50495	1.16101
ARIH1 || Ariadne homolog, ubiquitin-conjugating enzyme E2 binding protein, 1 (Drosophila) || Hs.268787 || AA704752 || || 25820 || 223132	1.45896	0.542583
ARIH2 || Ariadne homolog 2 (Drosophila) || Hs.241558 || AA192740 || || 10425 || 315856	1.43912	1.07143
ARL6IP2 || ADP-ribosylation factor-like 6 interacting protein 2 || Hs.190440 || N22218 || || 64225 || 101803	1.44052	0.704799
ARMC2 || ATP synthase, H+ transporting, mitochondrial F0 complex, subunit f, isoform 2 || Hs.282925 || N50662 || || 84071 || 222750	1.75009	0.131852
ASCC3 || DJ467N11.1 protein || Hs.486031 || AA563682 || || 10973 || 103661	1.40629	1.62173
ATAD1 || ATPase family, AAA domain containing 1 || Hs.435948 || R42168 || || 84896 || 105583	1.36699	1.47707
ATF7 || Activating transcription factor 7 || Hs.12286 || R43026 || || 11016 || 102402	1.61414	0.367894
ATF7 || Activating transcription factor 7 || Hs.12286 || W45393 || || 11016 || 103521	1.52165	0.425188
ATM || Ataxia telangiectasia mutated (includes complementation groups A, C and D) || Hs.435561 || AA460148 || || 472 || 317395	1.42366	0.793728
ATP11C || ATPase, Class VI, type 11C || Hs.88252 || AA609914 || || 286410 || 111786	1.37167	1.62173
ATP5H || ATP synthase, H+ transporting, mitochondrial F0 complex, subunit d || Hs.514465 || AA504246 || || 10476 || 225298	1.41695	0.94976
ATP5J || ATP synthase, H+ transporting, mitochondrial F0 complex, subunit F6 || Hs.246310 || AA504465 || ATP5A=mitochondrial ATPase coupling factor 6 subunit || 522 || 111892	1.66056	0.326679
ATP5J || ATP synthase, H+ transporting, mitochondrial F0 complex, subunit F6 || Hs.246310 || R68463 || || 522 || 106377	1.60745	1.32401
ATP6V0E || ATPase, H+ transporting, lysosomal 9kDa, V0 subunit e || Hs.484188 || AA486112 || || 8992 || 107513	1.52063	1.87613
ATP6V1C1 || ATPase, H+ transporting, lysosomal 42kDa, V1 subunit C, isoform 1 || Hs.86905 || N33243 || || 528 || 221157	1.54567	0.185724
ATP7A || ATPase, Cu++ transporting, alpha polypeptide (Menkes syndrome) || Hs.496414 || AA236141 || || 538 || 113591	1.45585	0.542583
ATP7B || ATPase, Cu++ transporting, beta polypeptide (Wilson disease) || Hs.492280 || N26536 || || 540 || 106777	1.46137	0.793728
AUH || AU RNA binding protein/enoyl-Coenzyme A hydratase || Hs.175905 || AA689487 || || 549 || 116981	1.51142	0.247501
AUP1 || Ancient ubiquitous protein 1 || Hs.411480 || AA459427 || || 550 || 223361	1.43692	0.364305
AVO3 || Likely ortholog of mouse TORC2-specific protein AVO3 (S. cerevisiae) || Hs.407926 || N80490 || || 253260 || 310020	1.37986	1.62173
AXOT || Membrane-associated ring finger (C3HC4) 7 || Hs.529272 || W20438 || || 64844 || 110042	1.54986	0.326679
B7 || B7 gene || Hs.155586 || N90281 || || 10233 || 106012	1.65005	0.185724
BAI2 || Brain-specific angiogenesis inhibitor 2 || Hs.524138 || AA777034 || || 576 || 223470	1.69048	0.131852
BAX || BCL2-associated X protein || Hs.159428 || AI565203 || || 581 || 311735	1.38062	1.47707
BAZ2B || Bromodomain adjacent to zinc finger domain, 2B || Hs.470369 || T40212 || || 29994 || 116547	1.46428	0.542583
BBOX1 || Butyrobetaine (gamma), 2-oxoglutarate dioxygenase (gamma-butyrobetaine hydroxylase) 1 || Hs.144845 || AI222515 || || 8424 || 106686	1.25467	1.87613
BCAP29 || **B-cell receptor-associated protein 29 || Hs.303787 || AA394241 || || 55973 || 101851	2.58731	0
BCL11A || B-cell CLL/lymphoma 11A (zinc finger protein) || Hs.370549 || AA670325 || || 53335 || 226695	1.30049	1.32401
BCL2A1 || BCL2-related protein A1 || Hs.227817 || AA459263 || A1=Bfl-1=GRs=Bcl-2 related protein || 597 || 109700	1.45211	0.704799
BCL6B || B-cell CLL/lymphoma 6, member B (zinc finger protein) || Hs.22575 || N92359 || Similar to BCL-6 zinc finger region || 255877 || 102280	1.89016	0
BCR || Breakpoint cluster region || Hs.517461 || AI968010 || || 613 || 331180	1.85721	0.131852
BDNF || Brain-derived neurotrophic factor || Hs.502182 || AA234298 || || 627 || 119015	1.70369	0.247501
BET3L || BET3 like (S. cerevisiae) || Hs.134795 || AI090359 || || 221300 || 313302	1.33738	1.07143
BGR || Bubblegum related protein || Hs.465720 || AI023201 || || 81616 || 309879	1.78325	0.185724
BIK || BCL2-interacting killer (apoptosis-inducing) || Hs.475055 || AA291322 || NBK=BIK=BCL-2 interacting killer=apoptotic inducer protein || 638 || 161718	1.45891	0.542583
BIK || BCL2-interacting killer (apoptosis-inducing) || Hs.475055 || AI347538 || || 638 || 308964	1.41485	0.94976
BIN3 || Bridging integrator 3 || Hs.521444 || H96791 || || 55909 || 102466	1.41429	0.451626
BLOC1S1 || Biogenesis of lysosome-related organelles complex-1, subunit 1 || Hs.94672 || H94857 || || 2647 || 118368	2.39402	0
BMPR2 || Bone morphogenetic protein receptor, type II (serine/threonine kinase) || Hs.471119 || N20203 || || 659 || 99000	1.34673	1.16101
BRAF || V-raf murine sarcoma viral oncogene homolog B1 || Hs.490366 || R91059 || || 673 || 111267	1.59553	0.185724
BRD2 || Bromodomain containing 2 || Hs.75243 || AA568915 || || 6046 || 105841	2.15577	0
BRDG1 || BCR downstream signaling 1 || Hs.435579 || AI289185 || || 26228 || 312453	1.58449	0.131852
BRI3 || Brain protein I3 || Hs.410497 || AA670434 || || 25798 || 222765	1.71799	0.793728
BST1 || Bone marrow stromal cell antigen 1 || Hs.169998 || H59247 || || 683 || 315877	1.49977	1.07143
BST1 || Bone marrow stromal cell antigen 1 || Hs.169998 || N32106 || || 683 || 241908	1.8675	0.793728
BST1 || Bone marrow stromal cell antigen 1 || Hs.169998 || N72947 || || 683 || 115390	1.68896	1.47707
BTBD14A || BTB (POZ) domain containing 14A || Hs.112895 || AA620746 || || 138151 || 98737	1.8462	0.185724
BTBD9 || BTB (POZ) domain containing 9 || Hs.116233 || N62516 || || 114781 || 102989	1.69793	0.0990004
BTN3A2 || Butyrophilin, subfamily 3, member A2 || Hs.376046 || AA888172 || || 11118 || 308542	1.26685	1.62173
C10orf108 || Chromosome 10 open reading frame 108 || Hs.152803 || N92571 || || 414235 || 104282	1.40324	0.364305
C10orf87 || Chromosome 10 open reading frame 87 || Hs.422466 || W60286 || || 118663 || 103609	1.77259	0.131852
C10orf88 || Chromosome 10 open reading frame 88 || Hs.501286 || AA609770 || || 80007 || 98398	1.48487	0.364305
C10orf89 || Chromosome 10 open reading frame 89 || Hs.281004 || AA707613 || || 118672 || 225876	1.8488	0
C11orf9 || Chromosome 11 open reading frame 9 || Hs.473109 || AA662915 || || 745 || 102018	1.76119	0.0990004
C12orf8 || Chromosome 12 open reading frame 8 || Hs.75841 || AA682851 || || 10961 || 114782	1.86987	0.803811
C13orf25 || Chromosome 13 open reading frame 25 || Hs.24115 || AA256157 || || 407975 || 115921	1.38536	1.32401
C14orf122 || Chromosome 14 open reading frame 122 || Hs.271614 || AI492130 || || 51016 || 318286	1.38025	1.47707
C14orf2 || Chromosome 14 open reading frame 2 || Hs.109052 || T83147 || || 9556 || 117325	1.57715	1.62173
C14orf24 || **Chromosome 14 open reading frame 24 || Hs.446357 || AA035038 || || 283635 || 221156	1.39044	2.01742
C15orf27 || Chromosome 15 open reading frame 27 || Hs.458965 || AA469246 || || 123591 || 117968	1.47309	0.185724
C15orf29 || Chromosome 15 open reading frame 29 || Hs.510938 || N35078 || || 79768 || 307976	1.33716	1.07143
C16orf34 || Chromosome 16 open reading frame 34 || Hs.513261 || AA884077 || || 90861 || 314618	1.73776	0.185724
C16orf44 || Chromosome 16 open reading frame 44 || Hs.222731 || AI278069 || || 79786 || 318641	1.65542	0.542583
C16orf9 || Chromosome 16 open reading frame 9 || Hs.513225 || AA046535 || || 83986 || 221173	1.59545	0.326679
C18orf1 || Chromosome 18 open reading frame 1 || Hs.464697 || N48737 || || 753 || 120563	1.56818	0.451626
C18orf9 || Chromosome 18 open reading frame 9 || Hs.236940 || AA482139 || || 79959 || 315180	1.41914	0.367894
C18orf9 || Chromosome 18 open reading frame 9 || Hs.236940 || AA936518 || || 79959 || 309061	1.45195	1.16101
C19orf32 || Chromosome 19 open reading frame 32 || Hs.76277 || AA443936 || || 92840 || 117709	1.27248	2.01742
C1GALT2 || C1GALT1-specific chaperone 1 || Hs.134856 || AA258030 || || 29071 || 222804	1.33291	1.87613
C1orf34 || Chromosome 1 open reading frame 34 || Hs.112949 || AA621192 || || 22996 || 116135	1.35583	1.62173
C1QA || Complement component 1, q subcomponent, alpha polypeptide || Hs.9641 || AI074177 || || 712 || 114131	2.19022	0
C1QR1 || Complement component 1, q subcomponent, receptor 1 || Hs.97199 || AA150505 || || 22918 || 226090	1.40823	0.94976
C1QR1 || Complement component 1, q subcomponent, receptor 1 || Hs.97199 || AI380234 || Unknown UG Hs.97199 Human Clq/MBL/SPA receptor C1qR(p) mRN || 22918 || 191300	1.60764	0.185724
C20orf121 || Chromosome 20 open reading frame 121 || Hs.283869 || AA426597 || || 79183 || 318969	1.64366	0.326679
C20orf29 || Chromosome 20 open reading frame 29 || Hs.104806 || AA418483 || || 55317 || 108066	1.593	1.47707
C20orf30 || Chromosome 20 open reading frame 30 || Hs.472024 || W42927 || || 29058 || 104794	1.36273	0.425188
C20orf39 || Chromosome 20 open reading frame 39 || Hs.124638 || AA857118 || || 79953 || 104922	1.41948	0.704799
C20orf39 || Chromosome 20 open reading frame 39 || Hs.124638 || AA918129 || || 79953 || 98607	1.32809	1.62173
C20orf58 || Chromosome 20 open reading frame 58 || Hs.46627 || N90809 || || 128414 || 221994	1.30163	1.87613
C20orf75 || Chromosome 20 open reading frame 75 || Hs.149133 || AA464555 || || 164312 || 116895	1.77529	0.185724
C21orf106 || Chromosome 21 open reading frame 106 || Hs.189585 || AA872222 || || 23181 || 102635	1.9197	0
C21orf22 || Chromosome 21 open reading frame 22 || Hs.98186 || AA417025 || || 54089 || 117252	1.68948	0.425188
C21orf4 || Chromosome 21 open reading frame 4 || Hs.433668 || N90335 || || 757 || 115420	1.40644	0.94976
C21orf51 || Chromosome 21 open reading frame 51 || Hs.303798 || AI253185 || || 54065 || 100709	2.57388	0.0990004
C2orf13 || Chromosome 2 open reading frame 13 || Hs.258941 || AA127851 || || 200558 || 103677	1.46296	0.451626
C3orf14 || Chromosome 3 open reading frame 14 || Hs.47166 || AA581483 || || 57415 || 118801	1.74323	0.131852
C4orf8 || Chromosome 4 open reading frame 8 || Hs.125348 || AA876476 || || 8603 || 103797	1.81083	0.131852
C5orf13 || Chromosome 5 open reading frame 13 || Hs.483067 || N91952 || || 9315 || 106575	1.632	0.803811
C5orf19 || Chromosome 5 open reading frame 19 || Hs.416090 || AI360217 || || 51308 || 309168	1.51577	0.244054
C6orf1 || Chromosome 6 open reading frame 1 || Hs.381300 || AA491208 || || 221491 || 225574	1.88928	0.131852
C6orf105 || Chromosome 6 open reading frame 105 || Hs.126409 || AA426092 || || 84830 || 108582	1.37449	1.68793
C6orf107 || Chromosome 6 open reading frame 107 || Hs.549169 || AA594132 || || 54887 || 100868	2.07806	0
C6orf110 || **Chromosome 6 open reading frame 110 || Hs.414473 || AA284236 || || 55362 || 117589	1.47632	1.68793
C6orf115 || Chromosome 6 open reading frame 115 || Hs.238205 || AA287306 || || 58527 || 223777	1.35462	1.32401
C6orf166 || Hypothetical protein PRO2266 || Hs.485915 || AA504264 || Unknown UG Hs.105724 ESTs || 55122 || 162302	1.43019	0.704799
C6orf170 || Chromosome 6 open reading frame 170 || Hs.121396 || AI052103 || || 221322 || 313744	1.85803	0.0990004
C6orf210 || Chromosome 6 open reading frame 210 || Hs.486095 || AA609294 || || 57107 || 111339	1.48489	1.87613
C6orf65 || Chromosome 6 open reading frame 65 || Hs.199876 || N52043 || || 221336 || 108718	1.5202	0.367894
C8orf13 || Chromosome 8 open reading frame 13 || Hs.124299 || AA913821 || || 83648 || 319153	1.38579	1.62173
C9orf110 || Chromosome 9 open reading frame 110 || Hs.449459 || AA398212 || || 401549 || 112995	1.5789	0.451626
C9orf148 || Chromosome 9 open reading frame 148 || Hs.101439 || AA609430 || || 401550 || 111779	1.37528	1.68793
C9orf28 || Chromosome 9 open reading frame 28 || Hs.162659 || R85261 || || 89853 || 120525	1.25286	2.01742
C9orf47 || Chromosome 9 open reading frame 47 || Hs.546252 || AA233892 || || 286223 || 113461	1.45798	1.32401
C9orf52 || Chromosome 9 open reading frame 52 || Hs.130086 || AA485425 || || 158219 || 106164	1.46404	1.87613
CA11 || Carbonic anhydrase XI || Hs.428446 || N52089 || || 770 || 116764	1.40784	0.94976
CA4 || Carbonic anhydrase IV || Hs.89485 || AA855158 || || 762 || 100606	1.39784	1.32401
CACH-1 || Cytosolic acetyl-CoA hydrolase || Hs.439127 || AA002091 || || 134526 || 112890	1.40827	1.68793
CACNA1C || Calcium channel, voltage-dependent, L type, alpha 1C subunit || Hs.335817 || AI016238 || || 775 || 308168	1.54261	0.131852
CACNA1C || Calcium channel, voltage-dependent, L type, alpha 1C subunit || Hs.335817 || AI202954 || || 775 || 310474	1.4679	0.704799
CACNA2D4 || Calcium channel, voltage-dependent, alpha 2/delta subunit 4 || Hs.13768 || AA521470 || || 93589 || 223434	1.28558	2.01742
CACNG1 || **Calcium channel, voltage-dependent, gamma subunit 1 || Hs.147989 || W73406 || || 786 || 102037	1.35603	1.07143
CAMK1 || Calcium/calmodulin-dependent protein kinase I || Hs.434875 || AW004620 || || 8536 || 331301	1.77772	0.131852
CAMK1D || Calcium/calmodulin-dependent protein kinase ID || Hs.156723 || AA903749 || || 57118 || 313910	1.63099	0.131852
CAMK4 || Calcium/calmodulin-dependent protein kinase IV || Hs.220629 || AA455227 || calmodulin-dependent protein kinase IV || 814 || 111679	1.4099	1.62173
CAMLG || Calcium modulating ligand || Hs.529846 || AA521411 || || 819 || 103106	1.52897	1.68793
CAMTA1 || Calmodulin binding transcription activator 1 || Hs.397705 || H71092 || || 23261 || 111542	1.32667	2.01742
CAMTA2 || Calmodulin binding transcription activator 2 || Hs.373952 || AA458480 || || 23125 || 105193	1.64441	0.185724
CANT1 || Calcium activated nucleotidase 1 || Hs.8859 || AA587773 || || 124583 || 112696	1.90801	0.131852
CAPN10 || Calpain 10 || Hs.112218 || AA489024 || Unknown UG Hs.112218 ESTs || 11132 || 185505	1.32494	1.47707
CAPN5 || Calpain 5 || Hs.248153 || H81543 || || 726 || 119392	2.24167	0
CASP7 || Caspase 7, apoptosis-related cysteine protease || Hs.9216 || N46093 || || 840 || 307667	1.41385	1.47707
CASP8AP2 || CASP8 associated protein 2 || Hs.546332 || R28302 || || 9994 || 101661	1.67369	0.247501
CAST || Calpastatin || Hs.440961 || AA412186 || || 831 || 117034	1.47283	0.244054
CBLB || Cas-Br-M (murine) ecotropic retroviral transforming sequence b || Hs.430589 || AI301080 || || 868 || 312010	1.71197	0.803811
CBS || Cystathionine-beta-synthase || Hs.533013 || AA866043 || || 875 || 313831	1.42454	0.704799
CCDC7 || Coiled-coil domain containing 7 || Hs.436242 || AA292481 || Unknown UG Hs.139515 ESTs sc_id3976 || 221016 || 186274	1.43907	1.68793
CCL22 || Chemokine (C-C motif) ligand 22 || Hs.534347 || AI457797 || || 6367 || 330726	1.28344	2.01742
CCL28 || Chemokine (C-C motif) ligand 28 || Hs.334633 || R36539 || || 56477 || 120584	1.31218	1.47707
CCNC || Cyclin C || Hs.430646 || AA609983 || || 892 || 100904	1.63825	0
CCR7 || Chemokine (C-C motif) receptor 7 || Hs.370036 || AI672677 || || 1236 || 330447	1.95786	0
CCRK || Cell cycle related kinase || Hs.522274 || N32045 || || 23552 || 103409	1.89425	0
CCT7 || Chaperonin containing TCP1, subunit 7 (eta) || Hs.368149 || AA883865 || || 10574 || 222056	1.38917	0.793728
CD22 || CD22 antigen || Hs.262150 || AA933994 || || 933 || 313730	1.47125	0.367894
CD226 || CD226 antigen || Hs.369661 || AI361991 || || 10666 || 306908	1.35513	1.16101
CD37 || CD37 antigen || Hs.166556 || AA489700 || || 951 || 310869	1.40681	1.07143
CD72 || CD72 antigen || Hs.116481 || AA812996 || || 971 || 112144	1.38483	1.32401
CD80 || CD80 antigen (CD28 antigen ligand 1, B7-1 antigen) || Hs.838 || AA983817 || || 941 || 312596	1.72746	0.185724
CD84 || CD84 antigen (leukocyte antigen) || Hs.398093 || AA872418 || || 8832 || 117084	1.49491	1.07143
CD8A || CD8 antigen, alpha polypeptide (p32) || Hs.85258 || AA443584 || CD8 alpha chain || 925 || 110814	1.4146	1.62173
CD97 || CD97 antigen || Hs.466039 || AI651871 || || 976 || 311189	1.38653	1.68793
CD99L2 || CD99 antigen-like 2 || Hs.522805 || AA490911 || || 83692 || 101610	1.51822	0.425188
CDC27 || Cell division cycle 27 || Hs.463295 || T81764 || || 996 || 112582	1.76157	0.244054
CDC2L2 || **Cell division cycle 2-like 2 (PITSLRE proteins) || Hs.515679 || AA287299 || Galactosyltransferase associated protein kinase P58/GTA=CDC- || 985 || 161724	1.58599	0.367894
CDH11 || Cadherin 11, type 2, OB-cadherin (osteoblast) || Hs.116471 || AI040305 || || 1009 || 319668	1.34863	0.704799
CDH18 || Cadherin 18, type 2 || Hs.317632 || AA865745 || || 1016 || 225235	1.40618	1.16101
CDX1 || Caudal type homeo box transcription factor 1 || Hs.1545 || AA527480 || || 1044 || 114009	1.88389	0.247501
CEACAM4 || Carcinoembryonic antigen-related cell adhesion molecule 4 || Hs.12 || AI242105 || || 1089 || 318940	1.33611	1.62173
CELSR3 || Cadherin, EGF LAG seven-pass G-type receptor 3 (flamingo homolog, Drosophila) || Hs.533070 || AA411204 || || 1951 || 103120	1.44831	0.793728
CENTG2 || Trinucleotide repeat containing 17 || Hs.435039 || AI050081 || || 116987 || 102530	1.60196	0
Cep70 || P10-binding protein || Hs.531962 || H96392 || || 80321 || 118565	1.43642	0.425188
CFH || Complement factor H || Hs.363396 || W91942 || || 3075 || 107458	1.68735	0.185724
CGB7 || Chorionic gonadotropin, beta polypeptide 7 || Hs.348402 || AI741512 || || 94027 || 331327	1.33923	1.62173
CGI-90 || CGI-90 protein || Hs.145386 || AI042323 || || 51115 || 311705	1.57894	0.244054
CHCHD3 || Coiled-coil-helix-coiled-coil-helix domain containing 3 || Hs.131434 || AA598618 || || 54927 || 111483	1.3494	1.87613
CHCHD5 || Coiled-coil-helix-coiled-coil-helix domain containing 5 || Hs.375707 || AA999994 || || 84269 || 308260	1.88493	0.185724
CHD5 || Chromodomain helicase DNA binding protein 5 || Hs.522898 || AI369154 || || 26038 || 310707	1.69063	0.185724
CHGA || Chromogranin A (parathyroid secretory protein 1) || Hs.150793 || AI301973 || || 1113 || 319073	2.14557	0
CHI3L1 || Chitinase 3-like 1 (cartilage glycoprotein-39) || Hs.382202 || AA434048 || || 1116 || 107178	1.7601	0
CHIC1 || Cysteine-rich hydrophobic domain 1 || Hs.496323 || AI275092 || || 53344 || 317378	1.57626	0.185724
CHRFAM7A || CHRNA7 (cholinergic receptor, nicotinic, alpha polypeptide 7, exons 5-10) and FAM7A (family with sequence similarity 7A, exons A-E) fusion || Hs.510853 || AA592927 || || 89832 || 102812	2.04725	0
CHRNA3 || Cholinergic receptor, nicotinic, alpha polypeptide 3 || Hs.89605 || AA934915 || || 1136 || 317489	1.41256	0.425188
CHRND || Cholinergic receptor, nicotinic, delta polypeptide || Hs.156289 || AA582607 || || 1144 || 104306	1.55079	0.542583
CICE || Cell death-inducing CIDE-like effector pseudogene || Hs.276310 || AA088748 || || 152302 || 109517	1.9747	0
CISH || Cytokine inducible SH2-containing protein || Hs.8257 || AA427521 || || 1154 || 116288	1.52245	0.803811
CITED1 || **Cbp/p300-interacting transactivator, with Glu/Asp-rich carboxy-terminal domain, 1 || Hs.40403 || AA431126 || || 4435 || 106712	1.31976	1.68793
CKLFSF7 || Chemokine-like factor super family 7 || Hs.440494 || AA454864 || || 112616 || 118710	2.05488	0.131852
CKMT1 || Creatine kinase, mitochondrial 1 (ubiquitous) || Hs.425633 || AA019332 || || 1159 || 116578	1.84748	0.131852
CLCA2 || Chloride channel, calcium activated, family member 2 || Hs.241551 || AI675394 || || 9635 || 316229	2.57885	0
CLCN3 || Chloride channel 3 || Hs.481186 || AA451865 || || 1182 || 308555	1.32581	1.47707
CLCN6 || Chloride channel 6 || Hs.193043 || AA488792 || || 1185 || 317576	1.53532	0.247501
CLCNKA || Chloride channel Ka || Hs.552570 || AA399181 || || 1187 || 111256	2.03485	0.247501
CLDN10 || Claudin 10 || Hs.534377 || AA457739 || || 9071 || 112736	1.9098	0.244054
CLDN8 || Claudin 8 || Hs.162209 || AA769736 || || 9073 || 100624	1.90071	0.185724
CLECSF5 || C-type lectin domain family 5, member A || Hs.546358 || AA836861 || || 23601 || 119930	1.4035	0.793728
CLN3 || Ceroid-lipofuscinosis, neuronal 3, juvenile (Batten, Spielmeyer-Vogt disease) || Hs.446747 || W37752 || || 1201 || 110154	1.35613	1.62173
CLN5 || Ceroid-lipofuscinosis, neuronal 5 || Hs.30213 || N73307 || || 1203 || 222125	1.43599	0.542583
CLN8 || **Ceroid-lipofuscinosis, neuronal 8 (epilepsy, progressive with mental retardation) || Hs.127675 || AA398482 || || 2055 || 118957	1.29019	1.87613
CMRF35 || CD300C antigen || Hs.2605 || AI820764 || || 10871 || 109551	2.13607	0
CMYA5 || Cardiomyopathy associated 5 || Hs.482625 || AA699576 || || 202333 || 225189	1.49991	1.47707
CNKSR1 || Connector enhancer of kinase suppressor of Ras 1 || Hs.16232 || AA459278 || || 10256 || 114058	1.57974	0.247501
COBL || Cordon-bleu homolog (mouse) || Hs.99141 || AA447744 || || 23242 || 117567	1.30685	1.68793
COG2 || Component of oligomeric golgi complex 2 || Hs.211800 || AA504455 || || 22796 || 110013	1.59033	0.364305
COG3 || Component of oligomeric golgi complex 3 || Hs.507948 || AA501982 || || 83548 || 109494	1.4752	0.793728
COL11A2 || Collagen, type XI, alpha 2 || Hs.390171 || N22033 || || 1302 || 119518	1.74215	0
COL11A2 || Collagen, type XI, alpha 2 || Hs.390171 || N66396 || || 1302 || 99835	1.55539	0.364305
COL21A1 || Collagen, type XXI, alpha 1 || Hs.47629 || AA490461 || || 81578 || 98986	1.37012	0.326679
COL5A1 || Collagen, type V, alpha 1 || Hs.210283 || AA488444 || || 1289 || 309548	1.45527	1.32401
COL5A3 || Collagen, type V, alpha 3 || Hs.235368 || AA495788 || || 50509 || 100186	1.45322	1.62173
COL5A3 || Collagen, type V, alpha 3 || Hs.235368 || AA994760 || || 50509 || 312255	1.4372	0.803811
COL8A1 || Collagen, type VIII, alpha 1 || Hs.134830 || AA872420 || || 1295 || 99351	1.72632	0
COPE || Coatomer protein complex, subunit epsilon || Hs.10326 || AA865234 || || 11316 || 112558	1.97318	0
COPS7B || COP9 constitutive photomorphogenic homolog subunit 7B (Arabidopsis) || Hs.335061 || AA976575 || || 64708 || 103464	1.91869	0.131852
COX6C || Cytochrome c oxidase subunit VIc || Hs.351875 || N66158 || || 1345 || 222406	1.43002	1.07143
COX7A1 || Cytochrome c oxidase subunit VIIa polypeptide 1 (muscle) || Hs.421621 || AA872125 || || 1346 || 307888	1.41904	2.01742
COX7B || Cytochrome c oxidase subunit VIIb || Hs.522699 || AA629999 || || 1349 || 115223	1.54005	0.94976
COX7C || Cytochrome c oxidase subunit VIIc || Hs.430075 || AA629719 || || 1350 || 103685	1.92604	0.131852
CPD || Carboxypeptidase D || Hs.446079 || AI298027 || || 1362 || 315206	1.52522	0.185724
CPT1B || Carnitine palmitoyltransferase 1B (muscle) || Hs.439777 || AI375206 || || 1375 || 318144	1.2847	1.07143
CPZ || Carboxypeptidase Z || Hs.78068 || AA427724 || || 8532 || 113308	1.45175	0.542583
CRADD || **CASP2 and RIPK1 domain containing adaptor with death domain || Hs.38533 || AA902585 || || 8738 || 107369	1.43516	0.542583
CREB3L2 || CAMP responsive element binding protein 3-like 2 || Hs.490273 || N92705 || || 64764 || 112848	1.98325	0
CRIM1 || Cysteine-rich motor neuron 1 || Hs.332847 || AA610071 || || 51232 || 114858	1.61694	0.803811
CRIM1 || Cysteine-rich motor neuron 1 || Hs.332847 || AA778314 || || 51232 || 224691	1.62583	0.247501
CRIM1 || Cysteine-rich motor neuron 1 || Hs.332847 || R80459 || || 51232 || 308475	1.51522	0.247501
CRISP2 || Cysteine-rich secretory protein 2 || Hs.2042 || AA868278 || || 7180 || 109547	1.34446	1.32401
CRSP9 || Cofactor required for Sp1 transcriptional activation, subunit 9, 33kDa || Hs.279902 || AA459244 || || 9443 || 114658	1.55368	0.704799
CRTAP || Cartilage associated protein || Hs.517888 || AA424951 || || 10491 || 115190	1.79627	0.244054
CRX || Cone-rod homeobox || Hs.249186 || AA701006 || || 1406 || 225195	1.58355	0.364305
CRYBA4 || Crystallin, beta A4 || Hs.57690 || AA449982 || || 1413 || 101606	1.50723	0.542583
CS || Citrate synthase || Hs.430606 || AA608843 || || 1431 || 316182	1.60612	0.326679
CSF3R || Colony stimulating factor 3 receptor (granulocyte) || Hs.524517 || AA458507 || G-CSF receptor || 1441 || 99163	2.12336	0.0990004
CSTF2 || Cleavage stimulation factor, 3' pre-RNA, subunit 2, 64kDa || Hs.549029 || AA291995 || || 1478 || 119805	1.33973	1.16101
CSTF3 || Hypothetical protein LOC283267 || Hs.44402 || AI668631 || || 1479 || 115179	1.36348	0.793728
CTNNBL1 || Catenin, beta like 1 || Hs.472667 || AA487483 || || 56259 || 108274	1.31766	0.94976
CTSB || Cathepsin B || Hs.520898 || W47179 || || 1508 || 108860	1.54463	1.32401
CUBN || Cubilin (intrinsic factor-cobalamin receptor) || Hs.166206 || AA931843 || || 8029 || 102769	2.30934	0.185724
CUEDC2 || CUE domain containing 2 || Hs.500874 || AA015607 || || 79004 || 102373	1.85051	0.247501
CUGBP2 || CUG triplet repeat, RNA binding protein 2 || Hs.309288 || AA233626 || || 10659 || 99761	1.37669	1.68793
CUTL1 || Cut-like 1, CCAAT displacement protein (Drosophila) || Hs.438974 || AA284408 || || 1523 || 111601	1.59583	0.131852
CWF19L1 || CWF19-like 1, cell cycle control (S. pombe) || Hs.215502 || AA988684 || || 55280 || 114278	1.5102	0.451626
CXCL10 || Chemokine (C-X-C motif) ligand 10 || Hs.413924 || AA878880 || || 3627 || 117977	1.44757	0.542583
CXCL14 || Chemokine (C-X-C motif) ligand 14 || Hs.483444 || AI016051 || || 9547 || 309530	1.53658	0.542583
CXorf12 || Chromosome X open reading frame 12 || Hs.23119 || AA455272 || || 8269 || 115189	1.53382	0.244054
CXorf24 || Chromosome X open reading frame 24 || Hs.547841 || AA278227 || || 203414 || 221788	1.44063	0.425188
CXorf34 || Chromosome X open reading frame 34 || Hs.496501 || W39709 || || 79979 || 116698	1.53952	0.326679
CYLC1 || Cylicin, basic protein of sperm head cytoskeleton 1 || Hs.444230 || AA974987 || || 1538 || 309884	1.36555	1.16101
CYLC2 || Cylicin, basic protein of sperm head cytoskeleton 2 || Hs.3232 || AI018066 || || 1539 || 221288	1.33085	1.68793
CYP19A1 || Cytochrome P450, family 19, subfamily A, polypeptide 1 || Hs.511367 || AA628233 || || 1588 || 222325	1.2907	1.07143
CYP2B7P1 || Cytochrome P450, family 2, subfamily B, polypeptide 7 pseudogene 1 || Hs.529117 || AA994287 || || 1556 || 309016	1.28094	1.62173
CYP2D7P1 || Cytochrome P450, family 2, subfamily D, polypeptide 7 pseudogene 1 || Hs.333497 || AI016456 || || 1564 || 309350	1.44325	1.07143
CYP3A5 || Cytochrome P450, family 3, subfamily A, polypeptide 43 || Hs.150276 || AA702706 || || 1577 || 307080	1.40759	1.16101
CYP3A7 || Cytochrome P450, family 3, subfamily A, polypeptide 7 || Hs.111944 || R91077 || || 1551 || 112299	1.89718	0.0990004
CYP7B1 || **Cytochrome P450, family 7, subfamily B, polypeptide 1 || Hs.491869 || AA412491 || || 9420 || 106907	1.41003	0.451626
CYP7B1 || Cytochrome P450, family 7, subfamily B, polypeptide 1 || Hs.491869 || AA992540 || || 9420 || 310225	1.69146	0.131852
CYP8B1 || Cytochrome P450, family 8, subfamily B, polypeptide 1 || Hs.447793 || AA928708 || || 1582 || 317631	1.81995	0
D15Wsu75e || DNA segment, Chr 15, Wayne State University 75, expressed || Hs.335274 || AI347318 || || 27351 || 315832	1.55585	0.185724
D2LIC || Dynein 2 light intermediate chain || Hs.371597 || R23165 || || 51626 || 310286	1.74186	0.131852
DACH2 || Dachshund homolog 2 (Drosophila) || Hs.86603 || AA599142 || || 117154 || 101894	1.58806	0.185724
DAO || D-amino-acid oxidase || Hs.113227 || AA953563 || || 1610 || 109388	1.66908	0.244054
DARS || Aspartyl-tRNA synthetase || Hs.503787 || AI001789 || || 1615 || 310212	1.30829	1.68793
DATF1 || Death associated transcription factor 1 || Hs.551527 || AI142032 || || 11083 || 319069	1.8752	0.131852
DATF1 || Death associated transcription factor 1 || Hs.551527 || AI288192 || || 11083 || 313894	2.06384	0
DCDC2 || Doublecortin domain containing 2 || Hs.512603 || AA127741 || || 51473 || 114244	1.707	0.131852
DCI || Dodecenoyl-Coenzyme A delta isomerase (3,2 trans-enoyl-Coenzyme A isomerase) || Hs.403436 || AA405800 || || 1632 || 102637	1.6266	0.425188
DCP1B || DCP1 decapping enzyme homolog B (S. cerevisiae) || Hs.130934 || AA447726 || || 196513 || 118502	1.61901	0.367894
DCPS || Decapping enzyme, scavenger || Hs.504249 || N35397 || || 28960 || 225777	1.44835	0.326679
DDAH1 || Dimethylarginine dimethylaminohydrolase 1 || Hs.379858 || AA508838 || || 23576 || 114893	1.96569	0.0990004
DDT || D-dopachrome tautomerase || Hs.433902 || AA228813 || || 1652 || 109536	1.65015	0.247501
DDT || D-dopachrome tautomerase || Hs.433902 || AA292995 || || 1652 || 101116	2.10992	0
DDT || D-dopachrome tautomerase || Hs.433902 || AW005215 || || 1652 || 330260	1.52683	1.68793
DDX23 || DEAD (Asp-Glu-Ala-Asp) box polypeptide 23 || Hs.130098 || AA904800 || || 9416 || 310923	1.30293	0.803811
DDX49 || DEAD (Asp-Glu-Ala-Asp) box polypeptide 49 || Hs.143187 || AA843231 || || 54555 || 105265	1.36637	1.32401
DDX50 || DEAD (Asp-Glu-Ala-Asp) box polypeptide 50 || Hs.522984 || AA621324 || || 79009 || 102203	1.41818	1.47707
DECR2 || 2,4-dienoyl CoA reductase 2, peroxisomal || Hs.513233 || AA417227 || || 26063 || 112634	1.92377	0.131852
DEF6 || **Differentially expressed in FDCP 6 homolog (mouse) || Hs.15476 || AA478556 || || 50619 || 99487	1.62249	0.542583
DEPDC4 || DEP domain containing 4 || Hs.250472 || AA904979 || || 120863 || 316718	1.56688	0.244054
DES || Desmin || Hs.471419 || AI972874 || || 1674 || 331129	1.41512	0.803811
DGCR9 || Similar to POM121 membrane glycoprotein-like 1 || Hs.106311 || AI167628 || || 25787 || 311921	1.41508	0.793728
DGKA || Diacylglycerol kinase, alpha 80kDa || Hs.524488 || AA456830 || Diacylglycerol kinase alpha (80kD) || 1606 || 98491	1.38069	1.87613
DHRS3 || Dehydrogenase/reductase (SDR family) member 3 || Hs.289347 || AA865912 || || 9249 || 220939	1.38024	0.542583
DHRSX || Zinc finger, BED domain containing 1 || Hs.458462 || AI123255 || || 207063 || 319766	1.64949	0.185724
DHX29 || DEAH (Asp-Glu-Ala-His) box polypeptide 29 || Hs.444208 || AA907048 || || 54505 || 226595	1.37194	1.16101
DHX30 || DEAH (Asp-Glu-Ala-His) box polypeptide 30 || Hs.517948 || H67761 || || 22907 || 101399	1.36059	1.87613
DIP13B || DIP13 beta || Hs.506603 || R77239 || || 55198 || 112847	1.65135	0.185724
DIRAS1 || DIRAS family, GTP-binding RAS-like 1 || Hs.172753 || AI290779 || || 148252 || 317328	1.40885	1.87613
DISC1 || Disrupted in schizophrenia 1 || Hs.13318 || AA036723 || || 27185 || 225211	1.50512	0.131852
DIXDC1 || DIX domain containing 1 || Hs.116796 || N62375 || || 85458 || 99765	1.43838	0.94976
DKFZP434H132 || DKFZP434H132 protein || Hs.17936 || AA459421 || || 56905 || 115381	1.73616	0.185724
DKFZp434H2215 || Hypothetical protein DKFZp434H2215 || Hs.120369 || AA719238 || || 54752 || 224600	1.34752	1.07143
DKFZP434P1750 || TBC1 domain family, member 10B || Hs.513498 || AA635727 || || 26000 || 113116	1.65635	0.803811
DKFZP564C186 || DKFZP564C186 protein || Hs.335293 || AA026277 || || 26155 || 99418	1.89858	0.185724
DKFZP564G2022 || DKFZP564G2022 protein || Hs.511138 || N63753 || || 25963 || 101753	1.49384	0.451626
DKFZP564O123 || DKFZP564O123 protein || Hs.476930 || N50963 || || 25978 || 105937	1.41706	1.47707
DKFZP566N034 || Hypothetical protein DKFZp566N034 || Hs.369471 || AA127499 || || 81615 || 99008	1.30417	1.68793
DKFZp566O084 || DKFZP566O084 protein || Hs.386989 || AA622809 || || 25979 || 115968	1.35647	0.793728
DKFZp761B107 || Hypothetical protein DKFZp761B107 || Hs.106432 || AA010870 || || 91050 || 119453	1.4335	1.47707
DKFZP761C1711 || **Hypothetical protein DKFZp761C1711 || Hs.503453 || T61899 || || 57796 || 120973	1.44051	1.62173
DKFZP761C1711 || Hypothetical protein DKFZp761C1711 || Hs.503453 || AA180882 || || 57796 || 114136	1.3806	1.16101
DKFZp761I2123 || **Hypothetical protein DKFZp761I2123 || Hs.77978 || AI263023 || || 83637 || 106949	1.81011	0.185724
DKFZp761I2123 || Hypothetical protein DKFZp761I2123 || Hs.77978 || AW072169 || || 83637 || 330865	1.31472	0.803811
DKFZp762F0713 || Hypothetical protein DKFZp762F0713 || Hs.416214 || AA171755 || || 283554 || 119296	1.39006	0.793728
DLG3 || Discs, large homolog 3 (neuroendocrine-dlg, Drosophila) || Hs.522680 || H99215 || || 1741 || 98791	1.38817	0.803811
DLNB14 || Similar to DLNB14 || Hs.534613 || T98662 || || 338657 || 111000	1.4636	0.94976
DMGDH || Dimethylglycine dehydrogenase || Hs.122082 || AI302996 || || 29958 || 312860	1.41718	0.451626
DNAH5 || Dynein, axonemal, heavy polypeptide 5 || Hs.212360 || AA873619 || || 1767 || 120058	1.91911	0.247501
DNAH5 || Dynein, axonemal, heavy polypeptide 5 || Hs.212360 || AI263076 || || 1767 || 110119	1.53793	0.542583
DNAH7 || Dynein, axonemal, heavy polypeptide 7 || Hs.97403 || AA620890 || || 56171 || 106898	1.26868	1.68793
DNAJC1 || DnaJ (Hsp40) homolog, subfamily C, member 1 || Hs.499000 || AA448927 || || 64215 || 119571	1.46864	0.704799
DNCI2 || Dynein, cytoplasmic, intermediate polypeptide 2 || Hs.546250 || N38963 || || 1781 || 106973	1.66046	0.451626
DNMT3B || DNA (cytosine-5-)-methyltransferase 3 beta || Hs.251673 || N39452 || || 1789 || 221973	1.39626	1.68793
DOCK2 || Dedicator of cytokinesis 2 || Hs.325528 || N52799 || || 1794 || 113755	1.45565	0.247501
DOCK5 || Dedicator of cytokinesis 5 || Hs.195403 || AI128661 || || 80005 || 315502	1.78318	0.131852
DOCK8 || Dedicator of cytokinesis 8 || Hs.132599 || AI820521 || || 81704 || 105968	1.66007	0.244054
DOCK9 || Dedicator of cytokinesis 9 || Hs.314413 || AA976413 || || 23348 || 100803	1.91809	0
DOK1 || Docking protein 1, 62kDa (downstream of tyrosine kinase 1) || Hs.103854 || AA142943 || || 1796 || 109766	1.37073	1.32401
DOK2 || Docking protein 2, 56kDa || Hs.71215 || AA133189 || || 9046 || 99643	1.37472	1.68793
DOT1L || DOT1-like, histone H3 methyltransferase (S. cerevisiae) || Hs.465554 || W42996 || || 84444 || 112063	1.34372	1.07143
DPF2 || **D4, zinc and double PHD fingers family 2 || Hs.13495 || AA492293 || || 5977 || 107507	1.35885	1.62173
DPP7 || Dipeptidylpeptidase 7 || Hs.37916 || AI261793 || || 29952 || 107001	1.3828	1.32401
DPYD || Dihydropyrimidine dehydrogenase || Hs.335034 || W49558 || || 1806 || 108217	1.35848	1.68793
DRAP1 || DR1-associated protein 1 (negative cofactor 2 alpha) || Hs.356742 || AA406285 || || 10589 || 119560	1.80468	0.185724
DRCTNNB1A || Down-regulated by Ctnnb1, a || Hs.85603 || AA863470 || || 84668 || 226685	1.61601	0.247501
DRPLA || Atrophin 1 || Hs.143766 || AA490970 || || 1822 || 320089	1.56243	0.131852
DSIPI || TSC22 domain family 3 || Hs.522074 || AA775091 || || 1831 || 117195	1.42092	1.32401
DTX1 || Deltex homolog 1 (Drosophila) || Hs.372152 || T97553 || || 1840 || 103737	1.95725	0.131852
DUSP12 || Dual specificity phosphatase 12 || Hs.416216 || AA421175 || || 11266 || 98428	1.38649	0.793728
DVL2 || Dishevelled, dsh homolog 2 (Drosophila) || Hs.118640 || AA447930 || || 1856 || 114075	1.45323	0.94976
DYM || Dymeclin || Hs.162996 || AI015412 || || 54808 || 308699	1.49977	0.364305
DYRK1A || Dual-specificity tyrosine-(Y)-phosphorylation regulated kinase 1A || Hs.368240 || AA480922 || Unknown UG Hs.104050 ESTs || 1859 || 162456	1.29294	2.01742
E2F1 || E2F transcription factor 1 || Hs.96055 || AA424949 || || 1869 || 105417	2.05882	0
EDAR || Ectodysplasin A receptor || Hs.171971 || AA134978 || || 10913 || 112472	2.24462	0
EDAR || Ectodysplasin A receptor || Hs.171971 || AI017384 || || 10913 || 307349	1.50638	0.247501
EDNRA || Endothelin receptor type A || Hs.183713 || AI088707 || || 1909 || 314290	1.57581	0.185724
EFEMP1 || EGF-containing fibulin-like extracellular matrix protein 1 || Hs.76224 || AA875933 || || 2202 || 98863	2.18583	1.47707
EFNB3 || Ephrin-B3 || Hs.26988 || AA485665 || || 1949 || 103884	1.33226	1.62173
EIF2B4 || Eukaryotic translation initiation factor 2B, subunit 4 delta, 67kDa || Hs.169474 || AI199321 || || 8890 || 311686	1.41115	1.68793
EIF3S3 || Eukaryotic translation initiation factor 3, subunit 3 gamma, 40kDa || Hs.492599 || AA937770 || || 8667 || 115494	1.31203	1.47707
EIF5A || Eukaryotic translation initiation factor 5A || Hs.534314 || AA878570 || || 1984 || 225875	1.4088	1.16101
EIF5A || Eukaryotic translation initiation factor 5A || Hs.534314 || N28521 || Eukaryotic translation initiation factor 5A || 1984 || 244937	1.98291	0.451626
ELA3A || Elastase 3A, pancreatic (protease E) || Hs.471034 || AA845167 || || 10136 || 113684	1.46244	0.803811
ELAC1 || ElaC homolog 1 (E. coli) || Hs.47572 || AA609887 || || 55520 || 99406	1.57455	1.32401
ELAVL2 || ELAV (embryonic lethal, abnormal vision, Drosophila)-like 2 (Hu antigen B) || Hs.166109 || AI821038 || || 1993 || 101987	1.56214	0.131852
ELL || Elongation factor RNA polymerase II || Hs.515260 || AI652901 || || 8178 || 316971	1.37343	1.32401
ELMOD1 || ELMO domain containing 1 || Hs.495779 || AA450352 || || 55531 || 117052	1.29575	1.62173
ELP3 || Elongation protein 3 homolog (S. cerevisiae) || Hs.491336 || AA417592 || || 55140 || 224299	1.49089	0.425188
EPB41L2 || Erythrocyte membrane protein band 4.1-like 2 || Hs.486470 || AA889026 || || 2037 || 222891	1.48984	0.793728
EPB41L3 || **Erythrocyte membrane protein band 4.1-like 3 || Hs.213394 || AA495835 || || 23136 || 112111	1.76322	1.62173
EPB49 || Erythrocyte membrane protein band 4.9 (dematin) || Hs.274122 || N76836 || || 2039 || 103631	1.75882	0
EPC1 || Enhancer of polycomb homolog 1 (Drosophila) || Hs.167805 || AA459697 || || 80314 || 115080	1.74715	0.244054
EPHA1 || EPH receptor A1 || Hs.89839 || N90246 || EPH=receptor tyrosine kinase || 2041 || 117595	1.36471	1.68793
EPHX1 || Hypothetical gene supported by AK124699 || Hs.89649 || AA838691 || || 2052 || 103768	1.40494	0.94976
EPN2 || Epsin 2 || Hs.514728 || AI049978 || || 22905 || 112467	1.32547	1.16101
EPS8L3 || EPS8-like 3 || Hs.485352 || AA134985 || || 79574 || 116131	1.3429	1.68793
ERBB2 || V-erb-b2 erythroblastic leukemia viral oncogene homolog 2, neuro/glioblastoma derived oncogene homolog (avian) || Hs.446352 || AA481939 || || 2064 || 119665	1.35875	1.07143
ERBB4 || V-erb-a erythroblastic leukemia viral oncogene homolog 4 (avian) || Hs.390729 || AA121031 || || 2066 || 109266	1.93506	0
ERBB4 || V-erb-a erythroblastic leukemia viral oncogene homolog 4 (avian) || Hs.390729 || AA665737 || || 2066 || 112602	1.43268	1.32401
ERF || Ets2 repressor factor || Hs.440332 || AA877584 || || 2077 || 114237	1.44146	0.704799
ERF || Ets2 repressor factor || Hs.440332 || AA953055 || || 2077 || 307797	1.47778	0.364305
ERN1 || Endoplasmic reticulum to nucleus signalling 1 || Hs.133982 || AI076928 || || 2081 || 116893	1.74935	0.131852
ESRRA || Estrogen-related receptor alpha || Hs.110849 || AA098886 || || 2101 || 105071	1.68565	0.244054
ETEA || Expressed in T-cells and eosinophils in atopic dermatitis || Hs.484242 || AA052898 || || 23197 || 118049	1.83683	0
ETNK1 || Ethanolamine kinase 1 || Hs.240056 || H56029 || || 55500 || 119345	1.74479	0.185724
ETS1 || V-ets erythroblastosis virus E26 oncogene homolog 1 (avian) || Hs.369438 || AA988302 || || 2113 || 108078	1.29199	2.01742
ETV5 || Ets variant gene 5 (ets-related molecule) || Hs.43697 || AA922954 || || 2119 || 317244	1.45092	0.803811
ETV6 || Ets variant gene 6 (TEL oncogene) || Hs.504765 || N74925 || || 2120 || 98635	1.45345	0.803811
EVE1 || SH3 domain protein D19 || Hs.519018 || AA976599 || || 152503 || 307499	1.4356	0.451626
EVI2A || Ecotropic viral integration site 2A || Hs.113874 || AI186954 || || 2123 || 312821	1.29397	1.62173
EXT1 || Exostoses (multiple) 1 || Hs.492618 || AA132719 || || 2131 || 108614	1.3094	1.68793
F2RL1 || Coagulation factor II (thrombin) receptor-like 1 || Hs.154299 || AI023006 || || 2150 || 317594	1.40456	1.32401
FAAH || Fatty acid amide hydrolase || Hs.528334 || AA877618 || || 2166 || 116157	2.25596	0
FABP4 || Fatty acid binding protein 4, adipocyte || Hs.391561 || N92901 || || 2167 || 106685	1.40036	1.07143
FADS2 || Fatty acid desaturase 2 || Hs.502745 || AI094611 || || 9415 || 314351	1.64007	0.326679
FAM12A || Family with sequence similarity 12, member A || Hs.304757 || AA778629 || || 10876 || 106082	1.27395	1.68793
FAM19A4 || Family with sequence similarity 19 (chemokine (C-C motif)-like), member A4 || Hs.187873 || AA757457 || || 151647 || 222333	1.86152	0.131852
FAM3D || Family with sequence similarity 3, member D || Hs.61265 || AA025433 || || 131177 || 101837	1.40643	1.47707
FAM3D || Family with sequence similarity 3, member D || Hs.61265 || AA470683 || || 131177 || 119495	1.43338	0.793728
FAM50B || Family with sequence similarity 50, member B || Hs.140944 || AI936359 || || 26240 || 331093	1.49508	0.803811
FAM51A1 || Family with sequence similarity 51, member A1 || Hs.528647 || AA444046 || || 54960 || 223521	1.37667	1.87613
FANCC || Fanconi anemia, complementation group C || Hs.494529 || AI280997 || || 2176 || 319423	1.39878	1.87613
FANCG || Fanconi anemia, complementation group G || Hs.434873 || AA427484 || || 2189 || 102987	1.49875	0.94976
FARSLA || Phenylalanine-tRNA synthetase-like, alpha subunit || Hs.23111 || W96450 || || 2193 || 103709	1.52801	0.451626
FARSLB || Phenylalanine-tRNA synthetase-like, beta subunit || Hs.471452 || AA857903 || || 10056 || 98669	1.74063	0.247501
FAT || FAT tumor suppressor homolog 1 (Drosophila) || Hs.481371 || AA126856 || || 2195 || 112899	1.52582	0.247501
FAT2 || FAT tumor suppressor homolog 2 (Drosophila) || Hs.132158 || H10938 || || 2196 || 120856	1.48457	0.131852
FATE1 || Fetal and adult testis expressed 1 || Hs.301960 || AA460295 || || 89885 || 101600	1.47054	0.425188
FBXL17 || F-box and leucine-rich repeat protein 17 || Hs.112143 || AA459692 || || 64839 || 106992	1.58705	0.185724
FBXL4 || F-box and leucine-rich repeat protein 4 || Hs.536850 || AA455537 || || 26235 || 107718	1.57443	0.793728
FBXO25 || F-box protein 25 || Hs.438454 || H14767 || || 26260 || 109036	1.51598	0.803811
FBXO39 || F-box protein 39 || Hs.368364 || AI187213 || || 162517 || 320051	1.46788	0.542583
FBXO6 || F-box protein 6 || Hs.464419 || AA284184 || || 26270 || 104709	1.78989	0.247501
FBXW8 || F-box and WD-40 domain protein 8 || Hs.435466 || AI821450 || || 26259 || 110879	2.56639	0.0990004
FCGR2A || Fc fragment of IgG, low affinity IIa, receptor (CD32) || Hs.352642 || AA634109 || || 2212 || 99423	1.37211	0.704799
FCGR3B || Fc fragment of IgG, low affinity IIIb, receptor (CD16b) || Hs.372679 || AA703460 || || 2215 || 222685	1.34952	0.94976
FCHO2 || FCH domain only 2 || Hs.165762 || H93339 || || 115548 || 107254	2.17061	0
FEZ2 || **Fasciculation and elongation protein zeta 2 (zygin II) || Hs.258563 || N25657 || || 9637 || 117387	1.5702	0.704799
FGD2 || FYVE, RhoGEF and PH domain containing 2 || Hs.509664 || N51107 || || 221472 || 114498	1.5883	0.364305
FGD6 || FYVE, RhoGEF and PH domain containing 6 || Hs.506381 || AA521387 || Unknown UG Hs.177698 ESTs sc_id3309 || 55785 || 185386	1.53158	0.425188
FIP1L1 || FIP1 like 1 (S. cerevisiae) || Hs.518760 || AI017647 || || 81608 || 315091	1.66738	0.185724
FKBP5 || FK506 binding protein 5 || Hs.407190 || AA872767 || || 2289 || 109340	1.29823	2.01742
FLCN || Hypothetical protein MGC13008 || Hs.513975 || AA155574 || || 201163 || 105094	2.0914	0
FLJ00012 || FLJ00012 protein || Hs.21051 || N47009 || || 89849 || 113899	1.29495	1.62173
FLJ10569 || Hypothetical protein FLJ10569 || Hs.512627 || AA195647 || || 55174 || 99074	1.50169	0.326679
FLJ10808 || Hypothetical protein FLJ10808 || Hs.212774 || AA443582 || || 55236 || 117121	1.4573	1.16101
FLJ10884 || Hypothetical protein FLJ10884 || Hs.135693 || AI341793 || || 54596 || 313886	1.31372	1.68793
FLJ10922 || Hypothetical protein FLJ10922 || Hs.351335 || H82874 || || 55260 || 109883	1.66797	0
FLJ10925 || Hypothetical protein FLJ10925 || Hs.533139 || AI024524 || || 55262 || 308633	1.42149	1.07143
FLJ10980 || Hypothetical protein FLJ10980 || Hs.152385 || AI091178 || || 56204 || 311838	1.83439	0.185724
FLJ12476 || Hypothetical protein FLJ12476 || Hs.444535 || AA256332 || || 64799 || 106038	1.6163	0.247501
FLJ12592 || Putative acyl-CoA dehydrogenase || Hs.441378 || H93118 || || 84129 || 105894	1.43087	0.803811
FLJ12671 || Hypothetical protein FLJ12671 || Hs.301904 || AA632434 || || 81875 || 112557	1.4925	0.247501
FLJ12788 || **Hypothetical protein FLJ12788 || Hs.516122 || AI061317 || || 64427 || 110263	1.48317	1.07143
FLJ13910 || Hypothetical protein FLJ13910 || Hs.75277 || AI968431 || || 64795 || 330662	1.42495	0.542583
FLJ14082 || Hypothetical protein FLJ14082 || Hs.469316 || H96629 || || 80092 || 101038	1.57789	0.542583
FLJ14213 || Hypothetical protein FLJ14213 || Hs.19987 || AA573376 || || 79899 || 98756	1.36655	0.793728
FLJ14525 || Hypothetical protein FLJ14525 || Hs.520494 || N59373 || || 84886 || 103146	1.60118	0.247501
FLJ14627 || Hypothetical protein FLJ14627 || Hs.437195 || N62986 || || 84900 || 222999	1.63894	0.247501
FLJ14640 || Hypothetical protein FLJ14640 || Hs.317590 || AI312718 || || 84902 || 316799	1.41243	1.07143
FLJ14936 || Hypothetical protein FLJ14936 || Hs.5301 || T58434 || || 84950 || 104713	1.44624	1.07143
FLJ20010 || Hypothetical protein FLJ20010 || Hs.91816 || AA447995 || || 54494 || 119523	1.50254	0.367894
FLJ20032 || Hypothetical protein FLJ20032 || Hs.367639 || T67026 || || 54790 || 111324	1.49768	0.542583
FLJ20203 || **Hypothetical protein FLJ20203 || Hs.516775 || N25240 || || 54856 || 100731	1.72331	0.131852
FLJ20254 || Hypothetical protein FLJ20254 || Hs.533934 || AA486370 || || 54867 || 108440	1.42916	1.47707
FLJ20294 || **Hypothetical protein FLJ20294 || Hs.546404 || AA570295 || || 55626 || 107996	1.37586	0.793728
FLJ20344 || Hypothetical protein FLJ20344 || Hs.444269 || N30728 || || 55634 || 98524	1.37154	0.542583
FLJ20519 || Hypothetical protein FLJ20519 || Hs.549171 || AA878210 || || 54964 || 226322	1.67674	0.326679
FLJ20581 || Hypothetical protein FLJ20581 || Hs.122939 || AA769662 || || 54988 || 114511	1.89146	0
FLJ20753 || Hypothetical protein FLJ20753 || Hs.202542 || AA398274 || || 55036 || 106748	2.21387	0
FLJ20972 || Hypothetical protein FLJ20972 || Hs.473495 || AI025472 || || 80098 || 223089	1.39464	1.87613
FLJ21415 || Hypothetical protein FLJ21415 || Hs.528681 || AA709027 || || 79794 || 220409	1.45377	0.364305
FLJ21616 || Hypothetical protein FLJ21616 || Hs.194225 || AA454840 || || 79618 || 116621	1.53686	0.425188
FLJ21839 || Hypothetical protein FLJ21839 || Hs.138207 || AA040649 || || 60509 || 225142	1.65628	0.185724
FLJ21919 || Hypothetical protein FLJ21919 || Hs.516522 || AA504514 || || 65123 || 309667	1.57033	0.326679
FLJ22582 || BAI1-associated protein 2-like 2 || Hs.474822 || AA570148 || || 80115 || 116754	2.12977	0
FLJ23033 || Hypothetical protein FLJ23033 || Hs.445826 || AA626351 || || 79739 || 226565	1.4907	0.131852
FLJ23129 || Hypothetical protein FLJ23129 || Hs.49421 || AA961236 || || 79819 || 318675	1.5429	1.68793
FLJ23221 || Hypothetical protein FLJ23221 || Hs.91283 || R07618 || || 79630 || 99470	1.3684	1.32401
FLJ23441 || Hypothetical protein FLJ23441 || Hs.503389 || AI014965 || || 79731 || 307813	1.7032	0.247501
FLJ23878 || Hypothetical protein FLJ23878 || Hs.194609 || N47989 || || 200172 || 110495	1.49127	0.542583
FLJ25471 || Hypothetical protein FLJ25471 || Hs.444882 || W72724 || || 137902 || 108433	1.40752	0.704799
FLJ25756 || Hypothetical protein FLJ25756 || Hs.130957 || AI015076 || || 283659 || 308173	1.55162	1.07143
FLJ30851 || FLJ30851 protein || Hs.467868 || AA625774 || || 375190 || 223087	1.49827	0.185724
FLJ30851 || FLJ30851 protein || Hs.467868 || AA906368 || || 375190 || 310934	1.40511	0.704799
FLJ31052 || Fc receptor like 2 || Hs.517422 || AA746047 || || 127943 || 106639	1.98315	0.247501
FLJ31164 || Hypothetical protein FLJ31164 || Hs.370931 || AA423823 || || 203062 || 222789	1.37279	0.451626
FLJ31842 || Hypothetical protein FLJ31842 || Hs.483512 || AA961117 || || 148534 || 308666	1.89243	0.185724
FLJ32191 || Zinc finger protein 420 || Hs.444992 || AA453441 || || 147923 || 98395	1.3569	1.47707
FLJ32569 || Hypothetical protein FLJ32569 || Hs.177744 || AA419488 || Unknown UG Hs.177744 ESTs sc_id1471 || 148811 || 185982	1.44093	1.07143
FLJ32731 || Hypothetical protein FLJ32731 || Hs.191320 || R71481 || || 138050 || 111391	1.89366	0.185724
FLJ32884 || Hypothetical protein FLJ32884 || Hs.491734 || AA071005 || || 149499 || 310246	1.3516	1.32401
FLJ33768 || Hypothetical protein FLJ33768 || Hs.177927 || AA412498 || || 283673 || 100567	1.79086	0.185724
FLJ34077 || Weakly similar to zinc finger protein 195 || Hs.538374 || AA022645 || || 404033 || 102897	1.28054	1.32401
FLJ35801 || Hypothetical protein FLJ35801 || Hs.550549 || AI023837 || || 150291 || 310574	1.55703	0.185724
FLJ35976 || Hypothetical protein FLJ35976 || Hs.131810 || AI022625 || || 284618 || 308715	1.36724	1.47707
FLJ36888 || Hypothetical protein FLJ36888 || Hs.103845 || AA521448 || || 126526 || 225821	1.40339	1.07143
FLJ37659 || Hypothetical protein FLJ37659 || Hs.110069 || AA609774 || || 286499 || 105674	1.32686	1.87613
FLJ38736 || **Hypothetical protein FLJ38736 || Hs.208067 || AA923056 || || 256764 || 117401	1.91903	0.542583
FLJ38819 || Harmonin-interacting ankyrin-repeat containing protein || Hs.115959 || AA568220 || || 257629 || 109011	1.66304	0.185724
FLJ39378 || Hypothetical protein FLJ39378 || Hs.530315 || AA602976 || || 353116 || 99288	1.50822	0.451626
FLJ39582 || Hypothetical LOC439931 || Hs.517430 || AA425384 || || 439931 || 100148	1.47283	0.542583
FLJ40243 || Hypothetical protein FLJ40243 || Hs.97714 || AA431430 || || 133558 || 114929	1.44666	0.244054
FLJ40852 || Hypothetical protein FLJ40852 || Hs.17589 || AI668585 || || 285962 || 106375	1.33889	0.94976
FLJ42289 || FLJ42289 protein || Hs.136982 || AI302392 || || 388182 || 313688	1.35352	1.62173
FLJ44299 || FLJ44299 protein || Hs.125713 || AA885104 || || 339145 || 314630	1.37665	0.94976
FLJ44796 || FLJ44796 protein || Hs.34198 || AA195086 || || 401209 || 106192	1.34158	1.32401
FLJ45455 || FLJ45455 protein || Hs.441035 || AA460977 || || 388336 || 112354	1.40056	0.326679
FLJ46385 || FLJ46385 protein || Hs.444446 || AA136968 || || 390963 || 108558	1.50979	1.07143
FLJ46675 || FLJ46675 protein || Hs.367649 || W69996 || || 146754 || 225596	1.33435	1.16101
FLJ90650 || Laeverin || Hs.98288 || AA418273 || || 206338 || 111042	1.83541	0.131852
FLJ90652 || Hypothetical protein FLJ90652 || Hs.434864 || H59787 || || 283899 || 117494	1.46841	0.425188
FLN29 || FLN29 gene product || Hs.5148 || AI051673 || || 10906 || 161257	1.41541	1.32401
FLRT1 || Fibronectin leucine rich transmembrane protein 1 || Hs.550507 || R42622 || || 23769 || 114176	1.5397	0.247501
FLT1 || Fms-related tyrosine kinase 1 (vascular endothelial growth factor/vascular permeability factor receptor) || Hs.507621 || AA421341 || || 2321 || 225427	1.44295	0.244054
FLT4 || Fms-related tyrosine kinase 4 || Hs.415048 || N59553 || || 2324 || 105342	1.38263	1.07143
FOXI1 || Forkhead box I1 || Hs.87236 || AA741219 || || 2299 || 108279	2.3047	0
FOXP1 || Forkhead box P1 || Hs.431498 || AI018464 || || 27086 || 307627	1.31361	1.62173
FRMD4B || FERM domain containing 4B || Hs.371681 || R71035 || || 23150 || 309898	2.59846	0
FSCN3 || Fascin homolog 3, actin-bundling protein, testicular (Strongylocentrotus purpuratus) || Hs.128402 || AA974905 || || 29999 || 114322	1.90942	0
FSTL3 || **Follistatin-like 3 (secreted glycoprotein) || Hs.529038 || AA417274 || || 10272 || 224633	1.33237	1.16101
FTCD || Formiminotransferase cyclodeaminase || Hs.415846 || N74650 || || 10841 || 109258	1.57452	0.425188
FTH1 || Ferritin, heavy polypeptide 1 || Hs.448738 || N71795 || || 2495 || 310105	1.41277	1.62173
FTL || Ferritin, light polypeptide || Hs.433670 || AA971188 || || 2512 || 108914	1.65044	0.704799
FUT10 || Fucosyltransferase 10 (alpha (1,3) fucosyltransferase) || Hs.458713 || AI147738 || || 84750 || 314915	1.47154	0.94976
FUT8 || Fucosyltransferase 8 (alpha (1,6) fucosyltransferase) || Hs.118722 || AI034360 || || 2530 || 315560	1.86207	0
FXYD1 || FXYD domain containing ion transport regulator 1 (phospholemman) || Hs.442498 || H57136 || || 5348 || 104972	1.58091	0.244054
FXYD3 || FXYD domain containing ion transport regulator 3 || Hs.301350 || AI371056 || || 5349 || 312282	1.52631	0.425188
GAB2 || GRB2-associated binding protein 2 || Hs.429434 || AA622729 || || 9846 || 98800	1.58903	0.364305
GAD2 || Glutamate decarboxylase 2 (pancreatic islets and brain, 65kDa) || Hs.231829 || N34329 || || 2572 || 240426	1.3775	0.94976
GAL3ST3 || Galactose-3-O-sulfotransferase 3 || Hs.208343 || R14066 || || 89792 || 115284	1.51426	0.185724
GAP43 || Growth associated protein 43 || Hs.134974 || AI094575 || || 2596 || 311663	1.71812	0.367894
GARNL3 || GTPase activating Rap/RanGAP domain-like 3 || Hs.29304 || AA233552 || || 84253 || 110026	1.30283	1.68793
GARP || Leucine rich repeat containing 32 || Hs.151641 || AI922402 || || 2615 || 331235	1.72449	0.185724
GATA2 || GATA binding protein 2 || Hs.367725 || AA528191 || || 2624 || 105299	2.25812	0
GATA3 || GATA binding protein 3 || Hs.524134 || R31441 || GATA-3=T-cell specific transcription factor || 2625 || 101778	1.4797	1.62173
GATM || Glycine amidinotransferase (L-arginine:glycine amidinotransferase) || Hs.75335 || AI300834 || || 2628 || 317184	1.9042	0
GBA2 || Glucosidase, beta (bile acid) 2 || Hs.443134 || AA459721 || || 57704 || 118331	1.54789	0.364305
GBP1 || Guanylate binding protein 1, interferon-inducible, 67kDa || Hs.62661 || AI275489 || || 2633 || 314243	1.55802	0.185724
GCAT || Glycine C-acetyltransferase (2-amino-3-ketobutyrate coenzyme A ligase) || Hs.54609 || N93695 || || 23464 || 109212	1.47809	0.185724
GCHFR || GTP cyclohydrolase I feedback regulator || Hs.530792 || AA074446 || || 2644 || 116046	1.5741	0.425188
GCNT1 || **Glucosaminyl (N-acetyl) transferase 1, core 2 (beta-1,6-N-acetylglucosaminyltransferase) || Hs.521568 || AA620472 || || 2650 || 115925	1.72762	0.0990004
GCNT2 || **Glucosaminyl (N-acetyl) transferase 2, I-branching enzyme || Hs.519884 || AA553879 || || 2651 || 111254	2.23229	0
GCS1 || Glucosidase I || Hs.516119 || AA291490 || || 7841 || 110355	1.80636	0.185724
GDDR || Down-regulated in gastric cancer GDDR || Hs.16757 || AI140949 || || 200504 || 316560	1.2781	1.87613
GFAP || Glial fibrillary acidic protein || Hs.514227 || AA069414 || || 2670 || 104701	1.77615	0.185724
GJB3 || Gap junction protein, beta 3, 31kDa (connexin 31) || Hs.522561 || AI225111 || || 2707 || 311988	1.44873	1.68793
GJC1 || Gap junction protein, chi 1, 31.9kDa (connexin 31.9) || Hs.444663 || AA707117 || || 125111 || 221319	1.4763	0.542583
GK || Glycerol kinase || Hs.1466 || AI247948 || || 2710 || 310962	1.46576	0.425188
GLP1R || Glucagon-like peptide 1 receptor || Hs.389103 || AI911512 || || 2740 || 330638	1.97325	0
GLT28D1 || Glycosyltransferase 28 domain containing 1 || Hs.110853 || AI142824 || || 55849 || 311858	1.26062	1.68793
GLYAT || Glycine-N-acyltransferase || Hs.145384 || AA704995 || || 10249 || 100980	1.49764	0.244054
GMDS || GDP-mannose 4,6-dehydratase || Hs.144496 || AA506344 || || 2762 || 109780	1.76439	0.131852
GNL1 || Guanine nucleotide binding protein-like 1 || Hs.83147 || N30302 || || 2794 || 105102	1.54912	0.704799
GNRHR2 || Gonadotropin-releasing hormone (type 2) receptor 2 || Hs.356873 || AA903415 || || 114814 || 310048	1.71051	0.0990004
GPATC1 || G patch domain containing 1 || Hs.466436 || AA046509 || || 55094 || 98997	1.31268	1.47707
GPATC2 || G patch domain containing 2 || Hs.420757 || AA931761 || || 55105 || 310744	1.42972	1.62173
GPATC4 || G patch domain containing 4 || Hs.193832 || AI301631 || || 54865 || 316037	1.69707	0.247501
GPR107 || G protein-coupled receptor 107 || Hs.512461 || AA633232 || || 57720 || 99048	1.89663	0.131852
GPR115 || G protein-coupled receptor 115 || Hs.150131 || AI299961 || || 221393 || 312804	1.97261	0
GPR133 || G protein-coupled receptor 133 || Hs.435168 || AI014683 || || 283383 || 310579	1.76933	0.131852
GPR156 || G protein-coupled receptor 156 || Hs.333358 || AI205578 || || 165829 || 313156	1.73208	0
GPR35 || G protein-coupled receptor 35 || Hs.239891 || AA515711 || || 2859 || 109403	2.45555	0
GPX3 || Glutathione peroxidase 3 (plasma) || Hs.386793 || AA664180 || || 2878 || 108603	2.50857	0
GRIM19 || Cell death-regulatory protein GRIM19 || Hs.534453 || AI245100 || || 51079 || 312978	1.54066	0.803811
GRIM19 || Cell death-regulatory protein GRIM19 || Hs.534453 || W44860 || || 51079 || 103356	1.43323	1.62173
GRK5 || G protein-coupled receptor kinase 5 || Hs.524625 || AA476915 || || 2869 || 104500	1.76935	0.0990004
GRM2 || Glutamate receptor, metabotropic 2 || Hs.121510 || R19103 || || 2912 || 99598	1.39162	1.62173
GRM3 || Glutamate receptor, metabotropic 3 || Hs.112621 || AA937135 || || 2913 || 102766	1.37288	0.803811
GRN || Granulin || Hs.514220 || AA496452 || || 2896 || 106935	1.52346	1.87613
GSTM2 || Glutathione S-transferase M2 (muscle) || Hs.279837 || AA290737 || Glutathione S-transferase subunit 4 (EC 2.5.1.18) || 2946 || 106139	1.45844	1.87613
GSTO2 || Glutathione S-transferase omega 2 || Hs.203634 || AI077645 || || 119391 || 318713	1.46598	0.94976
GTF2E2 || **General transcription factor IIE, polypeptide 2, beta 34kDa || Hs.77100 || N58488 || TFIIE-beta=Transcription initiation factor IIE beta subunit || 2961 || 111380	1.88415	0
GTF2H5 || General transcription factor IIH, polypeptide 5 || Hs.356224 || AA224824 || || 404672 || 116800	1.9828	0.0990004
GTPBP6 || GTP binding protein 6 (putative) || Hs.437145 || AA425013 || || 8225 || 119758	1.32075	1.87613
GULP1 || GULP, engulfment adaptor PTB domain containing 1 || Hs.470887 || R09746 || || 51454 || 100565	1.34924	1.07143
GYPC || Glycophorin C (Gerbich blood group) || Hs.59138 || AA005115 || || 2995 || 117670	1.28195	1.47707
H2AFB3 || H2A histone family, member B3 || Hs.534498 || AA703660 || || 83740 || 106183	1.4758	0.244054
HA-1 || Minor histocompatibility antigen HA-1 || Hs.465521 || AI004920 || || 23526 || 307149	1.47502	1.68793
HA-1 || Minor histocompatibility antigen HA-1 || Hs.465521 || AI122841 || || 23526 || 317473	1.40514	1.16101
HAO2 || Hydroxyacid oxidase 2 (long chain) || Hs.356368 || AA969532 || || 51179 || 119526	1.89269	0.131852
HBXIP || Hepatitis B virus x interacting protein || Hs.439815 || AI218994 || || 10542 || 313906	1.56434	0.367894
HCG18 || HLA complex group 18 || Hs.301985 || AA534674 || || 414777 || 113721	1.83364	0.131852
HCLS1 || Hematopoietic cell-specific Lyn substrate 1 || Hs.14601 || N32012 || HS1= hematopoietic lineage cell specific protein = homologue || 3059 || 120414	1.76207	0.131852
HCMOGT-1 || **Sperm antigen HCMOGT-1 || Hs.431045 || AA598747 || || 92521 || 115414	1.90519	0
HDAC11 || Histone deacetylase 11 || Hs.404802 || AA628093 || || 79885 || 101977	2.64936	0
HDHD1A || Haloacid dehalogenase-like hydrolase domain containing 1A || Hs.185910 || AA634265 || || 8226 || 101991	2.52074	0
HDHD3 || Haloacid dehalogenase-like hydrolase domain containing 3 || Hs.7739 || AA456595 || || 81932 || 100263	1.37756	1.68793
HES1 || Hairy and enhancer of split 1, (Drosophila) || Hs.250666 || AA459983 || || 3280 || 110532	1.55624	0.793728
HES2 || Hairy and enhancer of split 2 (Drosophila) || Hs.118727 || AI676132 || || 54626 || 319064	1.36889	1.16101
HEYL || Hairy/enhancer-of-split related with YRPW motif-like || Hs.472566 || AA969508 || || 26508 || 225143	1.69845	0.326679
HHIP || Hedgehog interacting protein || Hs.507991 || AI821409 || || 64399 || 98462	1.56809	0.326679
HIS1 || HMBA-inducible || Hs.15299 || AI092623 || || 10614 || 319577	1.82531	0.185724
HIST1H2BD || Histone 1, H2bd || Hs.130853 || AI972946 || || 3017 || 330845	2.22039	0
HIST1H2BD || Histone 1, H2bd || Hs.130853 || N33927 || || 3017 || 104357	1.3625	1.87613
HIST1H4H || Histone 1, H4h || Hs.421737 || AI089974 || || 8365 || 315391	1.38805	0.94976
HIST3H2A || Histone 3, H2a || Hs.26331 || AA457566 || || 92815 || 100198	1.68538	0.131852
HKR2 || GLI-Kruppel family member HKR2 || Hs.388162 || AA936133 || || 342945 || 317583	2.32575	0
HLA-DQB1 || Major histocompatibility complex, class II, DQ beta 1 || Hs.409934 || AA458472 || || 3119 || 99303	1.35347	1.32401
HLA-DRB1 || Major histocompatibility complex, class II, DR beta 4 || Hs.520049 || H52245 || MHC Class II=DR beta || 3123 || 101316	1.50586	0.247501
HLA-DRB5 || Major histocompatibility complex, class II, DR beta 4 || Hs.534322 || AA630549 || || 3127 || 308099	1.38185	0.704799
HMGCS2 || 3-hydroxy-3-methylglutaryl-Coenzyme A synthase 2 (mitochondrial) || Hs.59889 || AA496148 || || 3158 || 99140	1.40682	0.803811
HNRPL || Heterogeneous nuclear ribonucleoprotein L || Hs.446623 || AA937108 || || 3191 || 111314	1.33423	1.68793
HNRPR || Heterogeneous nuclear ribonucleoprotein R || Hs.373763 || AA947360 || || 10236 || 108782	1.39394	1.68793
HOXA13 || Homeo box A13 || Hs.414467 || R33638 || || 3209 || 307300	1.49567	0.364305
HOXB13 || Homeo box B13 || Hs.66731 || AA635855 || || 10481 || 120376	2.03728	0
HP1-BP74 || HP1-BP74 || Hs.142442 || AA664265 || || 50809 || 224710	1.69828	0.326679
HPSE || Heparanase || Hs.44227 || N32056 || || 10855 || 117766	1.39182	1.32401
HSPC159 || HSPC159 protein || Hs.372208 || AA486345 || || 29094 || 120911	1.51061	0.185724
HSPC196 || Hypothetical protein HSPC196 || Hs.406530 || AI097052 || || 51524 || 314798	1.8153	0.131852
HSPD1 || Heat shock 60kDa protein 1 (chaperonin) || Hs.113684 || AA879073 || || 3329 || 105056	1.5699	0.244054
HT001 || HT001 protein || Hs.100878 || AA454227 || || 28990 || 111495	1.60035	0.131852
HTR2B || 5-hydroxytryptamine (serotonin) receptor 2B || Hs.421649 || N36174 || || 3357 || 104750	2.07203	0
HUNK || Hormonally upregulated Neu-associated kinase || Hs.109437 || T58129 || || 30811 || 120043	1.37509	2.01742
HXMA || **Xenobiotic/medium-chain fatty acid:CoA ligase || Hs.454660 || AA876291 || || 348158 || 113342	1.68505	0.425188
IBRDC1 || IBR domain containing 1 || Hs.368639 || AA047543 || || 154214 || 108886	1.57671	0.185724
ICA1 || Islet cell autoantigen 1, 69kDa || Hs.487561 || AA482169 || || 3382 || 101997	1.46413	0.94976
ICAM1 || Intercellular adhesion molecule 1 (CD54), human rhinovirus receptor || Hs.515126 || N92072 || CD54=ICAM-1 || 3383 || 178047	1.31676	1.87613
IDH3A || Isocitrate dehydrogenase 3 (NAD+) alpha || Hs.250616 || AA961078 || || 3419 || 308442	1.67802	0.247501
IDI2 || Isopentenyl-diphosphate delta isomerase 2 || Hs.9270 || R42713 || || 91734 || 119042	1.55215	0.364305
IFNG || Interferon, gamma || Hs.856 || AA969504 || || 3458 || 223208	1.29853	2.01742
IGFBP5 || Insulin-like growth factor binding protein 5 || Hs.369982 || AA054451 || || 3488 || 110120	2.14475	0.704799
IGH@ || Immunoglobulin heavy constant gamma 2 (G2m marker) || Hs.510635 || N92646 || GM-CSF receptor alpha chain and Immunoglobulin gamma 3 heavy || 3492 || 105637	1.94958	0.0990004
IGSF4 || Immunoglobulin superfamily, member 4 || Hs.370510 || AI982528 || || 23705 || 330975	1.37686	1.87613
IHPK3 || Inositol hexaphosphate kinase 3 || Hs.17253 || N52903 || || 117283 || 104316	1.31849	1.68793
IL17RB || Interleukin 17 receptor B || Hs.136338 || AA962325 || || 55540 || 100046	1.87877	0.185724
IL23A || Interleukin 23, alpha subunit p19 || Hs.98309 || AA418747 || || 51561 || 112528	2.1644	0
IL24 || Interleukin 24 || Hs.411311 || AA281635 || MDA-7=melanoma differentiation-associated 7=anti-proliferati || 11009 || 98822	1.86432	0
IL2RA || Interleukin 2 receptor, alpha || Hs.231367 || AA903183 || || 3559 || 221813	1.73401	0
IL7 || Interleukin 7 || Hs.536926 || AI539460 || || 3574 || 319943	1.82043	1.16101
ILDR1 || Immunoglobulin-like domain containing receptor 1 || Hs.98484 || AA424839 || || 286676 || 102550	1.48888	0.704799
IMAGE3451454 || SVAP1 protein || Hs.325081 || AA975680 || || 116841 || 220834	1.3959	0.94976
IMP-2 || IGF-II mRNA-binding protein 2 || Hs.35354 || AA634300 || || 10644 || 222719	1.34758	1.87613
INO80 || Homolog of yeast INO80 || Hs.292949 || AI095130 || || 54617 || 312622	1.55342	0.244054
INPP5B || Inositol polyphosphate-5-phosphatase, 75kDa || Hs.449942 || AI668668 || || 3633 || 114894	1.41016	0.542583
INS || Insulin || Hs.89832 || AI685081 || || 3630 || 330548	1.46567	0.793728
INSL3 || Insulin-like 3 (Leydig cell) || Hs.37062 || AI654942 || || 3640 || 312963	1.35966	0.793728
INSR || Insulin receptor || Hs.465744 || AA773311 || || 3643 || 119037	1.9514	0
IQCE || IQ motif containing E || Hs.520627 || N35393 || || 23288 || 225669	1.56064	0.367894
IQCF3 || IQ motif containing F3 || Hs.254808 || AA394104 || || 401067 || 116628	1.72833	0.185724
IQSEC1 || IQ motif and Sec7 domain 1 || Hs.475506 || AA418726 || || 9922 || 115478	1.33169	1.87613
IQWD1 || Glycine cleavage system protein H (aminomethyl carrier) || Hs.435741 || AA004274 || || 55827 || 105429	1.29342	1.32401
IRF6 || Interferon regulatory factor 6 || Hs.355827 || AA043343 || IRF-6=interferon regulatory factor-6 || 3664 || 178454	1.88704	0.0990004
ISG20 || Interferon stimulated gene 20kDa || Hs.459265 || AA503824 || || 3669 || 111623	2.0515	0
ITGA2 || Integrin, alpha 2 (CD49B, alpha 2 subunit of VLA-2 receptor) || Hs.482077 || AA918141 || || 3673 || 105865	1.32477	1.32401
ITGA2 || Integrin, alpha 2 (CD49B, alpha 2 subunit of VLA-2 receptor) || Hs.482077 || AI274123 || || 3673 || 314754	2.02037	0
ITGAE || Integrin, alpha E (antigen CD103, human mucosal lymphocyte antigen 1; alpha polypeptide) || Hs.513867 || AA425451 || || 3682 || 109414	1.47989	0.94976
ITGAM || Integrin, alpha M (complement component receptor 3, alpha; also known as CD11b (p170), macrophage antigen alpha polypeptide) || Hs.172631 || AA436187 || Integrin, alpha M (complement component receptor 3, alpha; a || 3684 || 100778	1.40361	0.704799
ITGB3 || Integrin, beta 3 (platelet glycoprotein IIIa, antigen CD61) || Hs.218040 || AA037229 || Integrin, beta 3 (platelet glycoprotein IIIa, antigen CD61) || 3690 || 118709	1.81459	0.247501
ITIH4 || Inter-alpha (globulin) inhibitor H4 (plasma Kallikrein-sensitive glycoprotein) || Hs.518000 || N73625 || || 3700 || 110356	1.47104	0.367894
ITM1 || Integral membrane protein 1 || Hs.504237 || R68805 || || 3703 || 101557	1.59933	0.367894
ITPKC || Inositol 1,4,5-trisphosphate 3-kinase C || Hs.515415 || N46828 || || 80271 || 108830	1.81457	0.247501
JAK1 || Janus kinase 1 (a protein tyrosine kinase) || Hs.551505 || AI492016 || Unknown UG Hs.170908 EST || 3716 || 192039	1.88028	0.131852
JAK3 || Janus kinase 3 (a protein tyrosine kinase, leukocyte) || Hs.515247 || AA490900 || || 3718 || 222669	1.48074	0.704799
JMJD2B || Jumonji domain containing 2B || Hs.371013 || AI016057 || || 23030 || 308811	1.31574	0.803811
JMJD2C || Jumonji domain containing 2C || Hs.157106 || AI288592 || || 23081 || 311072	1.48953	1.16101
JPH2 || Junctophilin 2 || Hs.441737 || AI452900 || || 57158 || 330334	1.76632	0
JTB || Jumping translocation breakpoint || Hs.6396 || AI015527 || || 10899 || 310288	1.57731	0.803811
JUND || Jun D proto-oncogene || Hs.2780 || AA418670 || || 3727 || 99619	1.65703	0.803811
JUND || Jun D proto-oncogene || Hs.2780 || N66278 || || 3727 || 110798	1.75386	0.367894
KCMF1 || Potassium channel modulatory factor 1 || Hs.345694 || AA125748 || || 56888 || 108790	1.38216	0.94976
KCNA5 || Potassium voltage-gated channel, shaker-related subfamily, member 5 || Hs.150208 || AA975384 || || 3741 || 223025	1.41504	0.94976
KCNAB1 || Potassium voltage-gated channel, shaker-related subfamily, beta member 1 || Hs.157818 || AA776243 || || 7881 || 118431	1.6253	0.131852
KCNAB2 || Potassium voltage-gated channel, shaker-related subfamily, beta member 2 || Hs.440497 || AI654215 || || 8514 || 311455	1.87016	0.131852
KCNB1 || Potassium voltage-gated channel, Shab-related subfamily, member 1 || Hs.84244 || AA069746 || || 3745 || 116939	1.62951	0.364305
KCNC2 || Potassium voltage-gated channel, Shaw-related subfamily, member 2 || Hs.27214 || AA954569 || || 3747 || 308119	1.59897	1.47707
KCND2 || Potassium voltage-gated channel, Shal-related subfamily, member 2 || Hs.21703 || R15779 || || 3751 || 106880	1.40952	0.793728
KCND3 || Potassium voltage-gated channel, Shal-related subfamily, member 3 || Hs.414110 || AA626279 || || 3752 || 222826	1.2948	1.47707
KCNE3 || Potassium voltage-gated channel, Isk-related family, member 3 || Hs.523899 || AI017405 || || 10008 || 223617	1.36497	0.364305
KCNJ10 || Potassium inwardly-rectifying channel, subfamily J, member 10 || Hs.408960 || AI160757 || || 3766 || 315345	2.01756	0.0990004
KCNK4 || Potassium channel, subfamily K, member 4 || Hs.97174 || AA927439 || || 50801 || 309877	1.33442	1.62173
KCNMB4 || Potassium large conductance calcium-activated channel, subfamily M, beta member 4 || Hs.525529 || H16815 || || 27345 || 220401	1.42347	1.16101
KCNN2 || Potassium intermediate/small conductance calcium-activated channel, subfamily N, member 2 || Hs.98280 || AA418000 || || 3781 || 108523	1.32127	1.07143
KCNN4 || Potassium intermediate/small conductance calcium-activated channel, subfamily N, member 4 || Hs.10082 || AA443903 || || 3783 || 100967	1.53754	0.326679
KCNQ3 || Potassium voltage-gated channel, KQT-like subfamily, member 3 || Hs.374023 || AI093325 || || 3786 || 313149	2.119	0
KCNU1 || Potassium channel, subfamily U, member 1 || Hs.13861 || AI005321 || || 157855 || 223354	1.40778	0.793728
KCTD7 || Potassium channel tetramerisation domain containing 7 || Hs.520914 || AA455041 || || 154881 || 110522	1.6109	0.244054
KIAA0146 || KIAA0146 protein || Hs.381058 || AA401448 || || 23514 || 105225	1.54436	0.542583
KIAA0232 || KIAA0232 gene product || Hs.79276 || T97909 || || 9778 || 111597	1.52442	0.542583
KIAA0240 || KIAA0240 || Hs.485426 || AA394210 || || 23506 || 310521	1.29165	1.68793
KIAA0240 || KIAA0240 || Hs.485426 || N51260 || || 23506 || 102686	1.29843	1.62173
KIAA0258 || KIAA0258 || Hs.47313 || AA856600 || || 9827 || 112238	1.42312	0.704799
KIAA0318 || RIM binding protein 2 || Hs.225014 || N93214 || || 23504 || 109249	1.89591	0
KIAA0319 || KIAA0319 || Hs.26441 || AI479408 || || 9856 || 330640	2.21503	0
KIAA0376 || KIAA0376 protein || Hs.474384 || AA773104 || || 23384 || 223267	1.44399	0.704799
KIAA0377 || KIAA0377 gene product || Hs.156814 || AI352369 || || 9677 || 319864	2.39834	0
KIAA0420 || KIAA0420 gene product || Hs.512856 || H42894 || || 9717 || 113106	1.56095	0.425188
KIAA0446 || KIAA0446 gene product || Hs.532375 || AI361616 || || 9673 || 308751	1.32444	1.68793
KIAA0553 || KIAA0553 protein || Hs.463129 || H93278 || || 23131 || 308213	1.41908	0.803811
KIAA0672 || KIAA0672 gene product || Hs.499758 || AI264356 || || 9912 || 319516	1.46643	0.704799
KIAA0674 || KIAA0674 || Hs.522351 || AI273681 || || 23307 || 315813	1.67495	0.244054
KIAA0674 || KIAA0674 || Hs.522351 || AI302216 || || 23307 || 311109	1.72086	0.185724
KIAA0767 || KIAA0767 protein || Hs.475150 || AI680609 || || 23151 || 317800	1.64425	0.185724
KIAA0773 || KIAA0773 gene product || Hs.135343 || AA535784 || || 9715 || 108422	1.99479	0
KIAA0802 || KIAA0802 || Hs.464563 || AA961643 || || 23255 || 112695	1.3601	1.16101
KIAA0888 || KIAA0888 protein || Hs.91662 || N52136 || || 26049 || 111215	1.49589	0.704799
KIAA0960 || KIAA0960 protein || Hs.120855 || AA425295 || || 23249 || 106718	1.62772	0.185724
KIAA0971 || KIAA0971 || Hs.84429 || AA971269 || || 22868 || 315283	1.40465	1.16101
KIAA1005 || KIAA1005 protein || Hs.298382 || AI018605 || || 23322 || 103780	1.65108	0.451626
KIAA1036 || KIAA1036 || Hs.525479 || AA862814 || || 22846 || 224941	1.30284	1.87613
KIAA1036 || KIAA1036 || Hs.525479 || AI360738 || || 22846 || 309655	1.40566	0.542583
KIAA1107 || KIAA1107 protein || Hs.21554 || AA863471 || || 23285 || 221791	1.31975	1.68793
KIAA1126 || KIAA1126 protein || Hs.372492 || N29778 || || 57210 || 109893	1.54705	0.244054
KIAA1295 || KIAA1295 || Hs.285666 || AA398364 || || 57517 || 117100	1.63003	0.244054
KIAA1337 || KIAA1337 protein || Hs.202355 || AA629570 || || 57540 || 222017	1.44094	0.451626
KIAA1345 || KIAA1345 protein || Hs.303820 || AA394145 || || 57545 || 119309	1.52104	0.244054
KIAA1430 || KIAA1430 || Hs.535734 || AA429859 || || 57587 || 100003	1.43552	0.793728
KIAA1443 || Protein phosphatase 1, regulatory (inhibitor) subunit 3E || Hs.39911 || N62985 || || 57594 || 101236	1.77735	0.185724
KIAA1447 || KIAA1447 protein || Hs.535493 || N68942 || || 57597 || 225268	1.42256	0.451626
KIAA1450 || KIAA1450 protein || Hs.377588 || W31540 || || 57600 || 107733	1.57756	0.793728
KIAA1505 || KIAA1505 protein || Hs.113940 || AI022624 || || 57639 || 307428	1.58322	0.451626
KIAA1510 || KIAA1510 protein || Hs.271285 || H24355 || || 57642 || 120903	1.33347	1.32401
KIAA1536 || KIAA1536 protein || Hs.156667 || AI347694 || || 57658 || 312785	1.3726	1.62173
KIAA1545 || KIAA1545 protein || Hs.411138 || AI298120 || || 57666 || 311428	1.72386	0.364305
KIAA1559 || Mouse zinc finger protein 14-like || Hs.35524 || AI073993 || Unknown UG Hs.133930 EST || 57677 || 177439	1.36313	1.47707
KIAA1598 || KIAA1598 || Hs.501140 || AI089401 || || 57698 || 314993	1.4733	0.185724
KIAA1671 || KIAA1671 protein || Hs.419171 || N49774 || || 85379 || 99704	1.45461	1.32401
KIAA1787 || G protein pathway suppressor 2 || Hs.438219 || AA453458 || || 84461 || 120020	1.39432	0.425188
KIAA1799 || KIAA1799 protein || Hs.269768 || H56894 || || 84455 || 105354	1.66738	0.0990004
KIAA1833 || Hypothetical protein KIAA1833 || Hs.443139 || AA534321 || || 377711 || 98715	1.51277	0.451626
KIAA1843 || KIAA1843 protein || Hs.516658 || AI004062 || || 84540 || 310918	1.47517	0.704799
KIAA1971 || **Similar to junction-mediating and regulatory protein p300 JMY || Hs.377360 || N71692 || || 123720 || 118619	1.65768	0.185724
KIBRA || KIBRA protein || Hs.484047 || T97707 || || 23286 || 107486	1.4865	0.244054
KIF1C || Kinesin family member 1C || Hs.435120 || AA159770 || || 10749 || 113646	1.41847	0.793728
KISS1 || KiSS-1 metastasis-suppressor || Hs.95008 || AA464595 || || 3814 || 102348	1.36247	1.16101
KLC2 || Likely ortholog of kinesin light chain 2 || Hs.280792 || AA626316 || || 64837 || 222383	1.59891	0
KLEIP || Kelch-like 20 (Drosophila) || Hs.495035 || AA486552 || || 27252 || 116586	1.5302	1.62173
KLF10 || Kruppel-like factor 10 || Hs.435001 || R79935 || || 7071 || 111406	1.6991	0.185724
KLF2 || Kruppel-like factor 2 (lung) || Hs.107740 || W69213 || || 10365 || 113243	1.57495	0.326679
KLHL6 || Kelch-like 6 (Drosophila) || Hs.333181 || T95358 || || 89857 || 113929	1.61575	0.326679
KLHL8 || Kelch-like 8 (Drosophila) || Hs.106601 || AA878129 || || 57563 || 104858	1.52528	0.185724
KLK10 || Kallikrein 10 || Hs.275464 || AA458489 || || 5655 || 310110	1.34677	1.68793
KLK3 || Kallikrein 3, (prostate specific antigen) || Hs.171995 || AA588358 || || 354 || 115012	1.64745	0.326679
KLK6 || Kallikrein 6 (neurosin, zyme) || Hs.79361 || AA454743 || || 5653 || 115237	1.4304	0.364305
KMO || **Kynurenine 3-monooxygenase (kynurenine 3-hydroxylase) || Hs.409081 || AA150060 || || 8564 || 104678	1.50925	0.367894
KRAS2 || **V-Ki-ras2 Kirsten rat sarcoma viral oncogene homolog || Hs.505033 || AA505083 || || 3845 || 307604	1.37512	1.68793
KREMEN1 || **Kringle containing transmembrane protein 1 || Hs.229335 || AA234669 || || 83999 || 119243	1.70958	0.185724
KRT13 || Keratin 13 || Hs.463032 || W60057 || || 3860 || 104170	1.43188	1.07143
KRT6B || Keratin 6B || Hs.524438 || AA026418 || keratin 6 isoform K6b=KRT6B || 3854 || 120005	1.83712	0.185724
KRTHA5 || Keratin, hair, acidic, 5 || Hs.73082 || AI140753 || || 3886 || 318988	1.44362	0.542583
KRTHB5 || Keratin, hair, basic, 5 || Hs.182507 || AA022951 || || 3891 || 109469	1.38678	1.32401
L1CAM || L1 cell adhesion molecule || Hs.522818 || AI671234 || || 3897 || 331014	1.5978	0.793728
LACTB || Lactamase, beta || Hs.410388 || AA194033 || || 114294 || 101271	1.51845	1.07143
LAF4 || Lymphoid nuclear protein related to AF4 || Hs.444414 || AI821049 || || 3899 || 101559	1.32106	1.87613
LAF4 || Lymphoid nuclear protein related to AF4 || Hs.444414 || N73316 || || 3899 || 119642	1.64814	0.131852
LAMA4 || Laminin, alpha 4 || Hs.213861 || AA678918 || || 3910 || 108728	1.46213	0.326679
LAMP1 || Lysosomal-associated membrane protein 1 || Hs.494419 || H28973 || || 3916 || 101765	1.40292	1.68793
LAP3 || Leucine aminopeptidase 3 || Hs.479264 || AA757812 || || 51056 || 309930	1.40106	1.07143
LARP || Likely ortholog of mouse la related protein || Hs.292078 || AA972120 || || 23367 || 310243	1.29099	0.803811
LARS2 || Leucyl-tRNA synthetase 2, mitochondrial || Hs.526975 || H51075 || || 23395 || 100074	1.31053	1.68793
LASS5 || LAG1 longevity assurance homolog 5 (S. cerevisiae) || Hs.270525 || AA176483 || || 91012 || 101599	1.37144	0.94976
LDB2 || LIM domain binding 2 || Hs.23748 || AI049803 || || 9079 || 112404	1.43485	1.16101
LDLR || Low density lipoprotein receptor (familial hypercholesterolemia) || Hs.213289 || AA669312 || || 3949 || 104527	1.40322	1.87613
LEMD1 || LEM domain containing 1 || Hs.181245 || AA421242 || || 93273 || 102064	1.39872	1.32401
LGALS2 || Lectin, galactoside-binding, soluble, 2 (galectin 2) || Hs.531776 || AA872397 || || 3957 || 114352	1.79955	0.0990004
LGI2 || Leucine-rich repeat LGI family, member 2 || Hs.12488 || R42056 || || 55203 || 99221	1.42509	0.704799
LIN7A || Lin-7 homolog A (C. elegans) || Hs.144333 || AA757170 || || 8825 || 111134	1.63055	0.542583
LISCH7 || Liver-specific bHLH-Zip transcription factor || Hs.466507 || AA527172 || || 51599 || 117512	1.87166	0.131852
LITAF || Lipopolysaccharide-induced TNF factor || Hs.459940 || AA625666 || || 9516 || 112579	1.38244	1.32401
LMNA || Lamin A/C || Hs.491359 || AA489582 || || 4000 || 105941	1.47668	1.87613
LMO7 || LIM domain 7 || Hs.207631 || AA777749 || || 4008 || 223006	1.61316	0.542583
LNPEP || Leucyl/cystinyl aminopeptidase || Hs.551507 || AA487918 || || 4012 || 105100	1.55756	0.364305
LOC112868 || Hypothetical protein LOC112868 || Hs.97837 || AA454756 || || 112868 || 119125	1.9916	0
LOC114984 || Hypothetical protein BC014089 || Hs.534525 || AA457162 || || 114984 || 116559	1.31614	1.16101
LOC120379 || Hypothetical protein BC019238 || Hs.420662 || AI339257 || || 120379 || 315314	1.33564	0.803811
LOC124446 || Hypothetical protein BC017488 || Hs.460574 || W93317 || || 124446 || 103758	1.46548	1.68793
LOC130617 || Hypothetical protein BC018415 || Hs.534540 || AA995071 || || 130617 || 318757	1.58501	0.244054
LOC134121 || Hypothetical protein LOC134121 || Hs.356226 || AA626697 || || 134121 || 223857	1.57116	0.793728
LOC136306 || Hypothetical protein LOC136306 || Hs.99414 || AA455897 || || 136306 || 119944	1.34667	1.62173
LOC138255 || OTTHUMP00000021439 || Hs.444459 || AI216761 || || 138255 || 316995	1.32603	2.01742
LOC147808 || Similar to zinc finger protein || Hs.53996 || N47316 || || 147808 || 223601	1.79002	0
LOC147991 || Hypothetical protein MGC35440 || Hs.194392 || AA782314 || || 147991 || 224186	1.31355	1.47707
LOC148203 || Similar to zinc finger protein 91 (HPF7, HTF10) || Hs.359535 || AA454861 || || 148203 || 119827	1.30498	1.07143
LOC148203 || Similar to zinc finger protein 91 (HPF7, HTF10) || Hs.359535 || AA455804 || || 148203 || 114054	1.57696	0.364305
LOC149351 || Hypothetical protein LOC149351 || Hs.546492 || AA699644 || || 149351 || 222135	1.39439	0.793728
LOC149837 || Hypothetical protein LOC149837 || Hs.123609 || AA705798 || || 149837 || 225556	1.53355	0.131852
LOC151658 || Hypothetical protein LOC151658 || Hs.159043 || AA609334 || || 151658 || 102246	1.67612	0.185724
LOC152078 || Hypothetical protein BC010062 || Hs.259046 || AA131576 || || 152078 || 103110	1.64635	0
LOC152742 || Hypothetical protein LOC152742 || Hs.135435 || AI075949 || || 152742 || 313062	1.48297	0.425188
LOC161247 || Similar to CG10671-like || Hs.128060 || AA181506 || || 161247 || 220345	1.36043	1.62173
LOC199899 || Hypothetical protein LOC199899 || Hs.116210 || AA628192 || || 199899 || 226415	1.52737	0.425188
LOC220074 || Hypothetical 55.1 kDa protein F09G8.5 in chromosome III || Hs.317243 || AA527451 || || 220074 || 106261	1.51169	0.425188
LOC222171 || Hypothetical protein LOC222171 || Hs.91109 || AA515032 || || 222171 || 119736	2.25283	0
LOC254808 || Hypothetical protein LOC254808 || Hs.128066 || AA970740 || || 254808 || 118972	1.51746	0.94976
LOC257106 || Hypothetical protein LOC257106 || Hs.389374 || W72330 || || 257106 || 318861	1.33383	1.32401
LOC283130 || Hypothetical protein LOC283130 || Hs.435510 || AA910933 || || 283130 || 101830	1.35688	1.47707
LOC283501 || Hypothetical protein LOC283501 || Hs.508757 || AA563957 || || 283501 || 119076	2.08076	0
LOC283680 || Hypothetical protein LOC283680 || Hs.220864 || AA857115 || || 283680 || 223241	1.5763	0.185724
LOC283761 || Hypothetical protein LOC283761 || Hs.459288 || AA453473 || || 283761 || 114290	1.32873	1.87613
LOC283824 || Hypothetical protein LOC283824 || Hs.22907 || AA973634 || || 283824 || 101183	1.88758	0
LOC284361 || Hypothetical protein LOC284361 || Hs.515550 || AA459674 || || 284361 || 98849	1.37066	0.542583
LOC284591 || Hypothetical protein LOC284591 || Hs.133183 || AI051839 || || 284591 || 315957	1.6625	0.185724
LOC284611 || Hypothetical protein LOC284611 || Hs.200230 || H06235 || || 284611 || 109662	1.56622	0.367894
LOC285016 || Hypothetical protein LOC285016 || Hs.355207 || AI300876 || || 285016 || 317605	1.30538	1.62173
LOC285043 || Hypothetical protein LOC285043 || Hs.429119 || AA669081 || || 285043 || 118140	1.462	1.07143
LOC285550 || Hypothetical protein LOC285550 || Hs.399980 || W80963 || || 285550 || 119693	1.34195	1.87613
LOC285708 || Hypothetical protein LOC285708 || Hs.533011 || AA524330 || || 285708 || 116144	1.49356	0.244054
LOC285888 || Hypothetical protein LOC285888 || Hs.146751 || AI147733 || || 285888 || 316259	1.61265	0.247501
LOC286103 || Hypothetical protein LOC286103 || Hs.359978 || AI092855 || || 286103 || 311951	1.60283	0.425188
LOC339287 || Hypothetical protein LOC339287 || Hs.532786 || W60310 || || 339287 || 113288	1.38145	2.01742
LOC340073 || Hypothetical protein LOC340073 || Hs.434422 || AA412247 || || 340073 || 100365	1.34611	1.62173
LOC340094 || Hypothetical protein LOC340094 || Hs.132312 || AA923240 || || 340094 || 318430	1.29851	1.47707
LOC360030 || Homeobox C14 || Hs.484779 || AA477737 || || 360030 || 118346	1.41239	1.47707
LOC360030 || Homeobox C14 || Hs.484779 || AA505401 || || 360030 || 106129	2.39547	0
LOC360030 || Homeobox C14 || Hs.484779 || AI016673 || || 360030 || 99641	1.34312	1.68793
LOC375449 || Similar to microtubule associated testis specific serine/threonine protein kinase || Hs.482329 || AI289258 || || 375449 || 312604	1.57853	0.247501
LOC388335 || Similar to RIKEN cDNA A730055C05 gene || Hs.462230 || R83846 || || 388335 || 119835	1.47414	0.793728
LOC389072 || Hypothetical protein LOC389072 || Hs.532955 || AI302566 || || 389072 || 316528	1.29061	1.16101
LOC401320 || Hypothetical LOC401320 || Hs.176854 || AA284294 || || 401320 || 119916	1.42384	0.803811
LOC440894 || **Hypothetical protein LOC440894 || Hs.516403 || N71157 || || 440894 || 102857	1.37666	1.68793
LOC51236 || Brain protein 16 || Hs.300224 || AA776794 || || 51236 || 220303	1.78296	0.185724
LOC51315 || Hypothetical protein LOC51315 || Hs.469254 || AA194142 || || 51315 || 109003	1.44175	1.47707
LOC51619 || Ubiquitin-conjugating enzyme E2D 4 (putative) || Hs.19196 || N26172 || || 51619 || 225535	1.48752	0.704799
LOC51760 || B/K protein || Hs.258326 || AA705977 || || 51760 || 220598	1.32737	1.68793
LOC55954 || **U11/U12 snRNP 20K || Hs.38628 || N23135 || || 55954 || 220403	1.82933	0
LOC90520 || Hypothetical protein LOC90520 || Hs.552781 || AA400114 || || 90520 || 101002	1.36766	1.32401
LOC90806 || Similar to RIKEN cDNA 2610307I21 || Hs.157078 || N30792 || || 90806 || 103666	1.32036	1.32401
LOC90925 || Hypothetical protein LOC90925 || Hs.81221 || AA505044 || Immunoglobulin heavy chain V(H)5 pseudogene L2-9 transcript || 90925 || 103943	2.32564	0
LOC9884 || Hypothetical LOC9884 || Hs.438861 || AA133692 || || 9884 || 98581	1.69329	0.131852
LPHN3 || Latrophilin 3 || Hs.28391 || R63090 || || 23284 || 109464	1.54463	0.94976
LPL || Lipoprotein lipase || Hs.180878 || AA633835 || || 4023 || 120065	1.40032	1.47707
LPL || Lipoprotein lipase || Hs.180878 || AA976046 || || 4023 || 102449	1.77377	0.131852
LPP || LIM domain containing preferred translocation partner in lipoma || Hs.444362 || AI925455 || || 4026 || 330281	1.67845	0.131852
LPPR2 || Lipid phosphate phosphatase-related protein type 2 || Hs.6846 || AI341987 || || 64748 || 319257	1.7424	0.131852
LRIG1 || Leucine-rich repeats and immunoglobulin-like domains 1 || Hs.518055 || AA235709 || || 26018 || 101567	1.48898	1.62173
LRP1 || Low density lipoprotein-related protein 1 (alpha-2-macroglobulin receptor) || Hs.162757 || AA464566 || || 4035 || 106241	1.8454	0.131852
LRP2 || Low density lipoprotein-related protein 2 || Hs.470538 || AI668574 || || 4036 || 104405	1.38924	1.07143
LRP2 || Low density lipoprotein-related protein 2 || Hs.470538 || AI821048 || || 4036 || 118712	2.165	0.0990004
LRP6 || Low density lipoprotein receptor-related protein 6 || Hs.210343 || AI261935 || || 4040 || 103932	2.67551	0
LRRC28 || Leucine rich repeat containing 28 || Hs.459507 || H00107 || || 123355 || 113813	1.48837	0.244054
LRRC7 || Leucine rich repeat containing 7 || Hs.479658 || AA609242 || || 57554 || 113944	1.59412	1.68793
LRRIQ1 || Leucine-rich repeats and IQ motif containing 1 || Hs.531254 || N40969 || || 84125 || 225131	1.48556	0.704799
LRRK2 || Leucine-rich repeat kinase 2 || Hs.187636 || AI302471 || || 120892 || 319867	2.54153	0
LRRN3 || Leucine rich repeat neuronal 3 || Hs.3781 || AA777002 || || 54674 || 222900	1.66552	0.542583
LRRN6D || RAR-related orphan receptor C || Hs.256022 || AA928869 || || 339398 || 103323	2.3984	0
LSAMP || Limbic system-associated membrane protein || Hs.477234 || AA933871 || || 4045 || 222060	1.39589	1.16101
LY6G6C || Lymphocyte antigen 6 complex, locus G6C || Hs.241586 || R25237 || || 80740 || 318565	1.47167	0.94976
LYPLAL1 || Lysophospholipase-like 1 || Hs.125291 || AI301330 || || 127018 || 318947	1.48011	0.94976
M6PR || Mannose-6-phosphate receptor (cation dependent) || Hs.134084 || AI290482 || || 4074 || 312299	1.53727	0.425188
MAD1L1 || MAD1 mitotic arrest deficient-like 1 (yeast) || Hs.209128 || AA916543 || || 8379 || 317475	1.53377	0.451626
MAG || Myelin associated glycoprotein || Hs.515354 || AI948541 || || 4099 || 330684	1.34108	1.47707
MAGI1 || Membrane associated guanylate kinase interacting protein-like 1 || Hs.16064 || N62729 || || 154043 || 225915	1.52155	0.803811
MAL2 || Mal, T-cell differentiation protein 2 || Hs.201083 || AA453783 || || 114569 || 102977	1.44236	2.01742
MAP2K4 || Mitogen-activated protein kinase kinase 4 || Hs.514681 || AA132559 || || 6416 || 100555	1.84728	0
MAP2K4 || Mitogen-activated protein kinase kinase 4 || Hs.514681 || AA293050 || MEK4=MKK4=MAP kinase kinase 4=sek1=JNK activating kinase 1 || 6416 || 106891	1.38162	1.68793
MAP3K11 || Mitogen-activated protein kinase kinase kinase 11 || Hs.502872 || R80779 || protein kinase (MLK-3) || 4296 || 114832	1.55003	0.247501
MAP3K8 || Mitogen-activated protein kinase kinase kinase 8 || Hs.432453 || W42450 || || 1326 || 100952	1.57264	1.32401
MAP4K3 || **Mitogen-activated protein kinase kinase kinase kinase 3 || Hs.468239 || AA424939 || || 8491 || 100759	1.76983	0.185724
MAPK10 || Mitogen-activated protein kinase 10 || Hs.25209 || AI961583 || || 5602 || 330653	1.42325	1.32401
MAPK8 || Mitogen-activated protein kinase 8 || Hs.522924 || W47666 || || 5599 || 111596	1.3625	1.62173
MAPK8IP1 || Mitogen-activated protein kinase 8 interacting protein 1 || Hs.234249 || AI206407 || || 9479 || 319275	1.49091	0.425188
MARCH-I || Membrane-associated ring finger (C3HC4) 1 || Hs.136900 || AA946862 || || 55016 || 317994	1.29753	1.07143
MATN3 || **Matrilin 3 || Hs.6985 || R43017 || || 4148 || 116776	1.99697	0.185724
MBD1 || Methyl-CpG binding domain protein 1 || Hs.405610 || AA877671 || || 4152 || 99227	1.34455	1.62173
MBD5 || Methyl-CpG binding domain protein 5 || Hs.458312 || AI084483 || || 55777 || 312283	1.39759	0.542583
MBP || Myelin basic protein || Hs.501262 || AI205687 || || 4155 || 312404	1.53839	0.704799
MCART1 || Mitochondrial carrier triple repeat 1 || Hs.46791 || AA708149 || || 92014 || 226770	1.52955	0.185724
MCFP || Mitochondrial carrier family protein || Hs.208414 || AI088691 || || 55972 || 309113	1.4559	1.07143
MCM5 || MCM5 minichromosome maintenance deficient 5, cell division cycle 46 (S. cerevisiae) || Hs.517582 || W94630 || || 4174 || 117845	1.56169	0.247501
MCRS1 || Microspherule protein 1 || Hs.25313 || AA488757 || || 10445 || 108784	1.57814	0.803811
MCSP || Mitochondrial capsule selenoprotein || Hs.111850 || AA609976 || || 4184 || 116836	1.53174	0.247501
MDFI || MyoD family inhibitor || Hs.520119 || AI963860 || || 4188 || 330856	1.51751	1.07143
MDH1B || Malate dehydrogenase 1B, NAD (soluble) || Hs.147816 || AI025196 || || 130752 || 309436	1.63599	0.326679
MDK || Midkine (neurite growth-promoting factor 2) || Hs.82045 || T54814 || || 4192 || 106202	1.92394	0
ME1 || Malic enzyme 1, NADP(+)-dependent, cytosolic || Hs.21160 || R12785 || || 4199 || 99600	1.39674	0.793728
MECT1 || Mucoepidermoid carcinoma translocated 1 || Hs.371096 || T95320 || || 23373 || 105551	1.45961	0.793728
MEF2C || MADS box transcription enhancer factor 2, polypeptide C (myocyte enhancer factor 2C) || Hs.444409 || AA504131 || Unknown UG Hs.105723 EST || 4208 || 162152	1.44517	0.425188
MEF2D || MADS box transcription enhancer factor 2, polypeptide D (myocyte enhancer factor 2D) || Hs.314327 || AW044183 || || 4209 || 330571	1.74082	0.185724
MEG3 || Maternally expressed 3 || Hs.534463 || AA425780 || || 55384 || 309868	1.86727	0.704799
MEGF11 || MEGF11 protein || Hs.438250 || AA496109 || || 84465 || 118361	1.3351	1.87613
MGAT3 || Mannosyl (beta-1,4-)-glycoprotein beta-1,4-N-acetylglucosaminyltransferase || Hs.276808 || AA421473 || || 4248 || 98661	1.35926	0.793728
MGAT5 || Mannosyl (alpha-1,6-)-glycoprotein beta-1,6-N-acetyl-glucosaminyltransferase || Hs.115903 || AA577187 || || 4249 || 113718	1.47324	1.62173
MGC10433 || Hypothetical protein MGC10433 || Hs.5086 || R37738 || || 79171 || 110109	1.46671	1.87613
MGC10986 || Hypothetical protein MGC10986 || Hs.514402 || W72885 || || 80774 || 226289	1.56793	0.425188
MGC11332 || Hypothetical protein MGC11332 || Hs.98798 || AA434145 || || 84804 || 111359	3.13903	0
MGC13017 || Similar to RIKEN cDNA A430101B06 gene || Hs.156506 || AA206864 || || 91368 || 111073	1.495	1.47707
MGC14161 || Hypothetical protein MGC14161 || Hs.368399 || R11666 || || 84978 || 310238	1.46711	0.185724
MGC14798 || Similar to RIKEN cDNA 5730421E18 gene || Hs.107196 || AI245807 || || 89978 || 313799	1.33427	1.87613
MGC15476 || Thymus expressed gene 3-like || Hs.515490 || W72525 || || 147906 || 109676	2.30094	0
MGC16121 || Hypothetical protein MGC16121 || Hs.416379 || AA634409 || || 84848 || 224867	1.69432	0.326679
MGC23401 || Hypothetical protein MGC23401 || Hs.527874 || AA609585 || || 196441 || 100042	1.38235	2.01742
MGC23985 || Similar to AVLV472 || Hs.173059 || AA436232 || || 389336 || 107629	2.37891	0
MGC2654 || Hypothetical protein MGC2654 || Hs.306380 || AA477314 || || 79091 || 103094	1.52666	0.451626
MGC26610 || Hypothetical protein MGC26610 || Hs.55150 || AI336032 || || 133690 || 313646	1.55711	0.364305
MGC26733 || Hypothetical protein MGC26733 || Hs.269977 || AA609861 || || 200403 || 99866	2.01947	0.185724
MGC26979 || Hypothetical protein MGC26979 || Hs.116240 || AA634283 || || 91147 || 225563	1.40501	1.07143
MGC3036 || LOC442643 || Hs.488679 || AA468630 || || 65999 || 114828	1.6283	0.185724
MGC3036 || LOC442643 || Hs.488679 || AA468776 || || 65999 || 104969	1.48558	0.803811
MGC33486 || Hypothetical protein MGC33486 || Hs.399779 || AI215667 || || 256472 || 316643	1.38141	1.62173
MGC33600 || Hypothetical protein MGC33600 || Hs.189183 || AA620975 || || 202500 || 220696	1.33859	1.16101
MGC34648 || Hypothetical protein MGC34648 || Hs.469359 || AA568176 || || 199870 || 101744	1.52023	0.247501
MGC34728 || Hypothetical protein MGC34728 || Hs.178210 || AA628167 || || 152065 || 309520	1.57171	0.94976
MGC35338 || Hypothetical protein MGC35338 || Hs.528323 || AA506436 || || 130619 || 117038	2.44155	0
MGC40397 || Hypothetical protein MGC40397 || Hs.295563 || AA452572 || || 121053 || 99255	1.33206	1.16101
MGC42367 || Similar to 2010300C02Rik protein || Hs.469398 || AA746215 || || 343990 || 98466	1.84491	0.185724
MGC43690 || Hypothetical protein MGC43690 || Hs.131903 || AI281184 || || 253769 || 318720	1.43768	1.87613
MGC45441 || Hypothetical protein MGC45441 || Hs.488337 || H51434 || || 149473 || 225127	1.3298	1.47707
MGC4549 || Hypothetical protein MGC4549 || Hs.321391 || AA455267 || || 84337 || 114942	1.66795	0.367894
MGC4707 || MGC4707 protein || Hs.368296 || AA625900 || || 79096 || 225603	1.33631	1.07143
MGC48628 || Similar to KIAA1680 protein || Hs.405538 || AI241359 || || 401145 || 316938	1.37483	1.32401
MGC52110 || Hypothetical protein MGC52110 || Hs.177576 || AA557529 || || 493753 || 117640	1.90655	0.131852
MGC955 || Chromosome 1 open reading frame 50 || Hs.148845 || W42476 || || 79078 || 106805	1.58748	0.0990004
MGP || Matrix Gla protein || Hs.365706 || AA155913 || || 4256 || 109102	1.6078	0.451626
MICAL-L2 || MICAL-like 2 || Hs.376617 || AA570622 || || 79778 || 113585	2.42066	0.185724
MICAL-L2 || MICAL-like 2 || Hs.376617 || AA661722 || || 79778 || 115693	2.07636	0
MIR16 || Membrane interacting protein of RGS16 || Hs.512607 || AA190764 || || 51573 || 112373	1.38602	1.68793
MLL2 || Myeloid/lymphoid or mixed-lineage leukemia 2 || Hs.387381 || AI698719 || || 8085 || 331149	1.91815	0.185724
MLLT3 || Myeloid/lymphoid or mixed-lineage leukemia (trithorax homolog, Drosophila); translocated to, 3 || Hs.493585 || AI053570 || || 4300 || 102306	1.31491	1.87613
MLLT7 || Myeloid/lymphoid or mixed-lineage leukemia (trithorax homolog, Drosophila); translocated to, 7 || Hs.239663 || AI814178 || || 4303 || 331318	1.37493	1.16101
MLSTD1 || Male sterility domain containing 1 || Hs.298851 || AA935809 || || 55711 || 316841	1.53385	0.364305
MMP19 || Matrix metalloproteinase 19 || Hs.154057 || AA669222 || || 4327 || 117811	1.42883	0.542583
MMP19 || Matrix metalloproteinase 19 || Hs.154057 || AI361112 || || 4327 || 307055	1.48208	0.364305
MMP2 || Matrix metalloproteinase 2 (gelatinase A, 72kDa gelatinase, 72kDa type IV collagenase) || Hs.513617 || AA555166 || || 4313 || 110140	1.66057	0.704799
MMP27 || Matrix metalloproteinase 27 || Hs.534479 || AA424347 || || 64066 || 100372	1.68063	0.326679
MMP28 || Matrix metalloproteinase 28 || Hs.380710 || AI287569 || || 79148 || 316177	1.40597	0.704799
MNDA || Myeloid cell nuclear differentiation antigen || Hs.153837 || AI364884 || || 4332 || 317587	1.50963	1.07143
MNDA || Myeloid cell nuclear differentiation antigen || Hs.153837 || N29376 || Myeloid cell nuclear differentiation antigen || 4332 || 103683	2.61123	0
MOBK1B || MOB1, Mps One Binder kinase activator-like 1B (yeast) || Hs.196437 || AA876358 || || 55233 || 224033	1.50316	1.16101
MOBKL2B || MOB1, Mps One Binder kinase activator-like 2B (yeast) || Hs.369022 || AA983657 || || 79817 || 307135	1.43682	1.16101
MOCOS || Molybdenum cofactor sulfurase || Hs.405028 || AA633211 || || 55034 || 114050	1.41484	0.451626
MOV10L1 || Mov10l1, Moloney leukemia virus 10-like 1, homolog (mouse) || Hs.62880 || AA609579 || || 54456 || 104098	1.87434	0.131852
MPHOSPH9 || M-phase phosphoprotein 9 || Hs.507175 || N23137 || || 10198 || 117049	1.44937	0.451626
MRAS || Muscle RAS oncogene homolog || Hs.527021 || AI304356 || || 22808 || 98698	1.58318	1.32401
MRAS || Muscle RAS oncogene homolog || Hs.527021 || AI343006 || || 22808 || 311580	1.67461	0.793728
MRPL33 || Mitochondrial ribosomal protein L33 || Hs.515879 || AA284241 || || 9553 || 110816	1.53633	1.87613
MRPL43 || Mitochondrial ribosomal protein L43 || Hs.421848 || N74662 || || 84545 || 220425	1.37165	1.62173
MRPS22 || **Mitochondrial ribosomal protein S22 || Hs.550524 || AA600139 || || 56945 || 100305	1.44427	1.32401
MRPS24 || Mitochondrial ribosomal protein S24 || Hs.284286 || AA463446 || || 64951 || 106746	1.43825	2.01742
MRS2L || MRS2-like, magnesium homeostasis factor (S. cerevisiae) || Hs.533291 || AA576333 || || 57380 || 116953	1.75483	0.131852
MRS2L || MRS2-like, magnesium homeostasis factor (S. cerevisiae) || Hs.533291 || AA576342 || || 57380 || 109202	1.52918	0.367894
MS4A1 || Membrane-spanning 4-domains, subfamily A, member 1 || Hs.438040 || AA505050 || || 931 || 226879	1.49337	0.425188
MSH5 || MutS homolog 5 (E. coli) || Hs.371225 || AA872677 || || 4439 || 221227	1.42659	1.07143
MSLN || Mesothelin || Hs.408488 || AI056417 || || 10232 || 308694	1.56871	0.185724
MSMB || Microseminoprotein, beta- || Hs.255462 || AA420632 || || 4477 || 98536	1.36447	1.47707
MSP || Transmembrane protease, serine 13 || Hs.266308 || AA401923 || || 84000 || 107481	1.32742	1.62173
MSR1 || Macrophage scavenger receptor 1 || Hs.446291 || AI342012 || || 4481 || 307794	1.61405	0.185724
MT1G || Metallothionein 1G || Hs.433391 || AI745626 || || 4495 || 331124	1.68582	0.247501
MT3 || Metallothionein 3 (growth inhibitory factor (neurotrophic)) || Hs.73133 || AI362950 || || 4504 || 309373	1.43603	0.704799
MTCP1 || Mature T-cell proliferation 1 || Hs.6917 || AA029308 || || 4515 || 116037	1.68463	0.185724
MTHFD2L || Hypothetical LOC541467 || Hs.479954 || AA620707 || || 441024 || 105495	1.3663	0.94976
MTHFD2L || Hypothetical LOC541467 || Hs.479954 || AA678375 || || 441024 || 227045	1.41639	1.47707
MTSS1 || Metastasis suppressor 1 || Hs.336994 || N31574 || || 9788 || 309265	1.85571	0.185724
MTUS1 || Mitochondrial tumor suppressor 1 || Hs.7946 || AA621202 || || 57509 || 114732	1.45862	0.247501
MUC12 || Mucin 12 || Hs.489355 || AA534814 || || 10071 || 110555	2.34428	0
MUC2 || Mucin 2, intestinal/tracheal || Hs.315 || AA534503 || || 4583 || 118301	1.96638	0
MUC5B || Mucin 5, subtype B, tracheobronchial || Hs.523395 || AA587390 || || 4587 || 111015	1.3352	1.87613
MX1 || **Myxovirus (influenza virus) resistance 1, interferon-inducible protein p78 (mouse) || Hs.517307 || AA193603 || || 4599 || 117754	1.53733	0.451626
MYB || V-myb myeloblastosis viral oncogene homolog (avian) || Hs.531941 || W86100 || || 4602 || 111353	1.85003	0.131852
MYBPC3 || Myosin binding protein C, cardiac || Hs.524906 || AI371190 || || 4607 || 314970	1.45241	0.364305
MYBPH || Myosin binding protein H || Hs.927 || AA461174 || || 4608 || 120870	1.51162	0.244054
MYBPHL || Myosin binding protein H-like || Hs.443402 || H79798 || || 343263 || 307262	1.54473	0.247501
MYH11 || Myosin, heavy polypeptide 11, smooth muscle || Hs.460109 || AA662473 || || 4629 || 117023	2.10304	0
MYL6 || Myosin, light polypeptide 6, alkali, smooth muscle and non-muscle || Hs.505705 || AA488346 || || 4637 || 119707	1.44032	1.62173
MYO1A || Myosin IA || Hs.5394 || AI817883 || || 4640 || 330619	1.67108	0.185724
MYO1F || Myosin IF || Hs.408451 || AI360772 || || 4542 || 312366	1.50697	0.247501
MYO5B || Myosin VB || Hs.550481 || AA460302 || || 4645 || 110041	1.31124	1.62173
MYOM2 || Myomesin (M-protein) 2, 165kDa || Hs.443683 || AI186799 || || 9172 || 311147	1.41361	0.803811
MYST1 || MYST histone acetyltransferase 1 || Hs.533803 || N25598 || || 84148 || 220101	1.75321	0
NAALAD2 || N-acetylated alpha-linked acidic dipeptidase 2 || Hs.503560 || AA542921 || || 10003 || 118344	2.38176	0.131852
NAALAD2 || N-acetylated alpha-linked acidic dipeptidase 2 || Hs.503560 || AA564887 || || 10003 || 116201	2.30585	0
NACA || Nascent-polypeptide-associated complex alpha polypeptide || Hs.505735 || AW058227 || || 4666 || 331336	1.36741	2.01742
NALP1 || NACHT, leucine rich repeat and PYD (pyrin domain) containing 1 || Hs.513902 || AI365110 || || 22861 || 312213	1.41528	2.01742
NANOS1 || Nanos homolog 1 (Drosophila) || Hs.351851 || AI299731 || || 340719 || 311144	1.61261	0.131852
NCE2 || NEDD8-conjugating enzyme || Hs.471785 || W70221 || || 140739 || 222397	1.43052	0.704799
NCF4 || Neutrophil cytosolic factor 4, 40kDa || Hs.474781 || AA969460 || || 4689 || 308951	1.86091	0.185724
NCKIPSD || NCK interacting protein with SH3 domain || Hs.102929 || N94372 || || 51517 || 120382	1.36979	1.87613
NCOR1 || Nuclear receptor co-repressor 1 || Hs.462323 || AA468619 || || 9611 || 107572	1.55486	0.425188
NDFIP2 || Nedd4 family interacting protein 2 || Hs.525093 || AI301081 || || 54602 || 314699	2.04854	0
NDRG1 || N-myc downstream regulated gene 1 || Hs.372914 || AA131083 || || 10397 || 105843	2.1303	0
NDRG1 || N-myc downstream regulated gene 1 || Hs.372914 || AA132859 || || 10397 || 100886	2.34828	0
NDST2 || N-deacetylase/N-sulfotransferase (heparan glucosaminyl) 2 || Hs.225129 || AA934803 || || 8509 || 105741	1.59819	0.367894
NDUFA1 || NADH dehydrogenase (ubiquinone) 1 alpha subcomplex, 1, 7.5kDa || Hs.534168 || AA083784 || || 4694 || 111218	1.79305	1.62173
NDUFA10 || NADH dehydrogenase (ubiquinone) 1 alpha subcomplex, 10, 42kDa || Hs.277677 || AA657981 || || 4705 || 105384	1.5127	0.94976
NDUFS1 || **NADH dehydrogenase (ubiquinone) Fe-S protein 1, 75kDa (NADH-coenzyme Q reductase) || Hs.471207 || AA150435 || || 4719 || 117543	1.54176	0.364305
NEDD4 || Neural precursor cell expressed, developmentally down-regulated 4 || Hs.1565 || AA442095 || || 4734 || 108751	1.50251	0.542583
NEDD4L || Neural precursor cell expressed, developmentally down-regulated 4-like || Hs.185677 || AA458578 || || 23327 || 117792	1.35475	1.62173
NESG1 || Nasopharyngeal epithelium specific protein 1 || Hs.158450 || AI245615 || || 25790 || 313786	2.08911	0
NEURL2 || Neuralized-like 2 (Drosophila) || Hs.517094 || AI097227 || || 140825 || 314487	1.57447	0.704799
NFASC || Neurofascin || Hs.13349 || AA665583 || || 23114 || 104859	1.34404	0.704799
NFASC || Neurofascin || Hs.13349 || AA665985 || || 23114 || 104210	1.49466	0.451626
NFATC3 || Nuclear factor of activated T-cells, cytoplasmic, calcineurin-dependent 3 || Hs.341716 || AA857871 || || 4775 || 222094	2.00856	0
NFE2L2 || Nuclear factor (erythroid-derived 2)-like 2 || Hs.155396 || R10007 || || 4780 || 118399	1.30188	1.68793
NFIA || Nuclear factor I/A || Hs.191911 || AA022462 || || 4774 || 104291	1.60465	0.425188
NFIL3 || Nuclear factor, interleukin 3 regulated || Hs.79334 || AA633811 || || 4783 || 111619	1.39173	1.87613
NFIX || Nuclear factor I/X (CCAAT-binding transcription factor) || Hs.257970 || R08310 || || 4784 || 118486	1.6421	0.542583
NFYB || Nuclear transcription factor Y, beta || Hs.84928 || AA194974 || || 4801 || 104424	1.63937	0.185724
NHS || Nance-Horan syndrome (congenital cataracts and dental anomalies) || Hs.201623 || AI261293 || || 4810 || 110029	1.91799	0.244054
NHSL1 || NHS-like 1 || Hs.486596 || N49275 || || 57224 || 224604	1.44908	0.793728
NINJ1 || Ninjurin 1 || Hs.494457 || AA625806 || || 4814 || 113163	1.38817	2.01742
NLGN3 || Neuroligin 3 || Hs.438877 || AI159884 || || 54413 || 316083	1.50483	0.425188
NMB || Neuromedin B || Hs.386470 || AI650675 || || 4828 || 311078	1.62409	0.367894
NME2 || **Non-metastatic cells 2, protein (NM23B) expressed in || Hs.463456 || AA422058 || || 4831 || 104744	1.50434	1.62173
NME5 || Non-metastatic cells 5, protein expressed in (nucleoside-diphosphate kinase) || Hs.519602 || AA453579 || || 8382 || 104663	2.22833	0
NOL4 || Nucleolar protein 4 || Hs.546322 || AA430033 || || 8715 || 120913	1.38869	1.16101
NOS3 || Nitric oxide synthase 3 (endothelial cell) || Hs.511603 || H01039 || || 4846 || 102298	1.78565	0.131852
NPC2 || Niemann-Pick disease, type C2 || Hs.433222 || AA630449 || || 10577 || 102649	1.74561	0.367894
NPL4 || Nuclear protein localization 4 || Hs.464333 || AA579598 || || 55666 || 111210	2.16101	0
NPY || Neuropeptide Y || Hs.1832 || AI675889 || || 4852 || 312710	1.39644	1.62173
NR2F2 || Nuclear receptor subfamily 2, group F, member 2 || Hs.347991 || AA056224 || || 7026 || 109663	1.57413	0
NRCAM || Neuronal cell adhesion molecule || Hs.21422 || AA826148 || || 4897 || 117087	1.36496	1.16101
NRF1 || Nuclear respiratory factor 1 || Hs.298069 || AA454935 || Unknown UG Hs.180069 nuclear respiratory factor 1 || 4899 || 187040	1.61652	0.367894
NRP2 || Neuropilin 2 || Hs.471200 || AA009627 || || 8828 || 111349	1.68151	0.244054
NRP2 || Neuropilin 2 || Hs.471200 || R36523 || || 8828 || 101349	1.88314	0.131852
NRXN1 || Neurexin 1 || Hs.468505 || AA621246 || || 9378 || 100812	1.41343	1.68793
NSD1 || Nuclear receptor binding SET domain protein 1 || Hs.208961 || AA829567 || || 64324 || 108322	1.89177	0.185724
NSF || N-ethylmaleimide-sensitive factor || Hs.431279 || AA740404 || || 4905 || 110393	2.6253	0
NSMAF || Neutral sphingomyelinase (N-SMase) activation associated factor || Hs.372000 || AA046107 || || 8439 || 109994	1.54829	0.185724
NT5M || 5',3'-nucleotidase, mitochondrial || Hs.513977 || AA446187 || || 56953 || 99582	1.54964	0.185724
NTN1 || Netrin 1 || Hs.128002 || AA972545 || || 9423 || 99870	2.08544	0
NTNG1 || Netrin G1 || Hs.211236 || AA001497 || || 22854 || 306933	1.39991	2.01742
NTRK2 || Neurotrophic tyrosine kinase, receptor, type 2 || Hs.494312 || N63949 || TRKB=protein-tyrosine kinase || 4915 || 99202	1.36175	1.68793
NUDT14 || Nudix (nucleoside diphosphate linked moiety X)-type motif 14 || Hs.526432 || AA463972 || || 256281 || 119512	1.97586	0
NUP43 || Nucleoporin 43kDa || Hs.510375 || AA621725 || || 348995 || 113551	1.50052	0.94976
NUP98 || Nucleoporin 98kDa || Hs.524750 || AA491315 || || 4928 || 308867	1.33549	1.68793
NUPL2 || Nucleoporin like 2 || Hs.408241 || AA467835 || || 11097 || 107525	2.15871	0.131852
NXF2 || Nuclear RNA export factor 2 || Hs.530358 || AI049827 || || 56001 || 111750	1.33337	0.803811
OACT2 || O-acyltransferase (membrane bound) domain containing 2 || Hs.467634 || W94209 || || 129642 || 108331	1.45791	1.47707
OAS2 || **2'-5'-oligoadenylate synthetase 2, 69/71kDa || Hs.414332 || AA481164 || || 4939 || 220672	1.31312	0.94976
OAZ3 || Ornithine decarboxylase antizyme 3 || Hs.407882 || AI040319 || || 51686 || 316945	1.40389	0.94976
OBFC1 || Oligonucleotide/oligosaccharide-binding fold containing 1 || Hs.134491 || AI269923 || || 79991 || 318981	1.53545	0.793728
OPA1 || Optic atrophy 1 (autosomal dominant) || Hs.478708 || H63676 || || 4976 || 106239	1.58932	0.244054
OSBPL3 || Oxysterol binding protein-like 3 || Hs.520259 || H10059 || || 26031 || 106829	1.40968	1.16101
OSBPL6 || Oxysterol binding protein-like 6 || Hs.318775 || AI094626 || || 114880 || 311581	1.48428	1.16101
OSBPL8 || Oxysterol binding protein-like 8 || Hs.430849 || AA126551 || || 114882 || 112637	1.51364	0.364305
OSTalpha || Organic solute transporter alpha || Hs.155932 || AI240281 || || 200931 || 316969	1.64759	0.425188
OTC || Ornithine carbamoyltransferase || Hs.117050 || AA677326 || || 5009 || 221480	1.37536	0.803811
P2RY1 || Purinergic receptor P2Y, G-protein coupled, 1 || Hs.2411 || AI820551 || || 5028 || 106592	2.46053	0
P2RY14 || Purinergic receptor P2Y, G-protein coupled, 14 || Hs.2465 || AA026830 || || 9934 || 117586	1.42626	0.425188
PACSIN2 || Protein kinase C and casein kinase substrate in neurons 2 || Hs.162877 || T97930 || || 11252 || 118862	1.29618	1.62173
PADI2 || Peptidyl arginine deiminase, type II || Hs.33455 || AI688230 || || 11240 || 319785	1.68579	0
PAI-RBP1 || PAI-1 mRNA-binding protein || Hs.530412 || AA456286 || || 26135 || 108350	1.34266	1.87613
PAK3 || P21 (CDKN1A)-activated kinase 3 || Hs.390616 || AI090533 || || 5063 || 319971	1.57435	0.247501
PALM2-AKAP2 || PALM2-AKAP2 protein || Hs.259461 || AA594010 || || 445815 || 99656	1.35429	1.07143
PALM2-AKAP2 || PALM2-AKAP2 protein || Hs.259461 || AA682795 || || 445815 || 226510	1.63584	0.185724
PANK3 || Pantothenate kinase 3 || Hs.388400 || AI002941 || || 79646 || 317844	1.36413	0.704799
PAPPA || Pregnancy-associated plasma protein A, pappalysin 1 || Hs.494928 || R10973 || || 5069 || 108794	1.42219	1.07143
PAPPA || Pregnancy-associated plasma protein A, pappalysin 1 || Hs.494928 || R26106 || || 5069 || 118040	1.52761	0.244054
PAPPA || Pregnancy-associated plasma protein A, pappalysin 1 || Hs.494928 || R96235 || || 5069 || 109958	1.53519	1.68793
PAQR3 || Progestin and adipoQ receptor family member III || Hs.368305 || AA594588 || || 152559 || 106881	1.45072	0.793728
PAQR9 || Progestin and adipoQ receptor family member IX || Hs.408385 || AA629559 || || 344838 || 226899	1.42178	1.62173
PARD3 || Par-3 partitioning defective 3 homolog (C. elegans) || Hs.131489 || AA436455 || || 56288 || 112357	1.51947	0.542583
PART1 || Prostate androgen-regulated transcript 1 || Hs.412792 || AI311391 || || 25859 || 313144	1.48616	1.47707
PARVG || Parvin, gamma || Hs.546422 || AA488785 || || 64098 || 310712	1.65507	0.185724
PASK || PAS domain containing serine/threonine kinase || Hs.397891 || AI242902 || || 23178 || 317085	1.54941	0.326679
PAX2 || Paired box gene 2 || Hs.155644 || AI300766 || || 5076 || 312491	1.36356	1.32401
PAX5 || Paired box gene 5 (B-cell lineage specific activator) || Hs.126365 || AI762480 || || 5079 || 330358	1.56804	0.326679
PB1 || Polybromo 1 || Hs.189920 || AA001227 || || 55193 || 114749	1.28247	1.87613
PC4 || Activated RNA polymerase II transcription cofactor 4 || Hs.229641 || N50375 || Unknown UG Hs.84521 ESTs || 10923 || 110254	1.46187	1.07143
PCAF || P300/CBP-associated factor || Hs.533055 || AI337108 || || 8850 || 310441	1.41321	1.16101
PCBP2 || Poly(rC) binding protein 2 || Hs.546271 || H90894 || || 5094 || 107515	1.62098	0.364305
PCDH9 || Protocadherin 9 || Hs.407643 || N63057 || || 5101 || 113805	1.55228	0.185724
PDCD2 || Programmed cell death 2 || Hs.367900 || AA521466 || || 5134 || 120181	1.35523	1.47707
PDCD5 || Programmed cell death 5 || Hs.443831 || AA416757 || || 9141 || 308622	1.33467	1.68793
PDE4DIP || Phosphodiesterase 4D interacting protein (myomegalin) || Hs.487925 || AA608532 || || 9659 || 107140	1.3352	1.62173
PDE7A || Phosphodiesterase 7A || Hs.527119 || AA954842 || || 5150 || 309271	1.3616	1.32401
PDK3 || Pyruvate dehydrogenase kinase, isoenzyme 3 || Hs.444422 || N63567 || || 5165 || 107464	2.06615	0
PDLIM7 || PDZ and LIM domain 7 (enigma) || Hs.533040 || AA125911 || || 9260 || 106499	1.83699	0
PDZRN3 || PDZ domain containing RING finger 3 || Hs.434900 || AA931416 || || 23024 || 106779	1.42708	0.793728
PENK || Proenkephalin || Hs.339831 || AI363200 || || 5179 || 307795	1.81272	0.803811
PERQ1 || PERQ amino acid rich, with GYF domain 1 || Hs.414396 || N93582 || || 64599 || 107512	2.13038	0.131852
PEX26 || Peroxisome biogenesis factor 26 || Hs.517400 || AA969448 || || 55670 || 109757	1.54161	0.803811
PEX5 || Peroxisomal biogenesis factor 5 || Hs.479944 || AI269119 || || 5830 || 308468	1.36799	0.704799
PFAAP5 || Phosphonoformate immuno-associated protein 5 || Hs.507680 || AA699390 || || 10443 || 119024	1.43541	1.87613
PFAAP5 || Phosphonoformate immuno-associated protein 5 || Hs.507680 || AI000261 || || 10443 || 307039	1.68537	0
PFDN4 || Prefoldin 4 || Hs.91161 || AA250726 || || 5203 || 102434	1.71982	0.326679
PFN1 || Profilin 1 || Hs.494691 || AA443915 || || 5216 || 119685	1.41364	0.704799
PFTK1 || PFTAIRE protein kinase 1 || Hs.430742 || AA653445 || || 5218 || 108324	2.79615	0
PGBD3 || Excision repair cross-complementing rodent repair deficiency, complementation group 6 || Hs.133444 || AA907277 || || 267004 || 104495	1.97686	0
PGC || Progastricsin (pepsinogen C) || Hs.1867 || AI674972 || || 5225 || 319152	2.01079	0
PGCP || Plasma glutamate carboxypeptidase || Hs.156178 || AI187280 || || 10404 || 313783	1.53151	0.185724
PGPEP1 || Pyroglutamyl-peptidase I || Hs.131776 || AA669057 || || 54858 || 221014	1.56428	0.185724
PHACTR4 || Phosphatase and actin regulator 4 || Hs.225641 || AA416547 || || 65979 || 107709	1.30585	1.68793
PHF12 || PHD finger protein 12 || Hs.444173 || AI092429 || || 57649 || 314194	2.30558	0
PHYHIPL || Family with sequence similarity 13, member C1 || Hs.499704 || AA634475 || || 84457 || 220115	1.56282	0.247501
PIGF || Phosphatidylinositol glycan, class F || Hs.468415 || AI300517 || || 5281 || 316599	1.37929	0.803811
PIK3CD || Phosphoinositide-3-kinase, catalytic, delta polypeptide || Hs.518451 || AA281652 || || 5293 || 114116	1.71235	0.131852
PITPNA || Phosphatidylinositol transfer protein, alpha || Hs.429819 || AA293072 || || 5306 || 107618	1.82121	0
PKHD1 || Polycystic kidney and hepatic disease 1 (autosomal recessive) || Hs.446118 || AI203243 || || 5314 || 319127	1.53213	1.16101
PKNOX1 || PBX/knotted 1 homeobox 1 || Hs.431043 || AI350546 || || 5316 || 308658	1.45937	0.803811
PLA2R1 || **Phospholipase A2 receptor 1, 180kDa || Hs.410477 || W44656 || || 22925 || 104852	1.36923	1.32401
PLAA || Phospholipase A2-activating protein || Hs.27182 || AI675369 || || 9373 || 313541	1.33341	1.47707
PLCB1 || Phospholipase C, beta 1 (phosphoinositide-specific) || Hs.310537 || AA159899 || || 23236 || 100597	1.73321	0.0990004
PLCB1 || Phospholipase C, beta 1 (phosphoinositide-specific) || Hs.310537 || AA398439 || || 23236 || 114399	1.31742	2.01742
PLEC1 || Plectin 1, intermediate filament binding protein 500kDa || Hs.434248 || AA629644 || || 5339 || 106597	1.65867	0
PLEKHH2 || Pleckstrin homology domain containing, family H (with MyTH4 domain) member 2 || Hs.164162 || AI288531 || || 130271 || 316665	1.33686	1.87613
PLS3 || Plastin 3 (T isoform) || Hs.496622 || AA505317 || || 5358 || 98864	1.83901	0.803811
PLXDC1 || Plexin domain containing 1 || Hs.125036 || AA678084 || || 57125 || 224573	1.65984	0.131852
[truncated: 446 more rows]
